# Supplementary material for: A non-metal catalysed oxidation of primary azides to nitriles at ambient temperature
Source: Royal Society of Chemistry journal article supplement (doi:10.1039/c2ob06949k), 2012-01-01

## Electronic Supplementary Information

### A Non-metal Catalysed Oxidation of Primary Azides to Nitriles at Ambient Temperature

Manjunath Lamani, Pradeep Devadig and Kandikere Ramaiah Prabhu<sup>\*a</sup>

|   |                                                                                        |        |
|---|----------------------------------------------------------------------------------------|--------|
| 1 | Scheme for the Synthesis of 2-((6-Azidomethyl)oxy-5-(azidomethyl)-1,3-dimethoxybenzene | ESI-2  |
| 2 | <sup>1</sup> H and <sup>13</sup> C Spectra of azides                                   | ESI-5  |
| 3 | <sup>1</sup> H and <sup>13</sup> C Spectra of Nitrile                                  | ESI-41 |

## 2-(((6-Azidomethyl)oxy)-5-(azidomethyl)-1,3-dimethoxybenzene(1o):

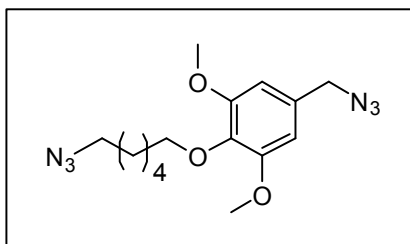

*The above mentioned compound (1o) is synthesized through following scheme*

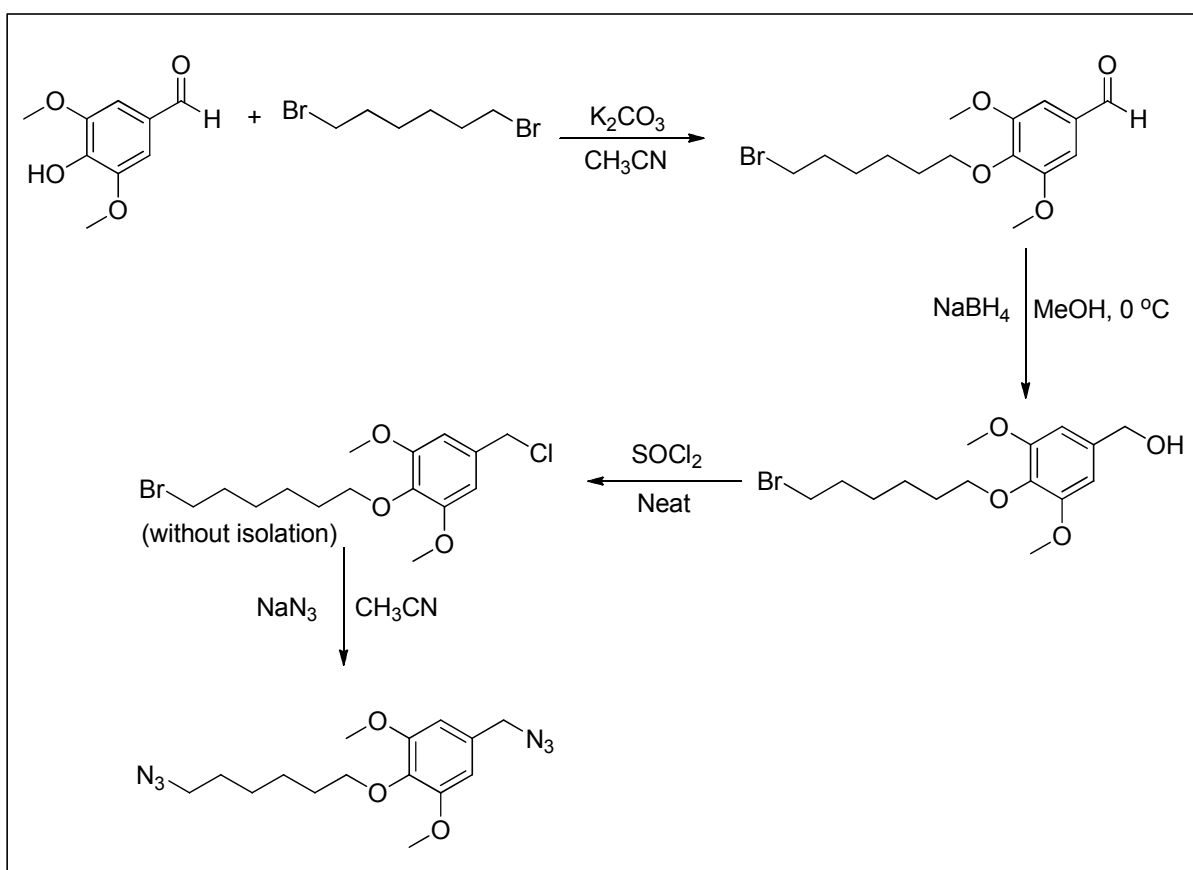

### 4-((6-bromohexyl)oxy)-3,5-dimethoxybenzaldehyde

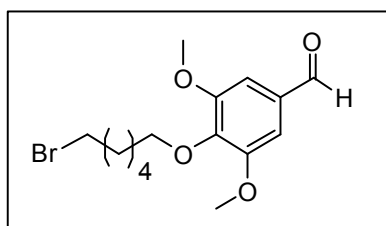

Colorless liquid; Yield - 70%;  $R_f$  (25% EtOAc/Hexane) 0.7; Prepared as shown in general scheme 1.  $^1\text{H NMR}$  (400 MHz,  $\text{CDCl}_3$ ):  $\delta$  9.87 (s, 1H), 7.13 (s, 2H), 4.08 (t,  $J = 6.56$  Hz, 2H), 3.92 (s, 6H), 3.42 (t,  $J = 6.76$  Hz, 2H), 1.92 – 1.86 (m, 2H), 1.81 – 1.74 (m, 2H), 1.53 – 1.50 (m, 4H);  $^{13}\text{C NMR}$  (100 MHz,  $\text{CDCl}_3$ ):  $\delta$  191.0, 153.8, 142.9, 131.6, 106.7, 73.3, 56.2, 33.8, 32.7, 29.8, 27.8, 25.0; **HRESI-MS** ( $m/z$ ): Calculated for  $\text{C}_{15}\text{H}_{21}\text{BrO}_4$  ( $M + \text{Na}$ ): 367.0521, found ( $M + \text{Na}$ ): 367.0520.

### 4-((6-bromohexyl)oxy)-3,5-dimethoxyphenyl)methanol

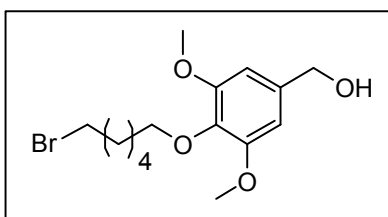

Colorless liquid; Yield - 90%;  $R_f$  (25% EtOAc/Hexane) 0.2; Prepared as shown in general scheme 1.  $^1\text{H NMR}$  (400 MHz,  $\text{CDCl}_3$ ):  $\delta$  6.58 (s, 2H), 4.61 (d,  $J = 5.76$  Hz, 2H), 3.94 (t,  $J = 6.64$  Hz, 2H), 3.83 (s, 6H), 3.42 (t,  $J = 6.80$  Hz, 2H), 2.02 – 1.99 (m, 1H), 1.90 – 1.88 (m, 2H), 1.76 – 1.73 (m, 2H), 1.50 – 1.49 (m, 4H);  $^{13}\text{C NMR}$  (100 MHz,  $\text{CDCl}_3$ ):  $\delta$  153.4, 136.4, 136.3, 103.8, 73.1, 65.4, 56.0, 33.9, 32.7, 29.8, 27.9, 25.0; **HRESI-MS** ( $m/z$ ): Calculated for  $\text{C}_{15}\text{H}_{23}\text{BrO}_4$  ( $M + \text{Na}$ ): 369.0677, found ( $M + \text{Na}$ ): 369.0677.

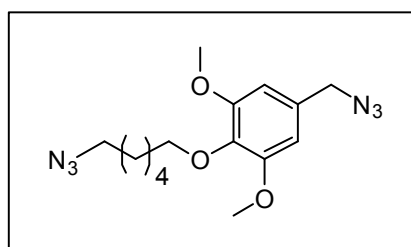

(10)

Colorless liquid; Yield - 75%;  $R_f$  (25% EtOAc/Hexane) 0.7; Prepared as shown in general scheme 1. **IR** (Neat,  $\text{cm}^{-1}$ ): 2097;  $^1\text{H NMR}$  (400 MHz,  $\text{CDCl}_3$ ):  $\delta$  6.52 (s, 2H), 4.28 (s, 2H), 3.96 (t,  $J = 6.6$  Hz, 2H), 3.85 (s, 6H), 3.28 (t,  $J = 6.92$  Hz, 2H), 1.79 – 1.72 (m, 2H), 1.65 – 1.60 (m, 2H), 1.53 – 1.43

(m, 4H);  $^{13}\text{C}$  NMR (100 MHz,  $\text{CDCl}_3$ ):  $\delta$  153.4, 137.1, 130.7, 105.2, 73.1, 56.1, 55.1, 51.4, 29.9, 28.8, 26.5, 25.4; **HRESI-MS** ( $m/z$ ): Calculated for  $\text{C}_{15}\text{H}_{22}\text{N}_6\text{O}_3$  (M + Na): 357.1651, found (M + Na): 357.1653.

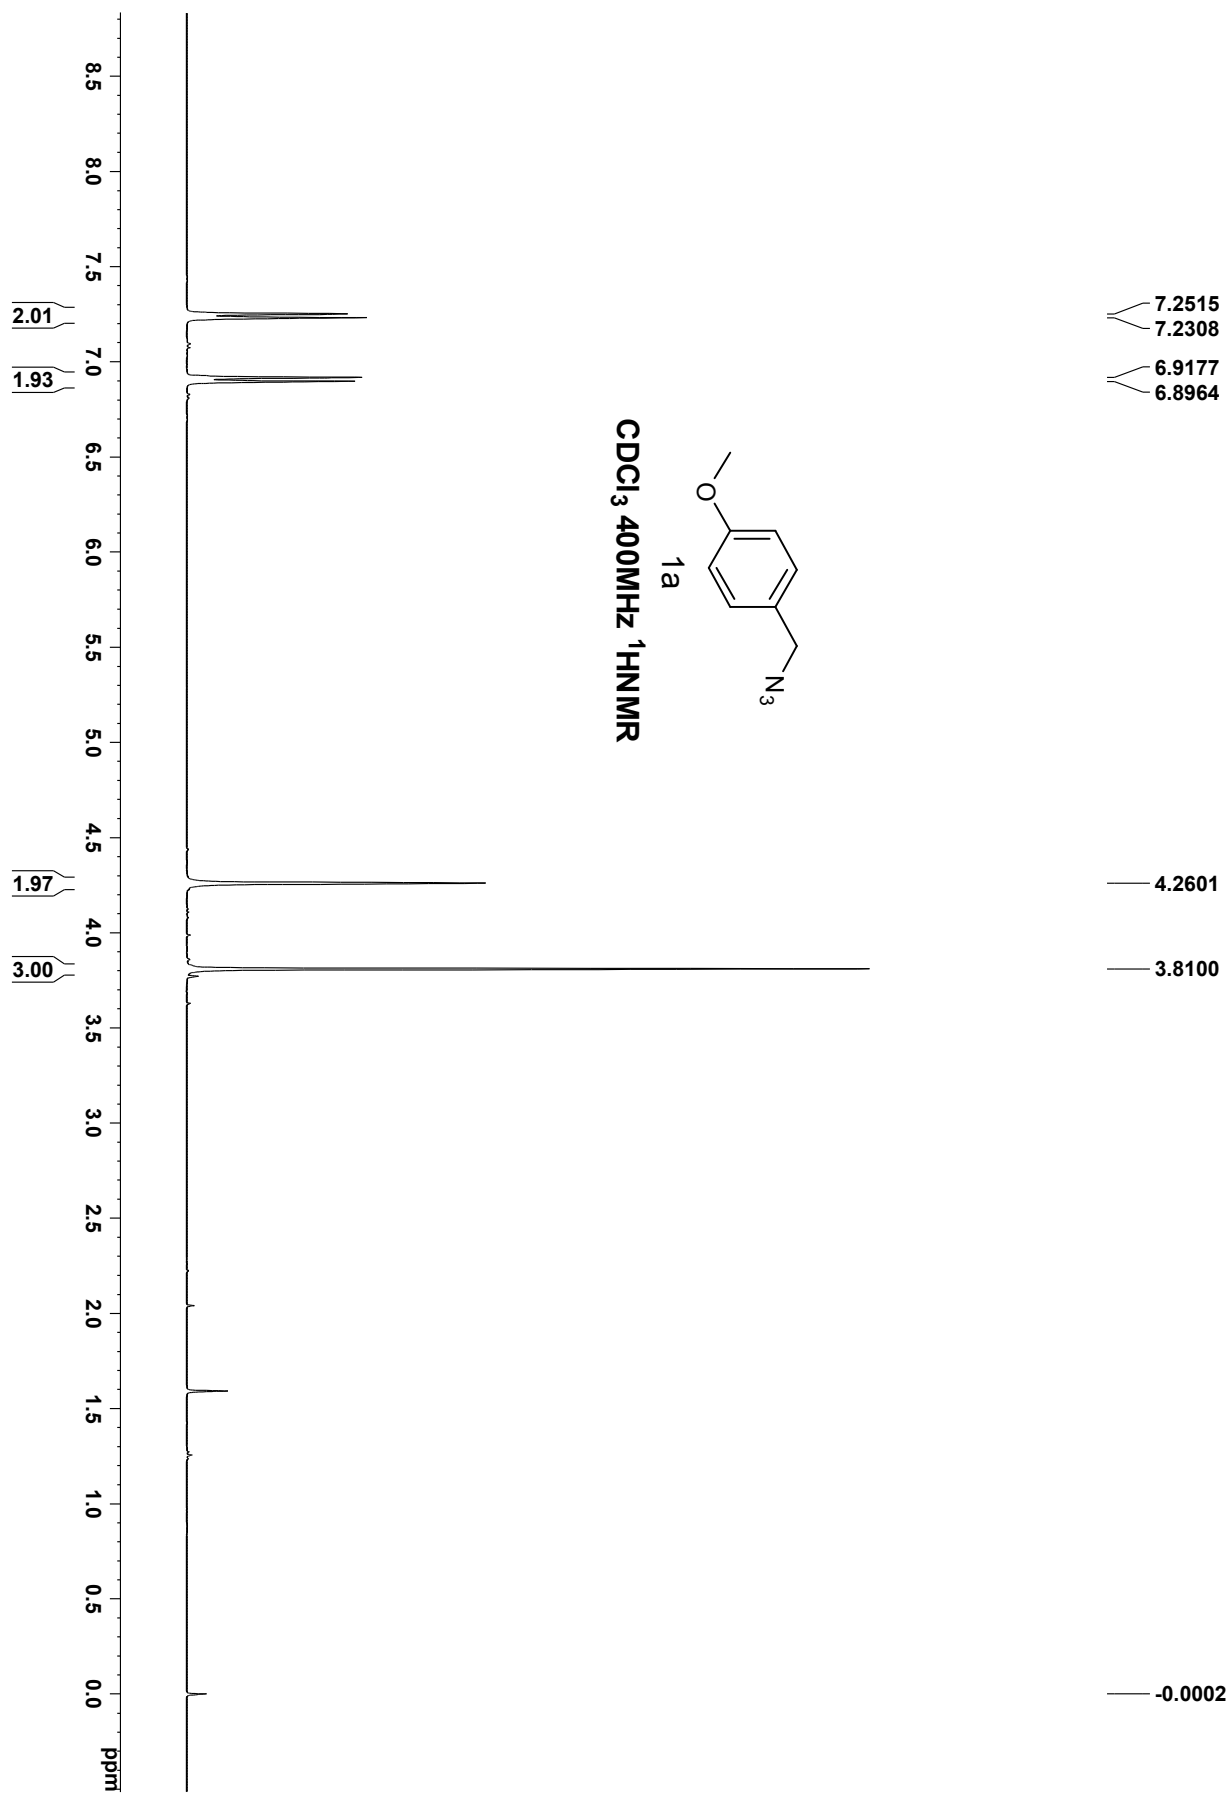

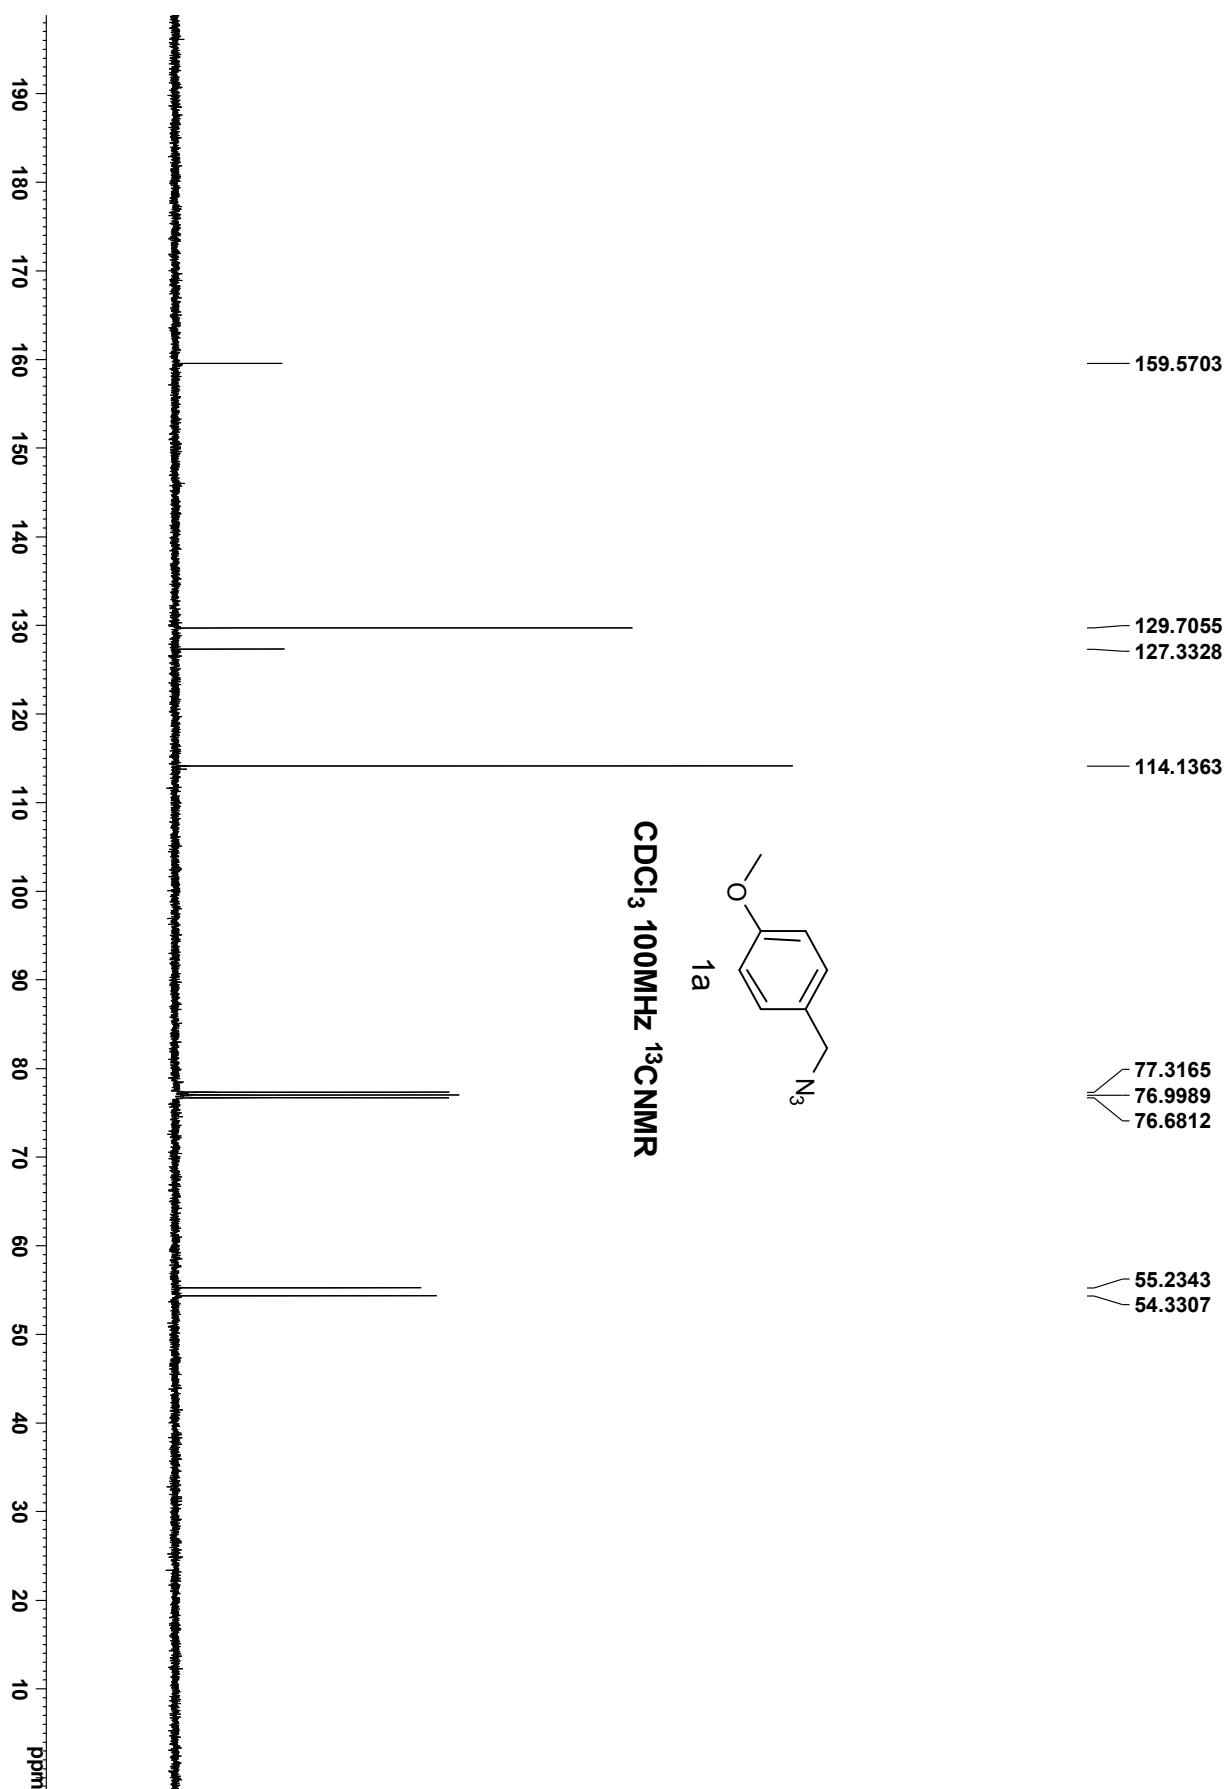

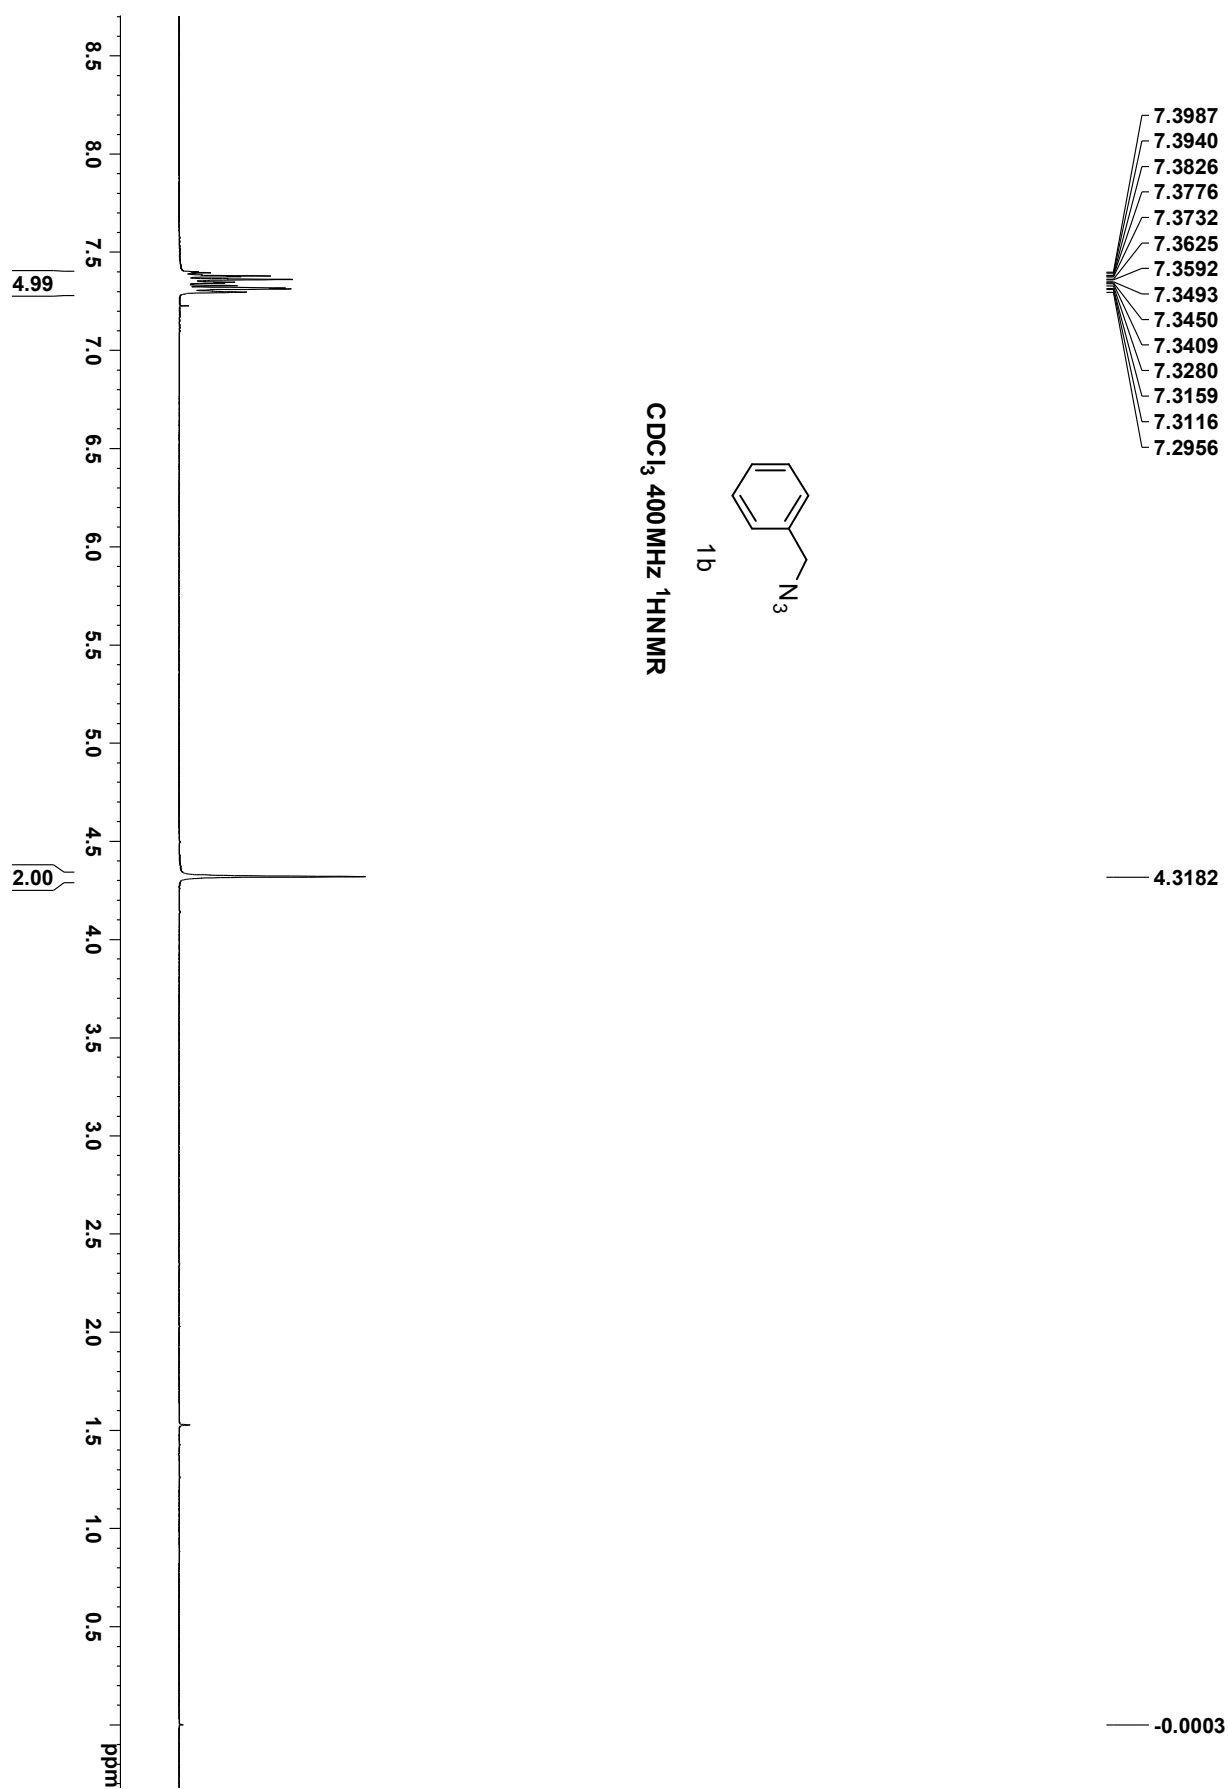

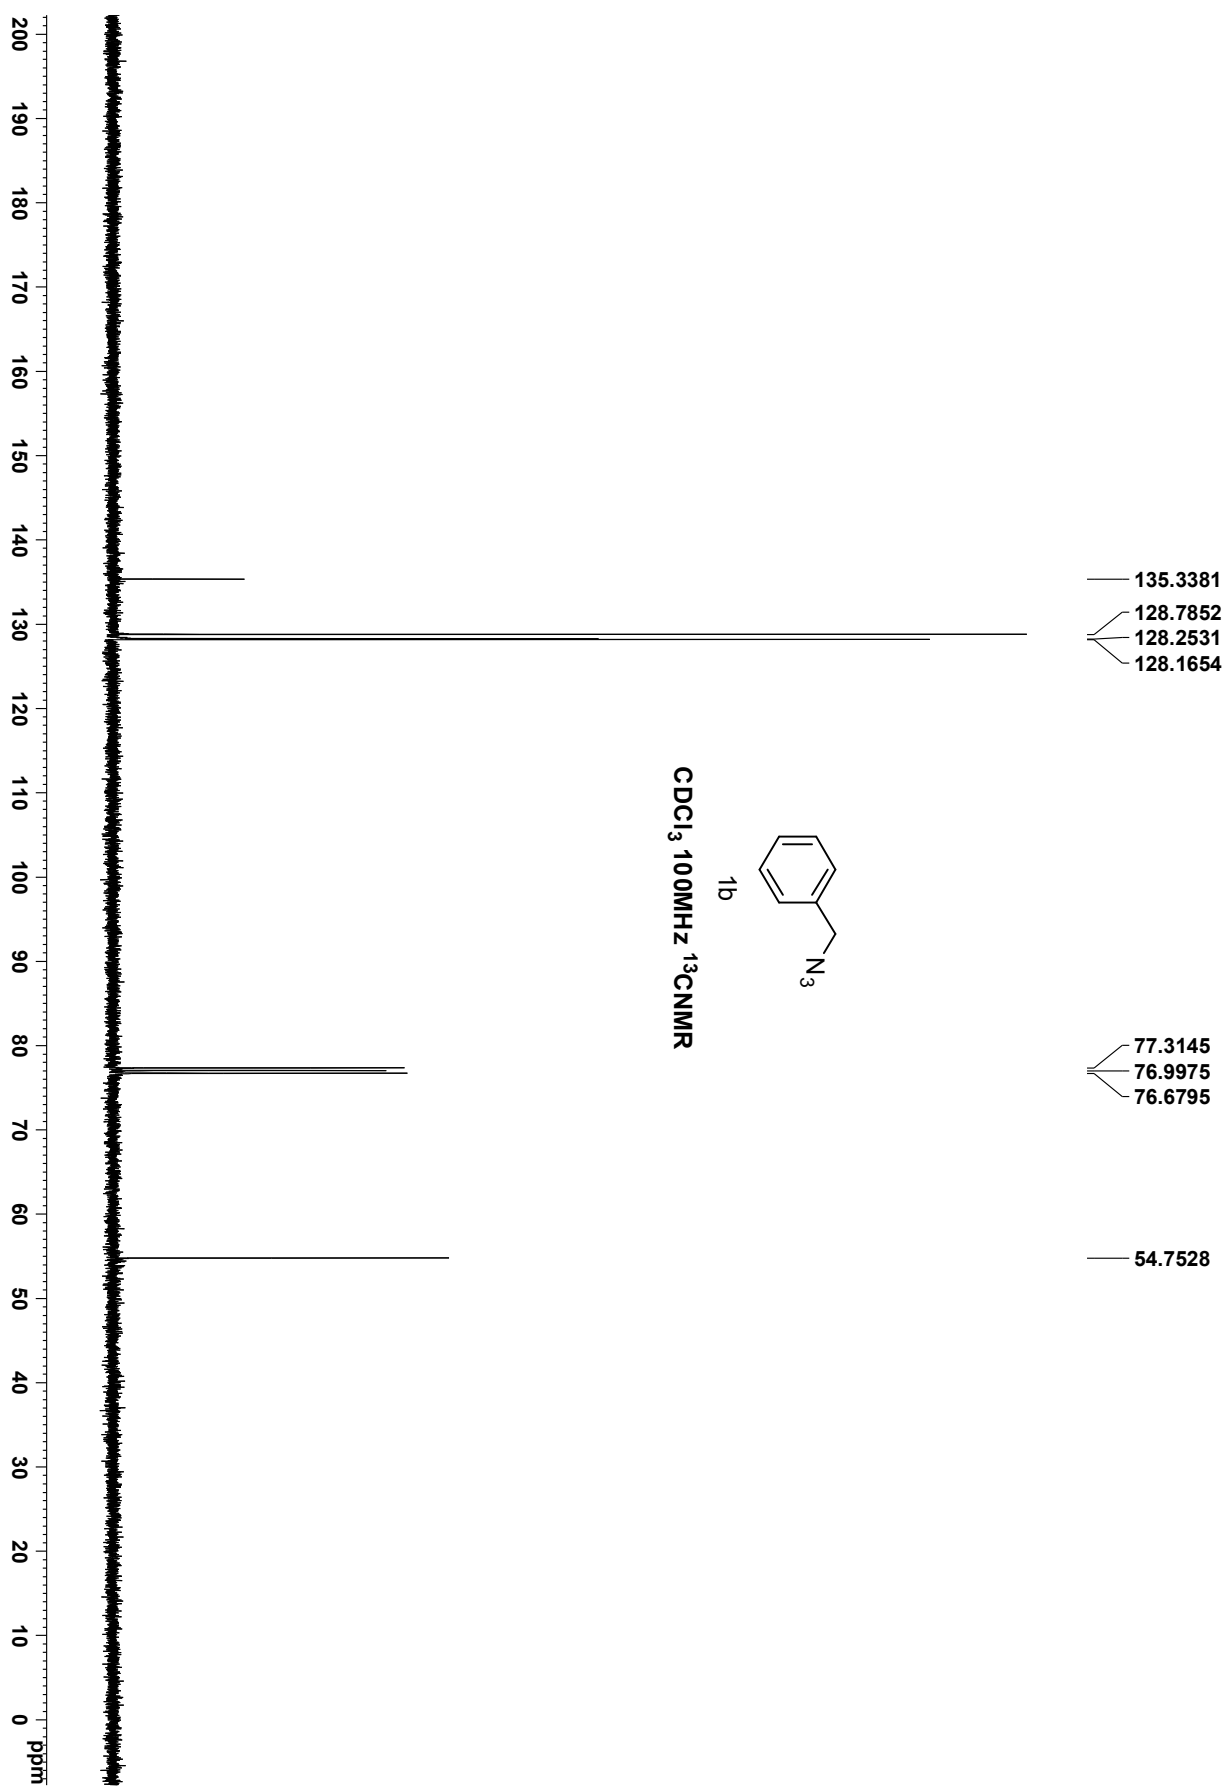



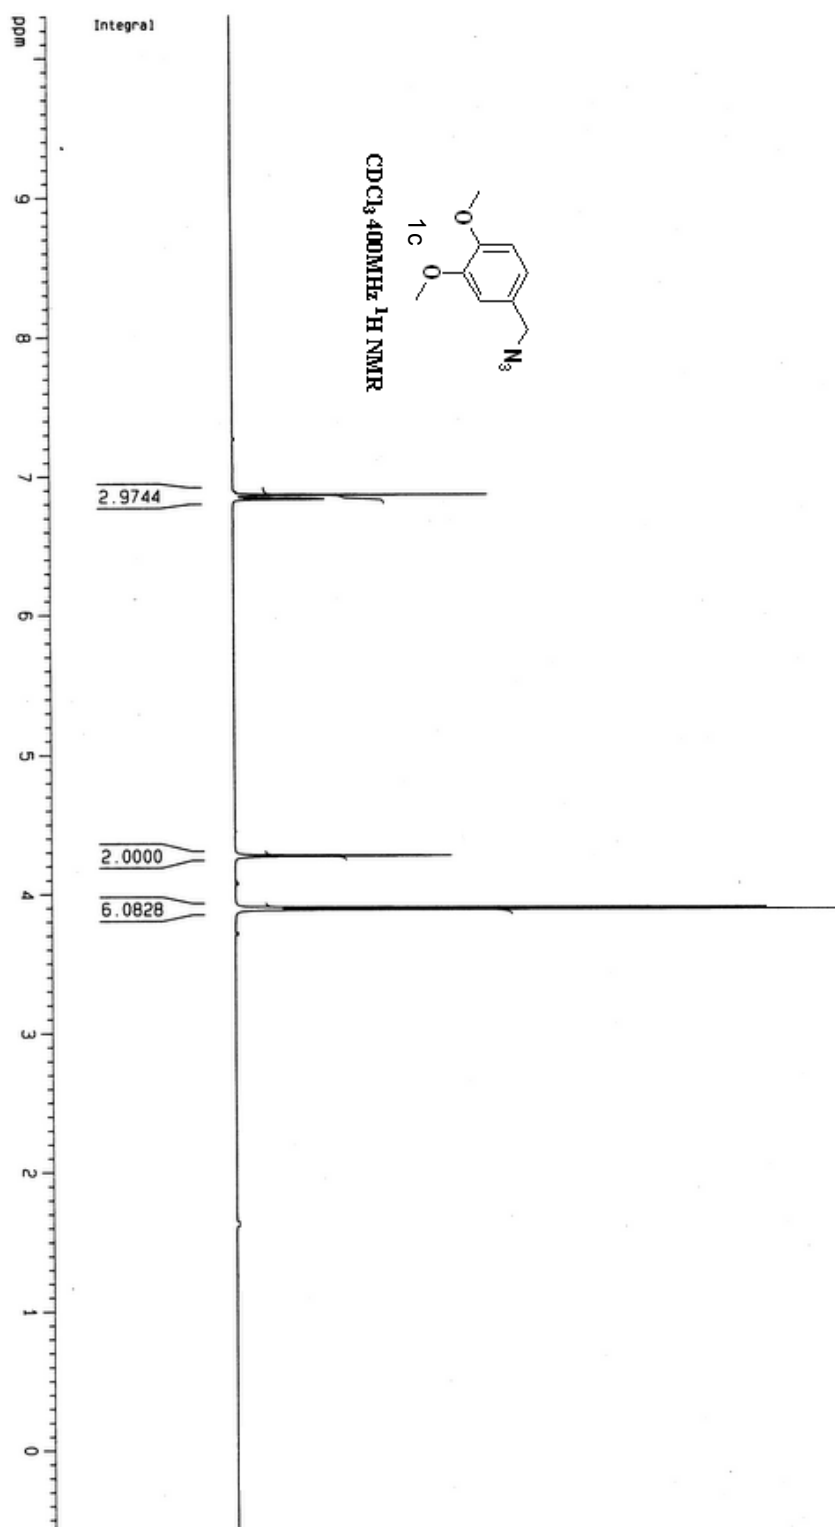

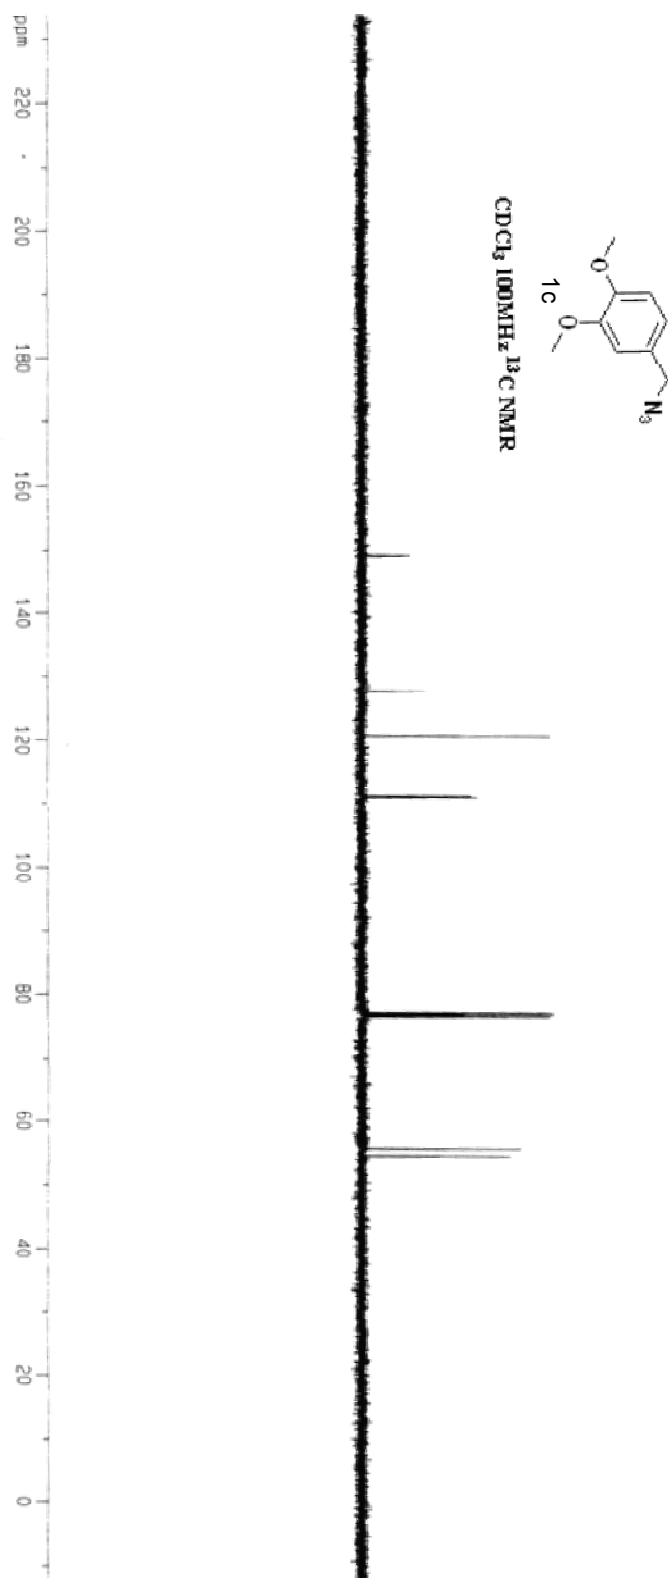

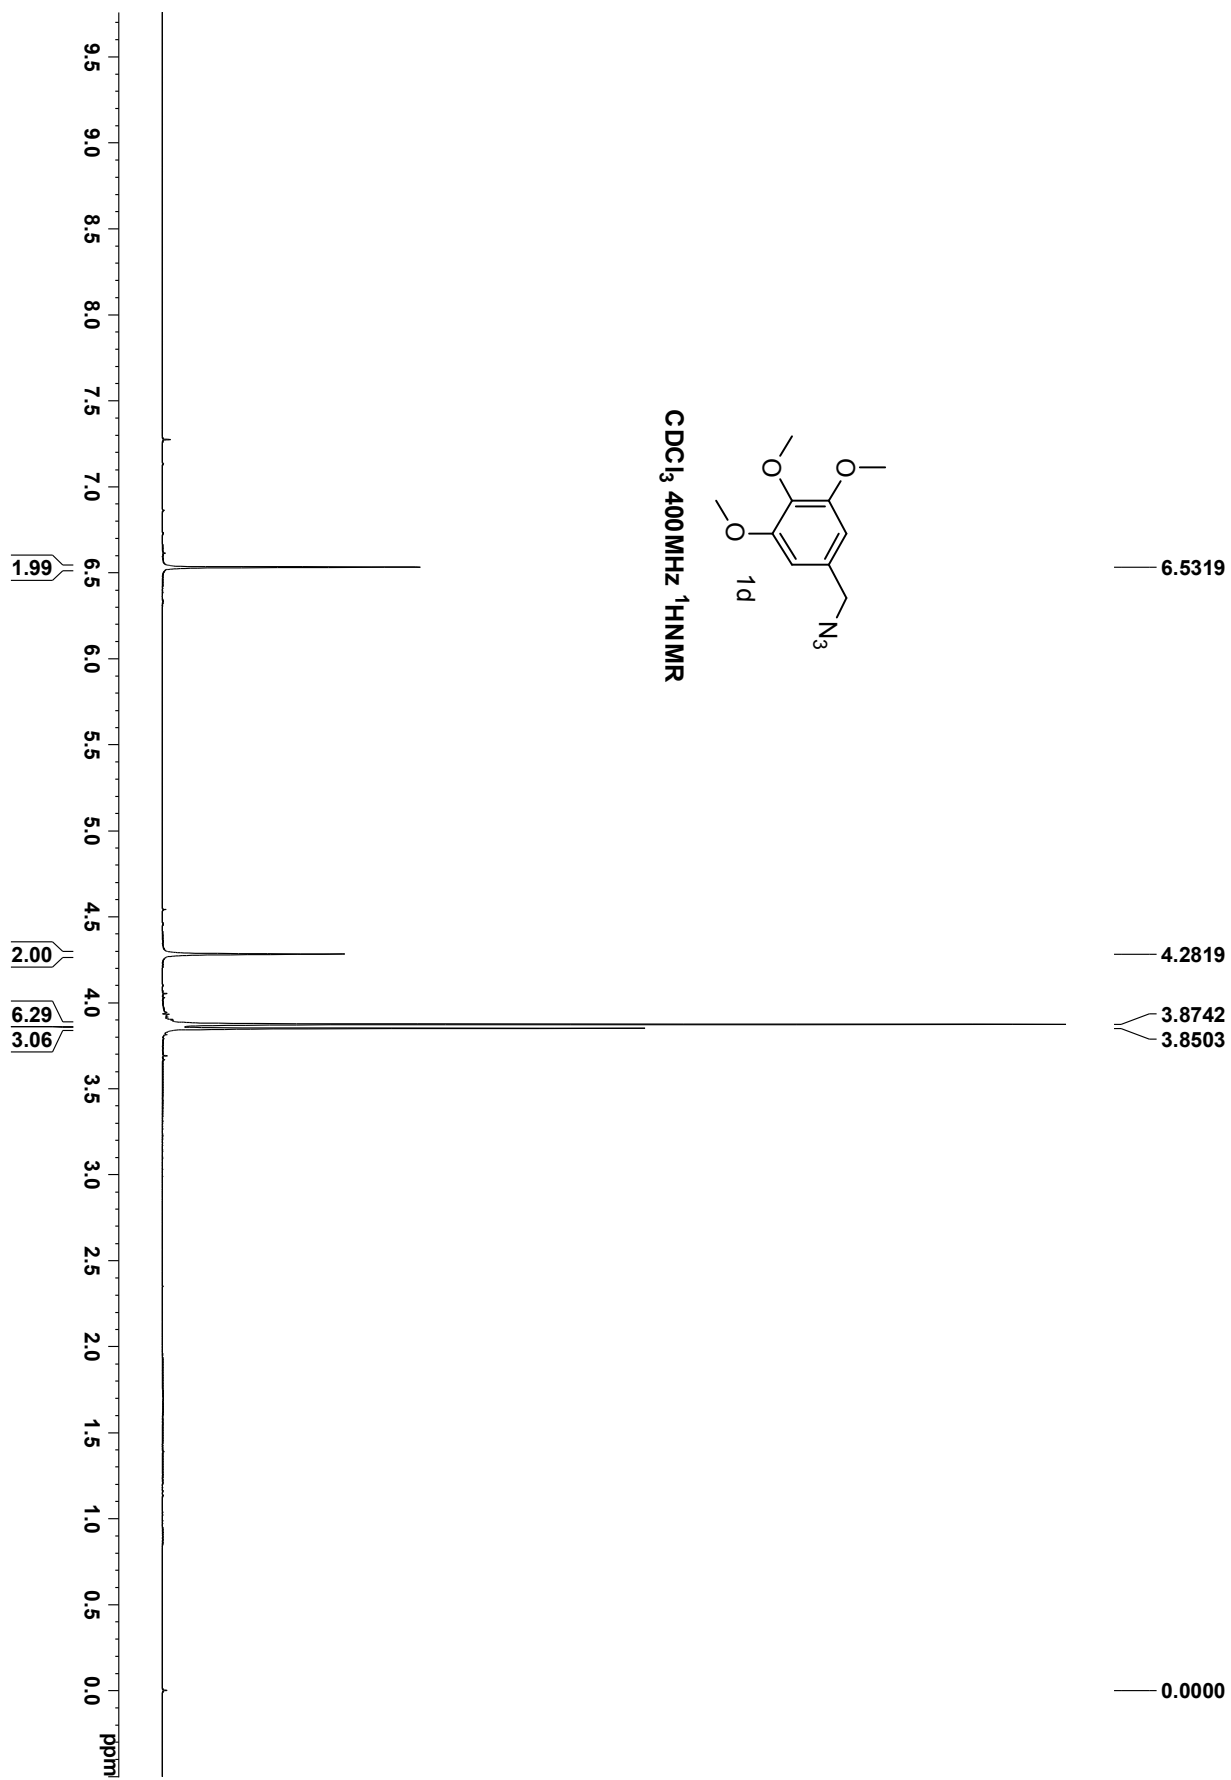

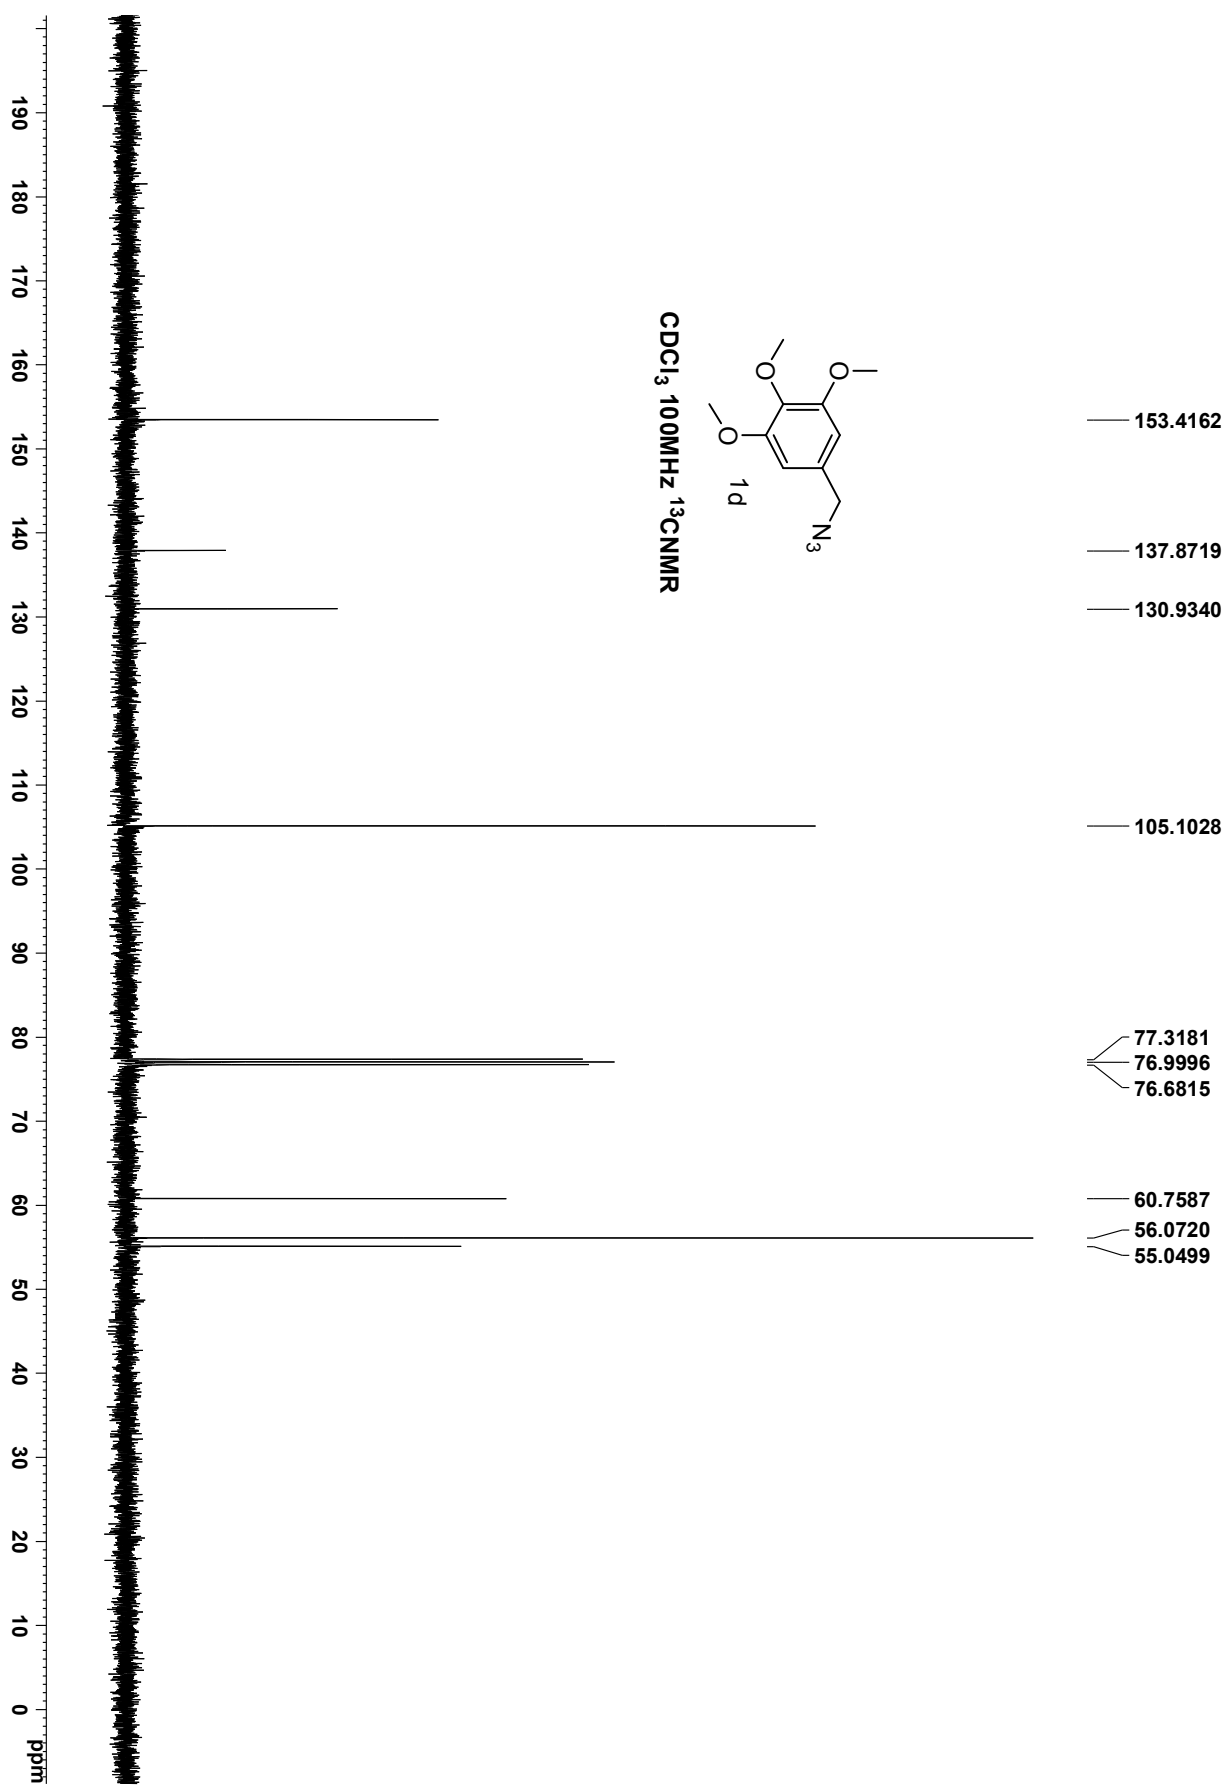

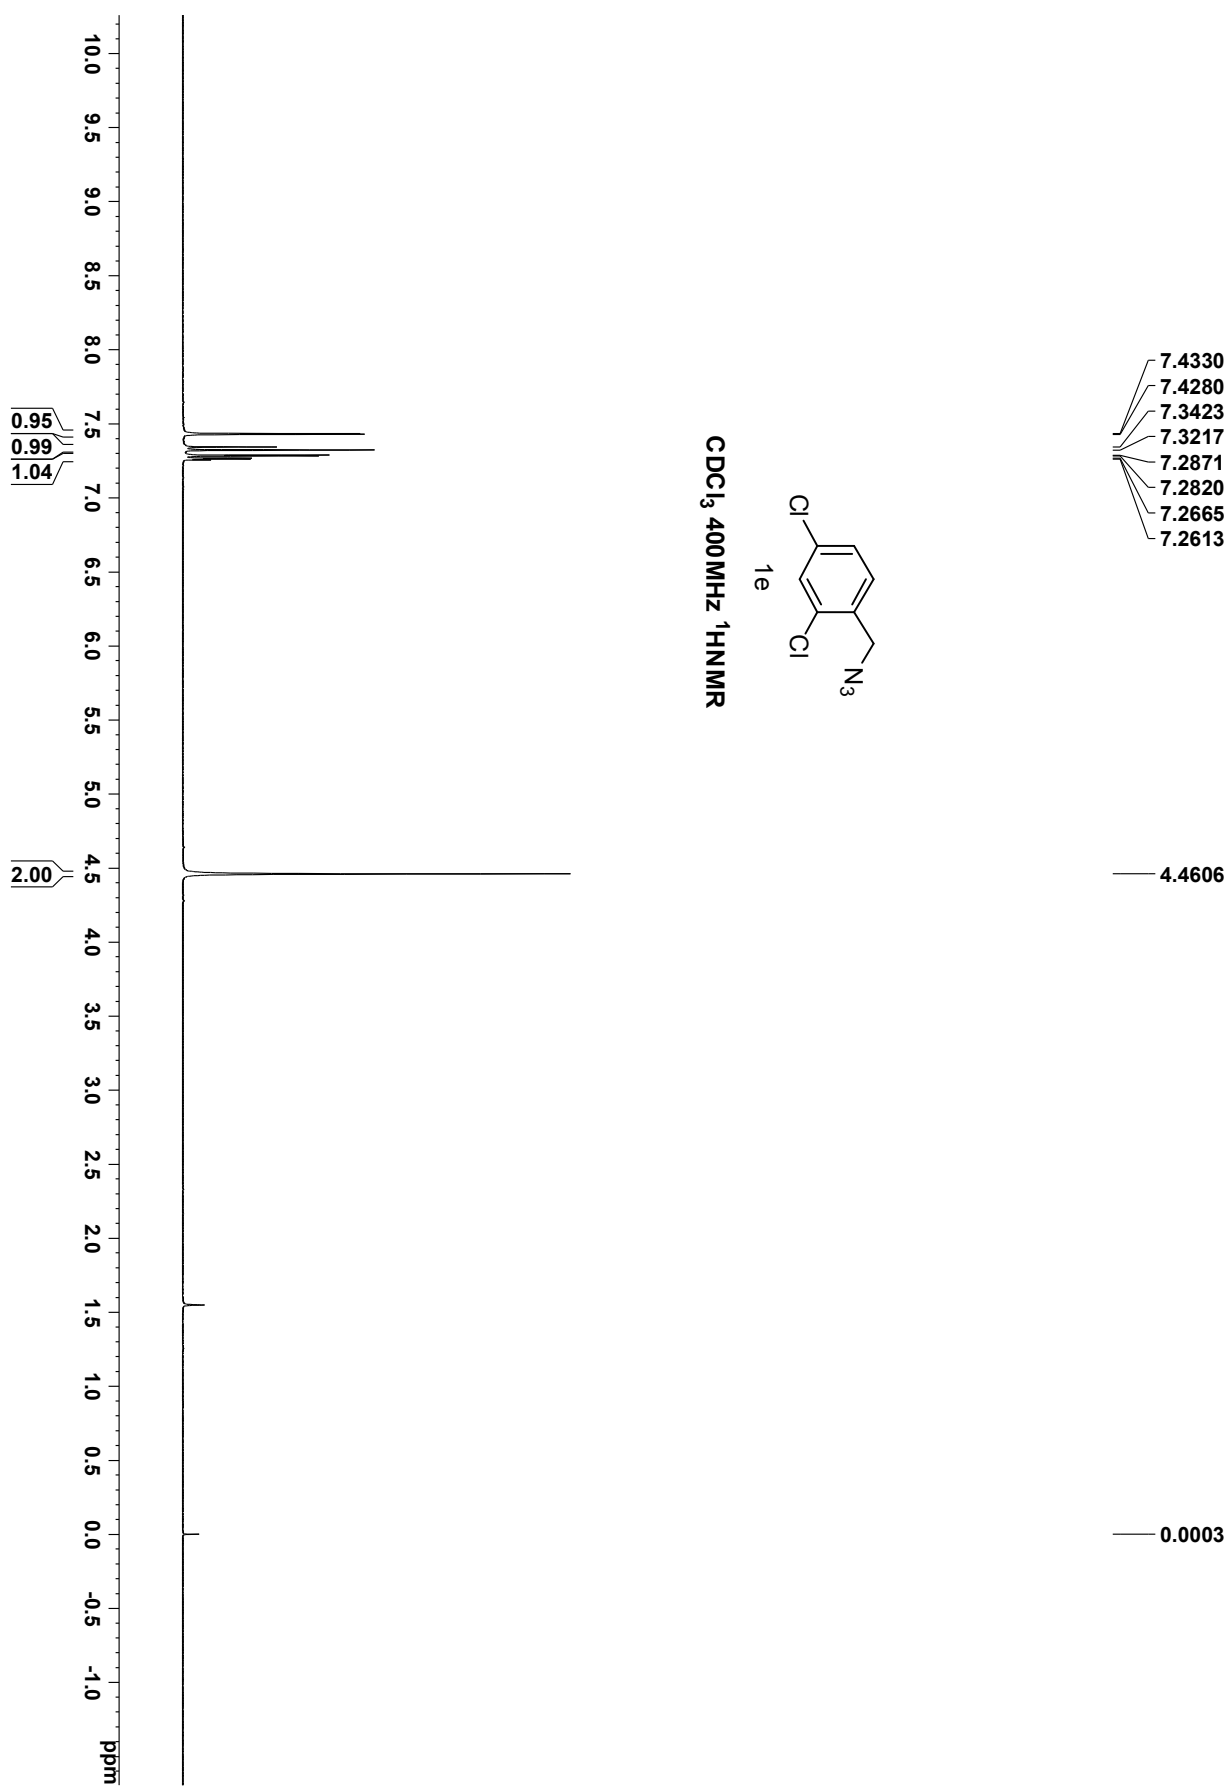

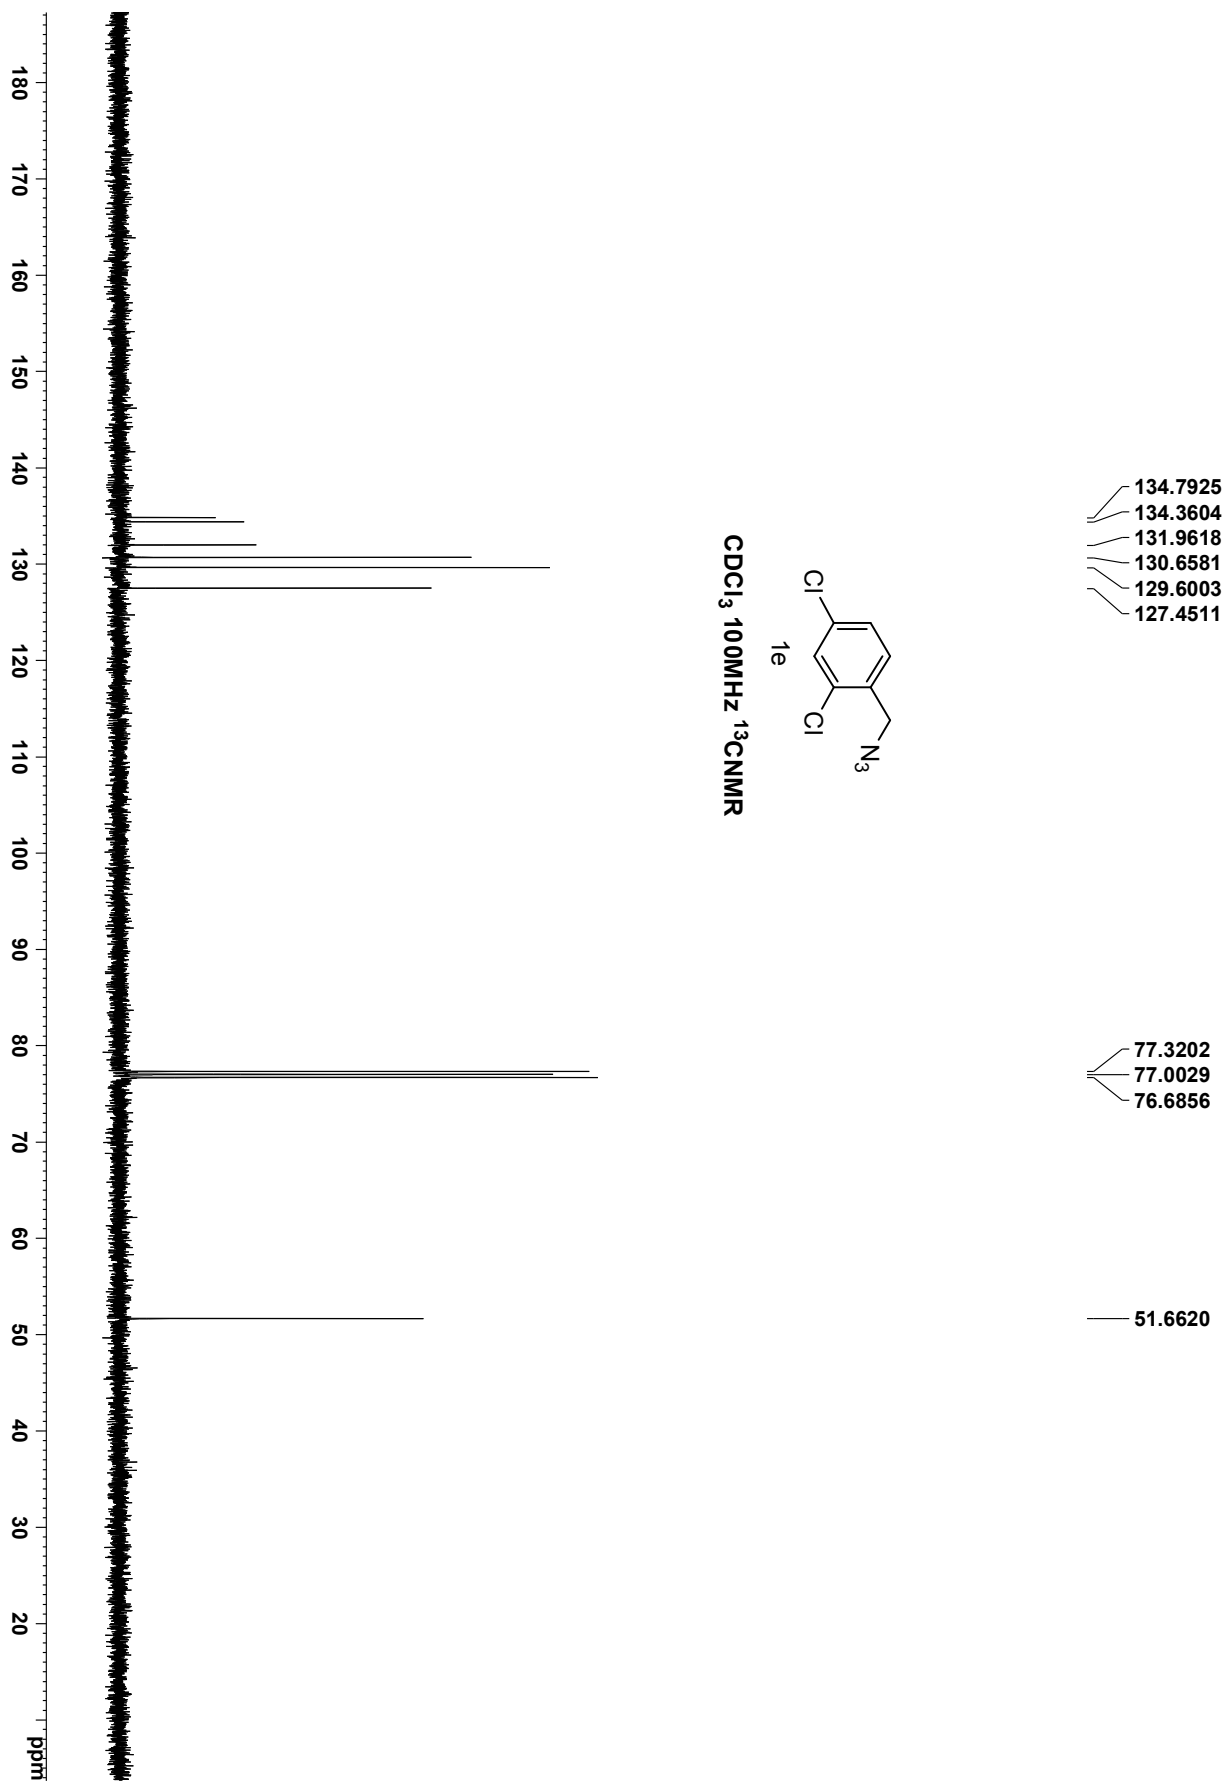

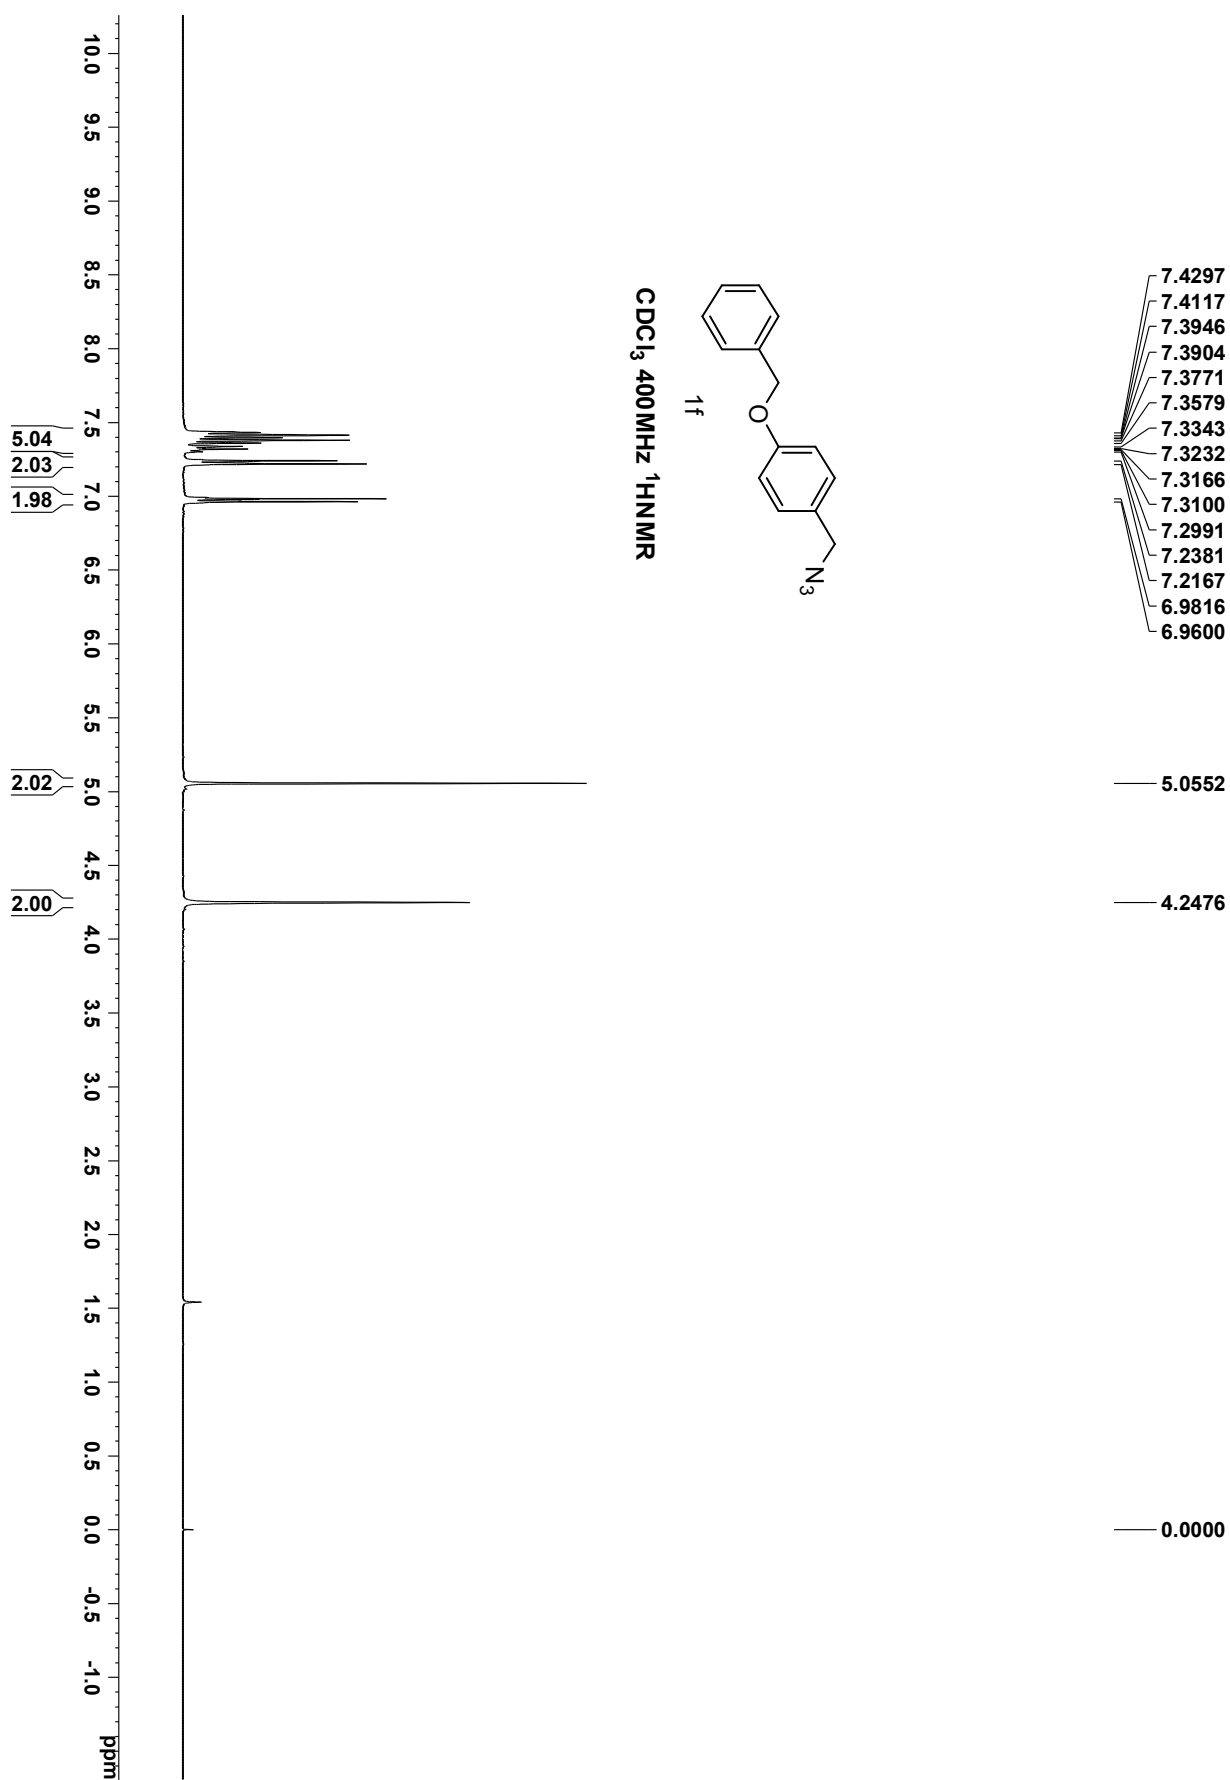

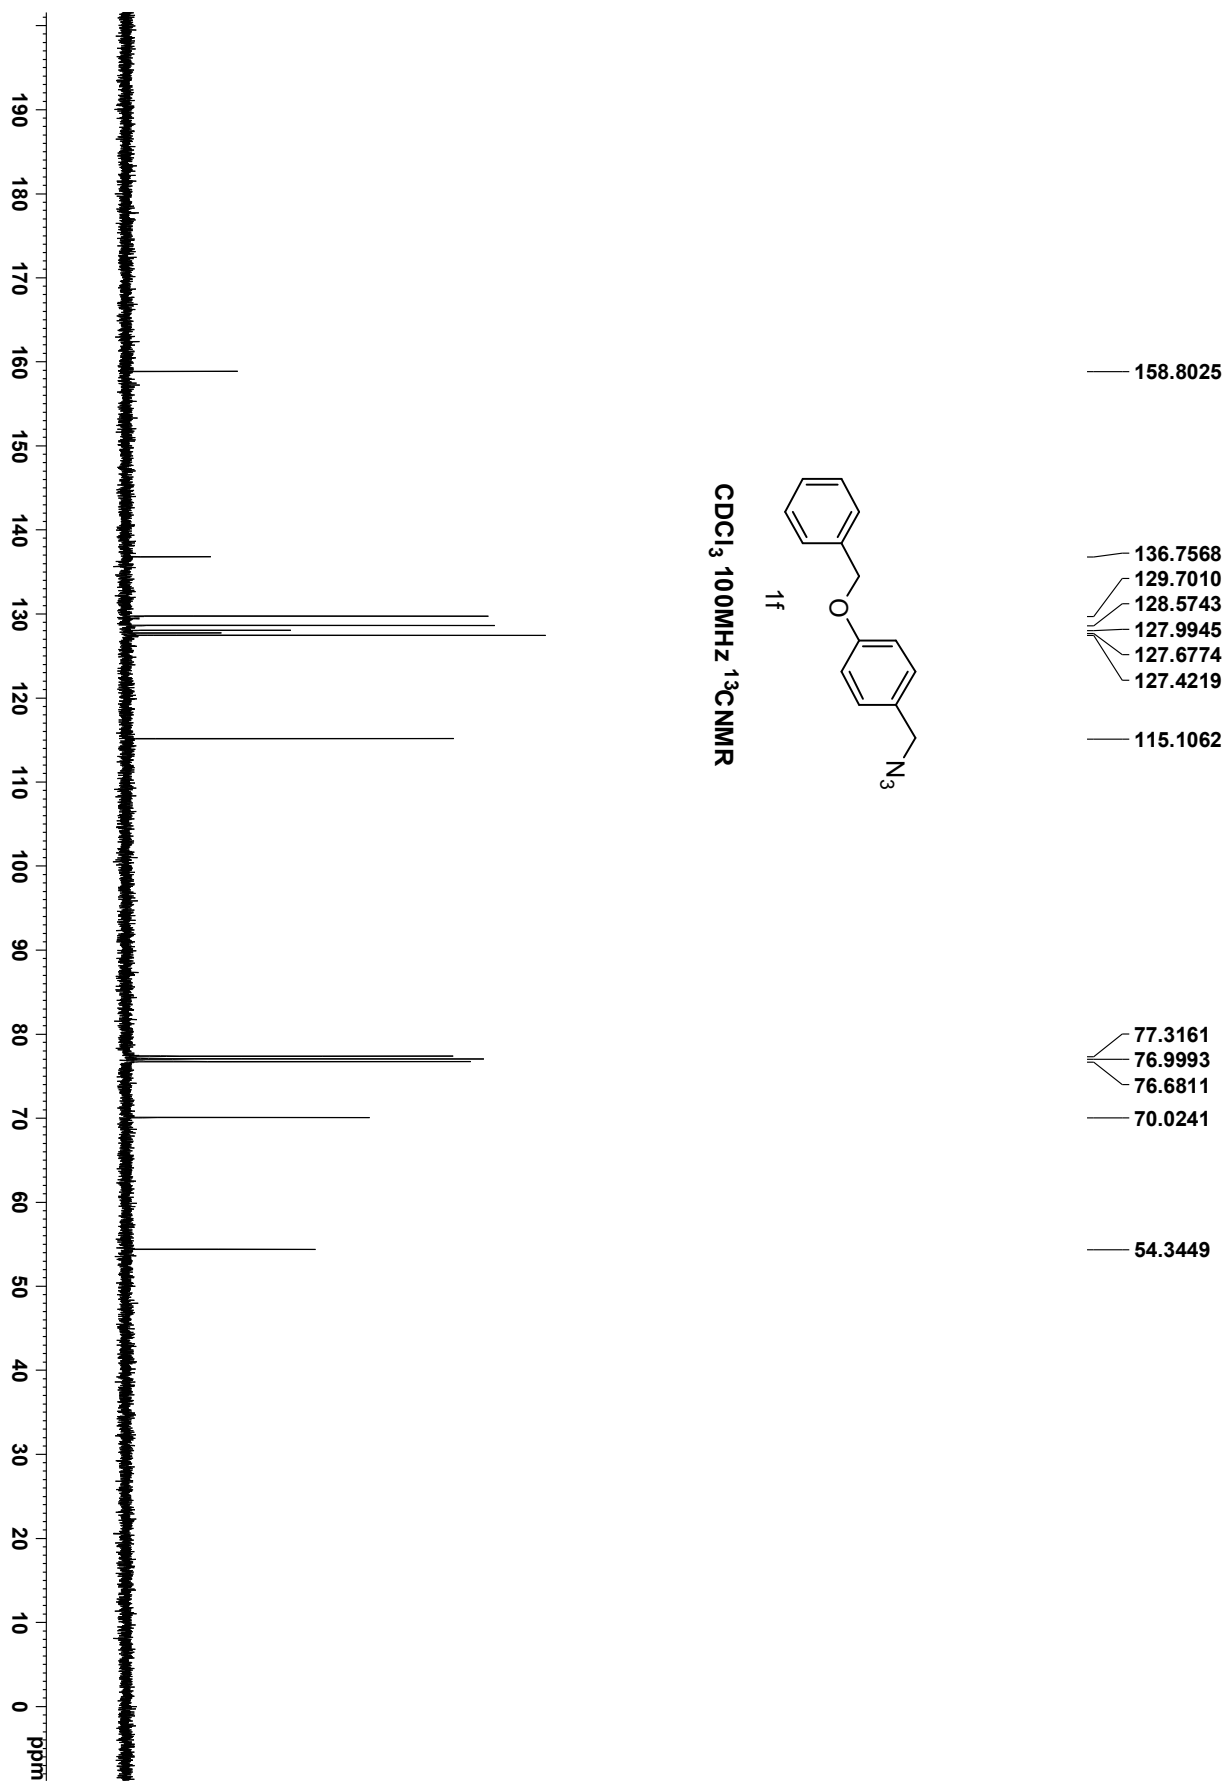



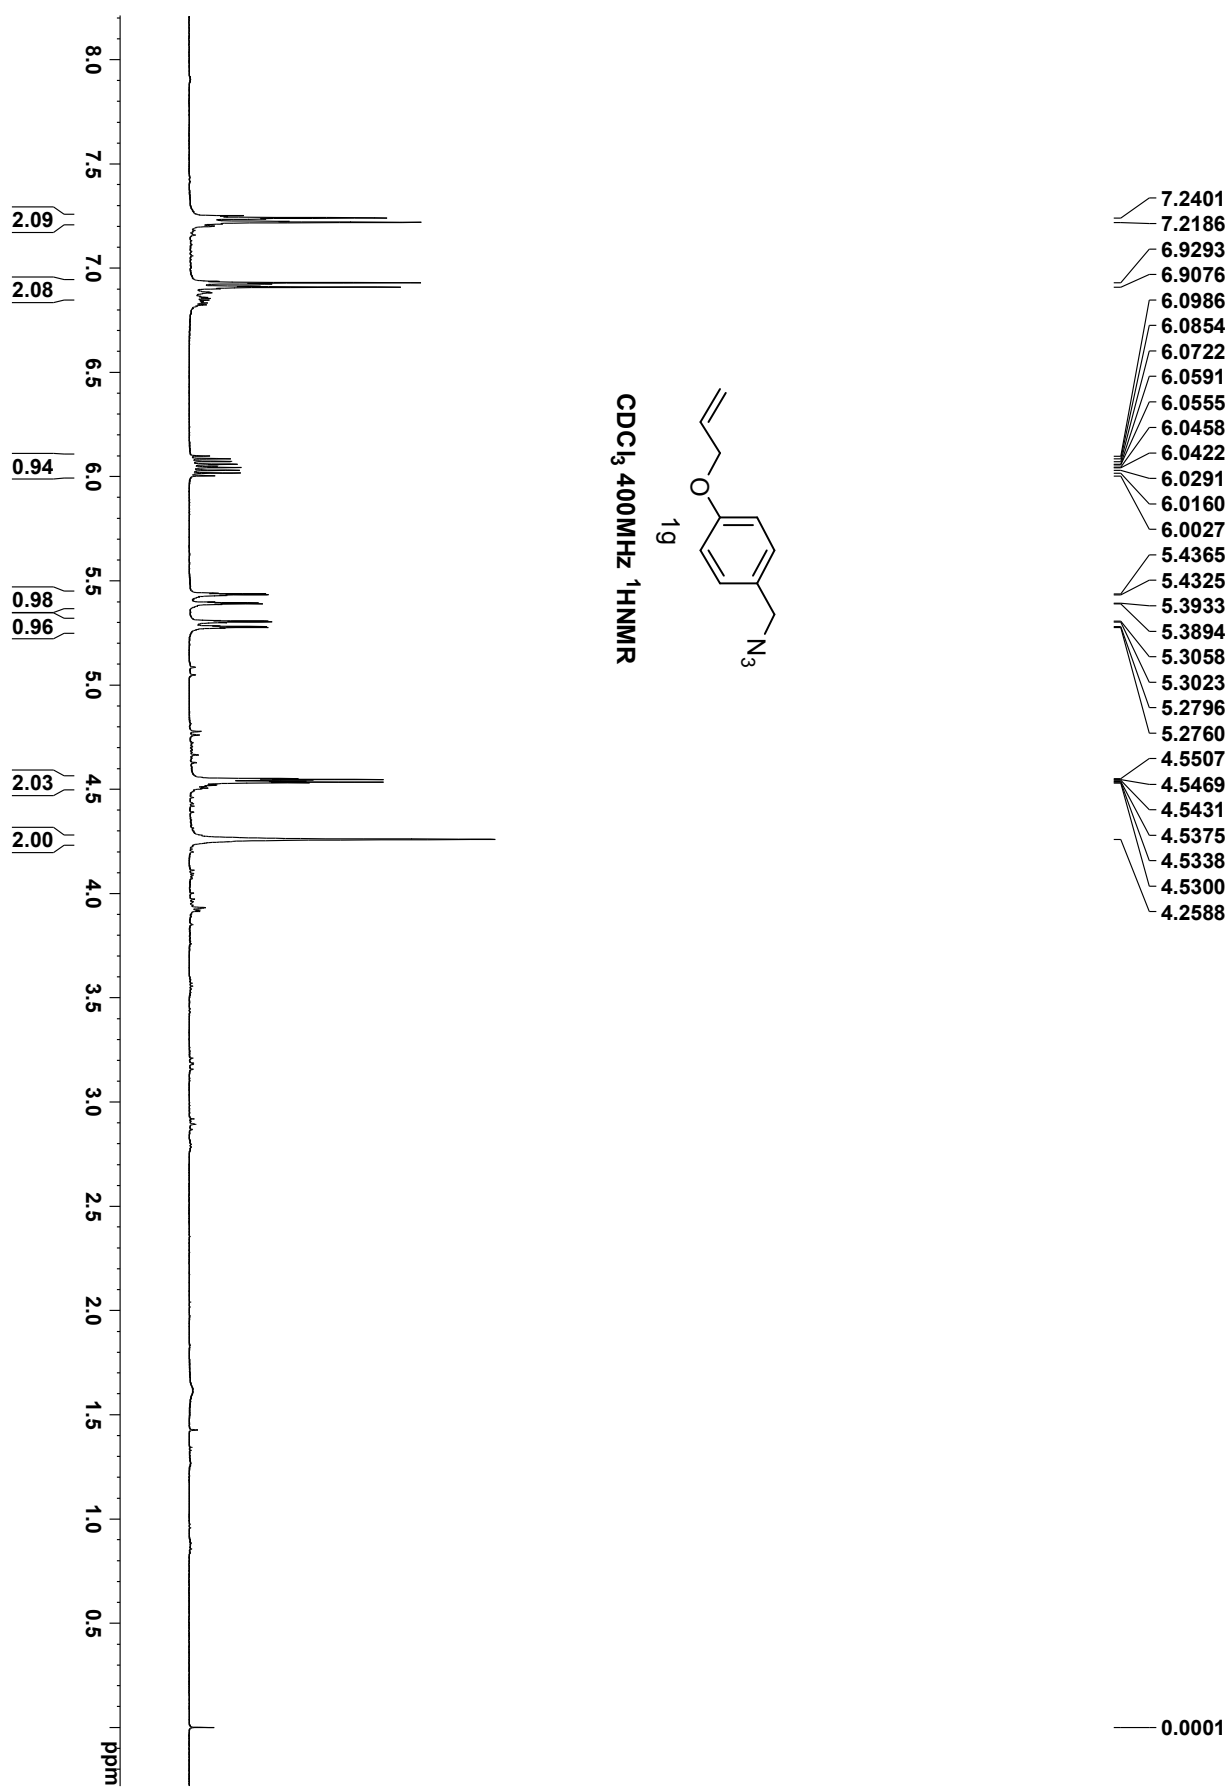

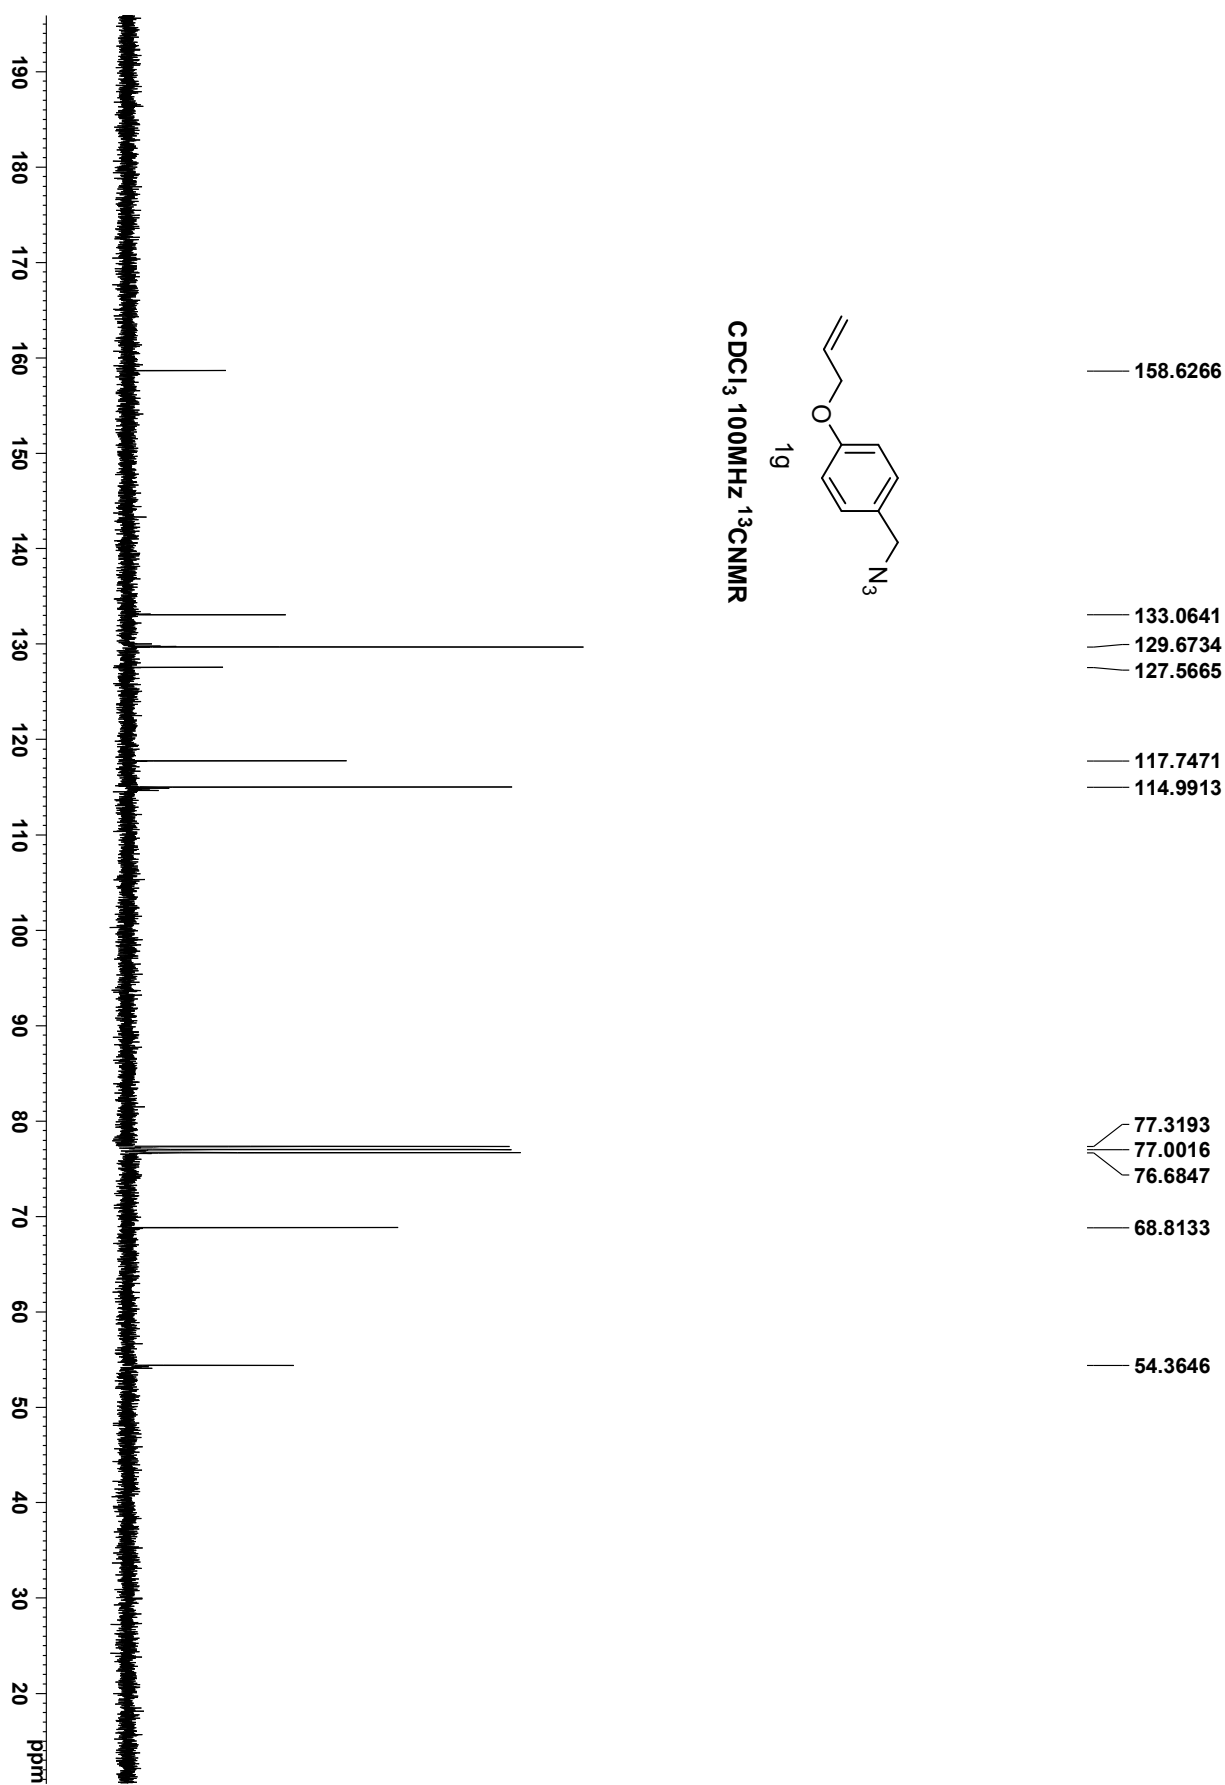

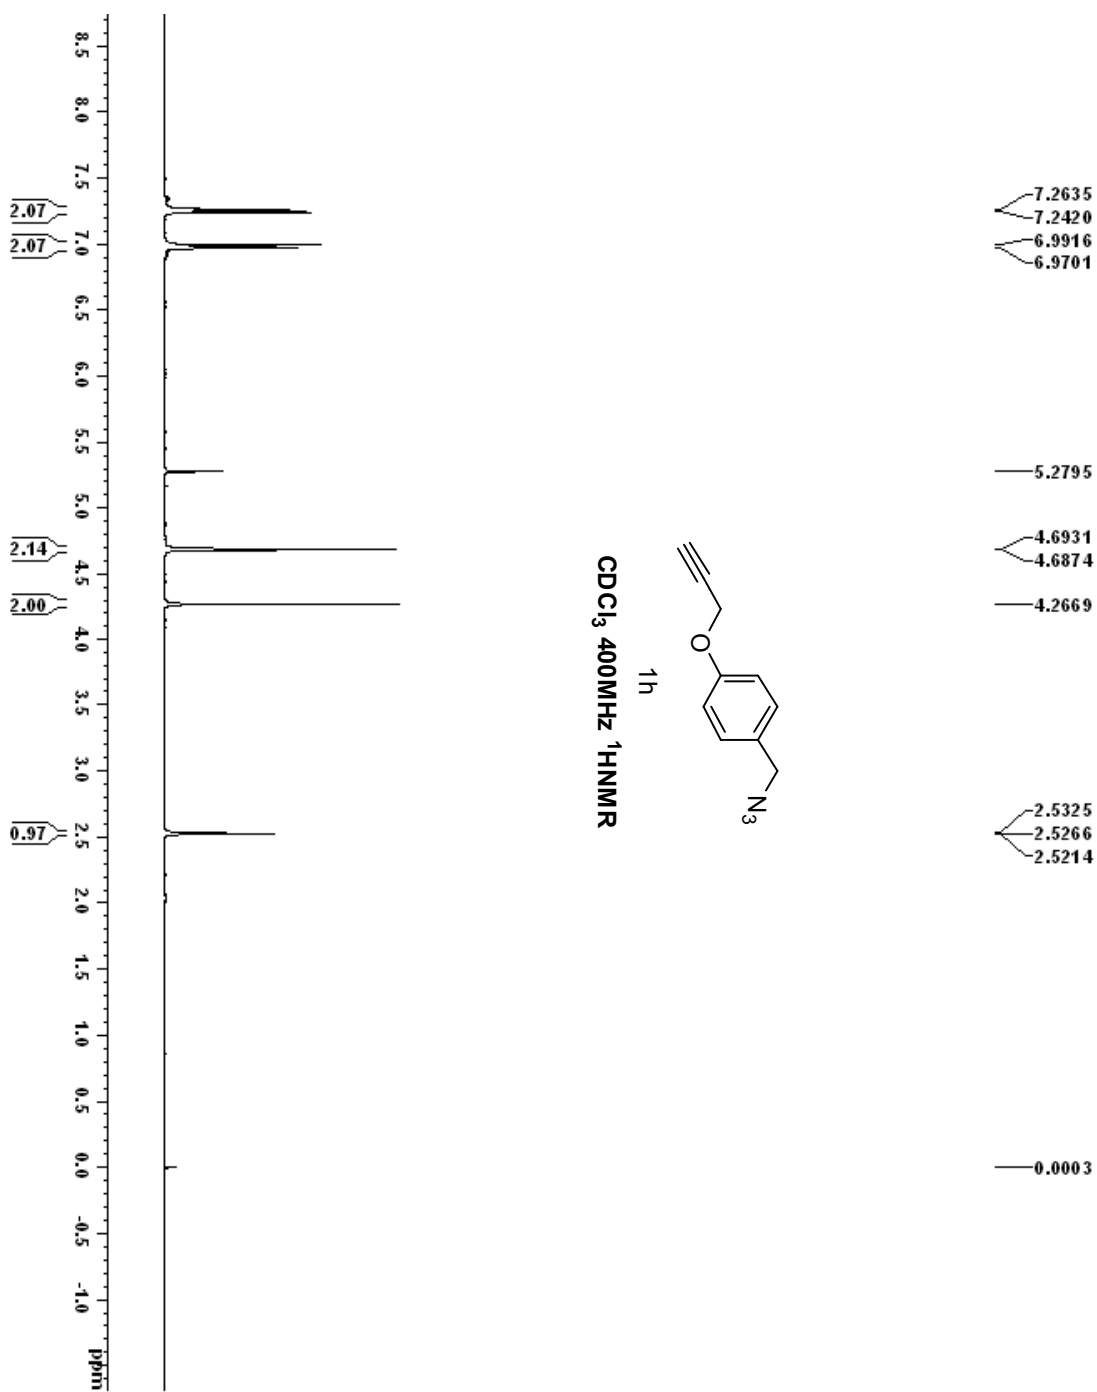

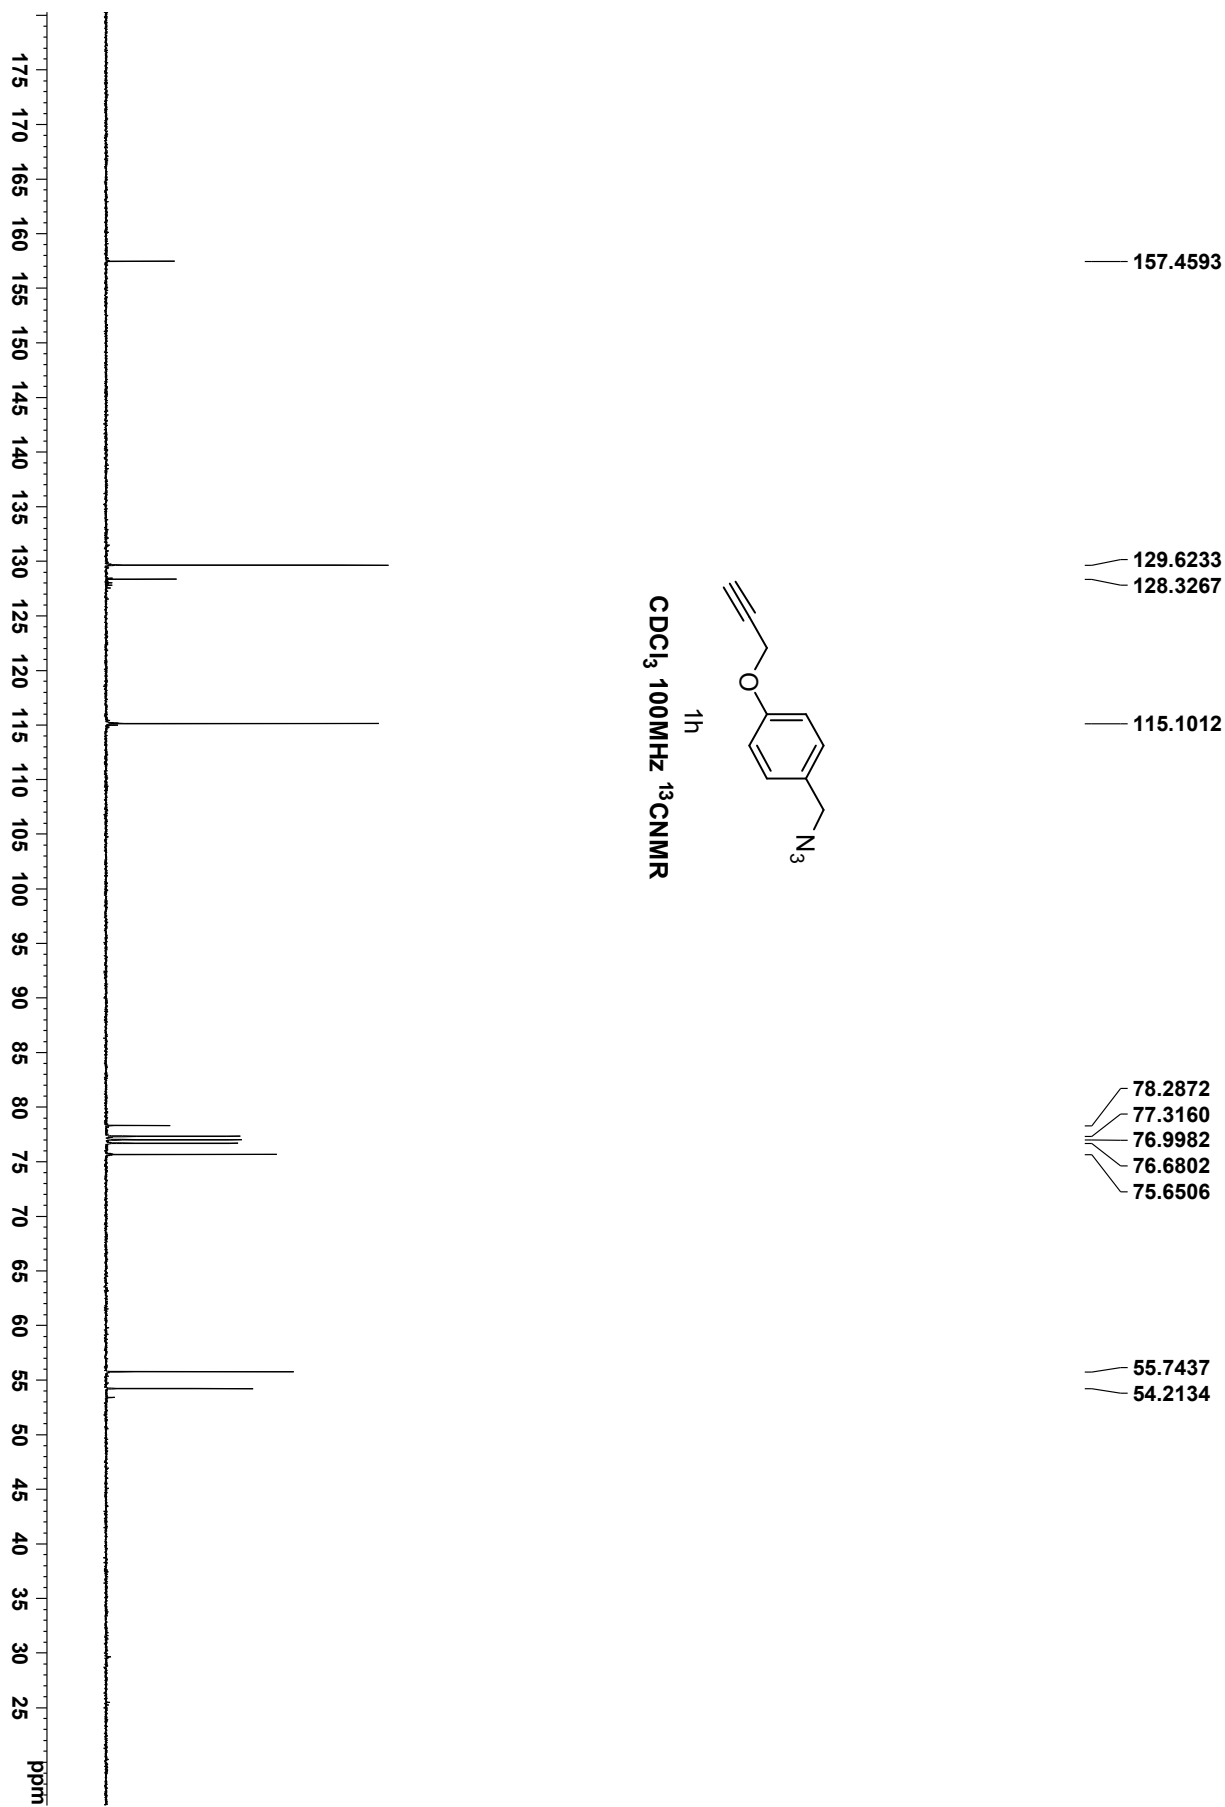

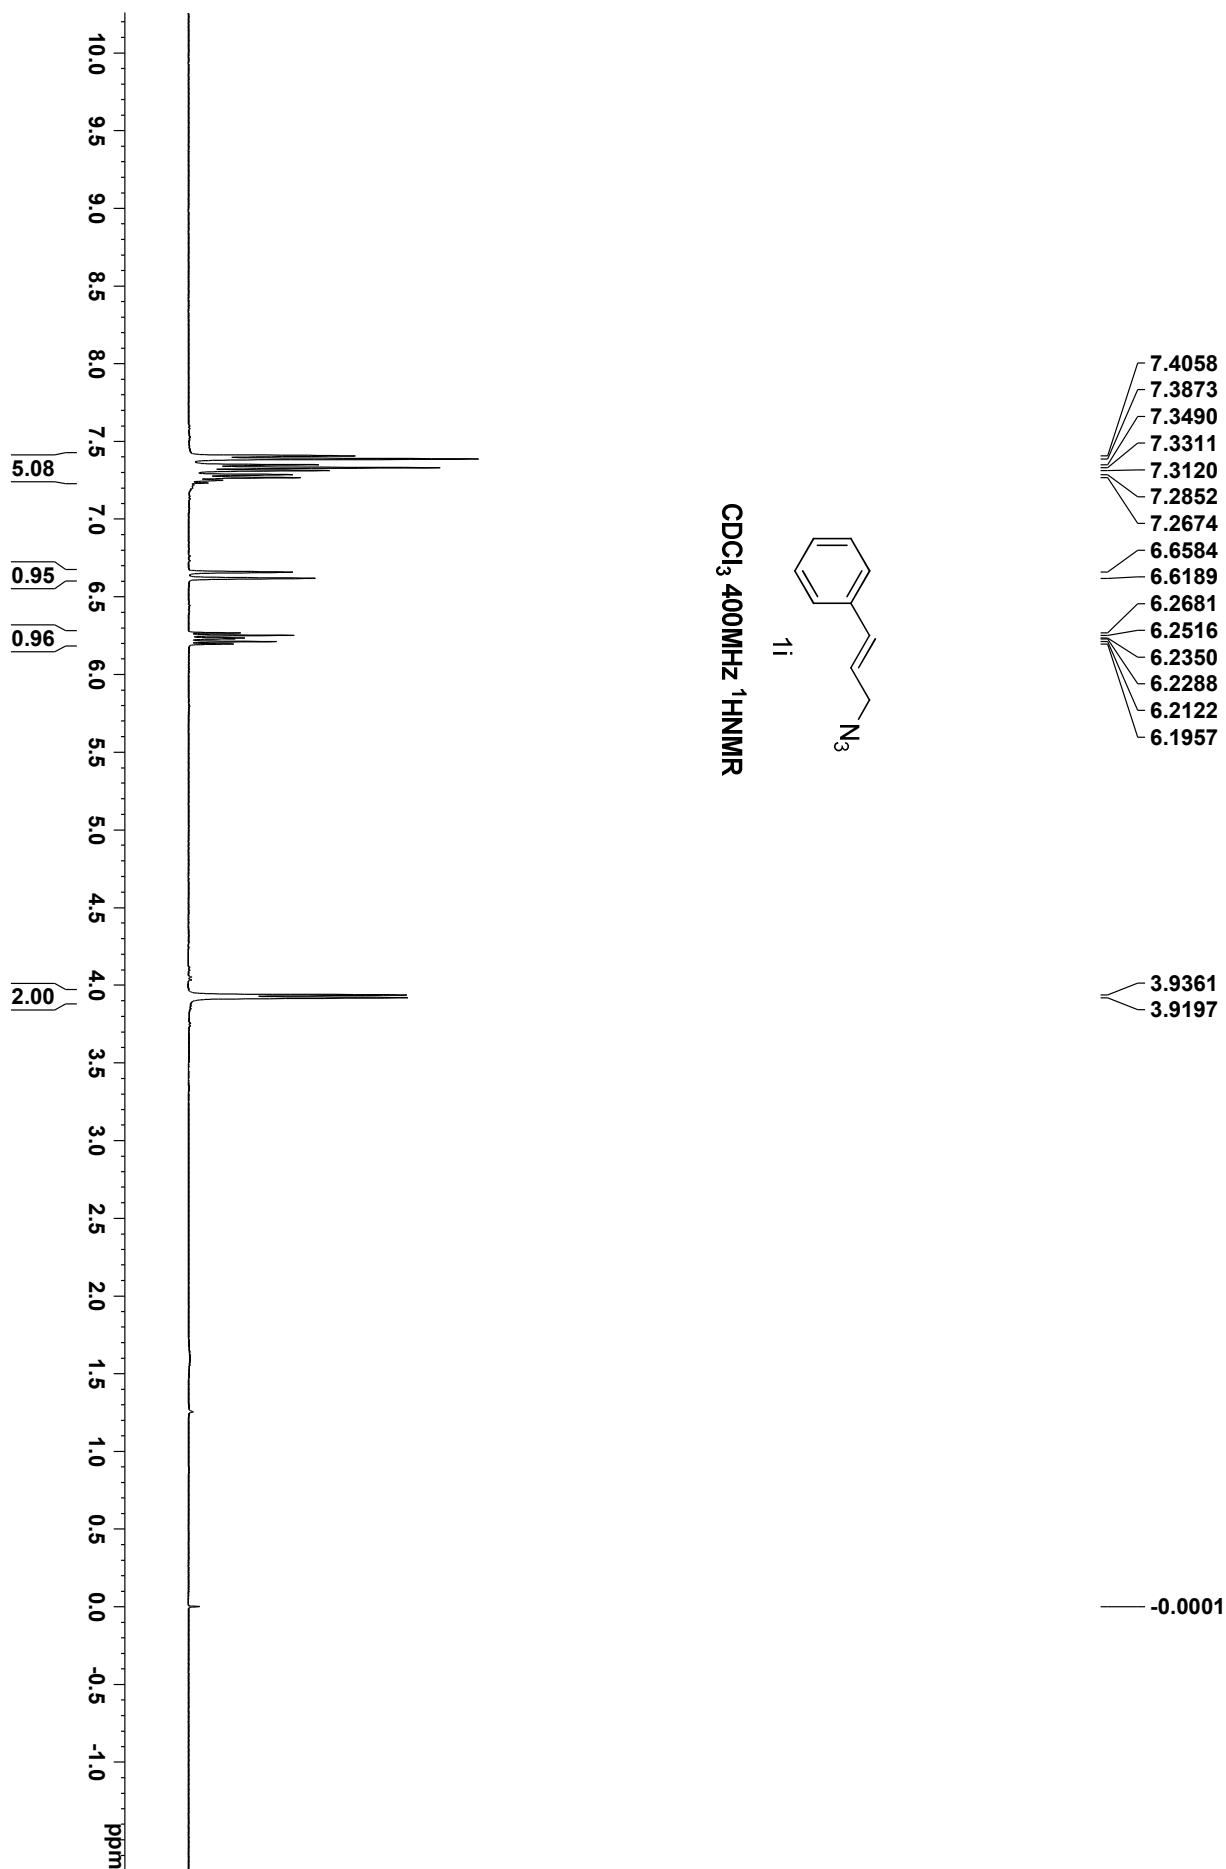

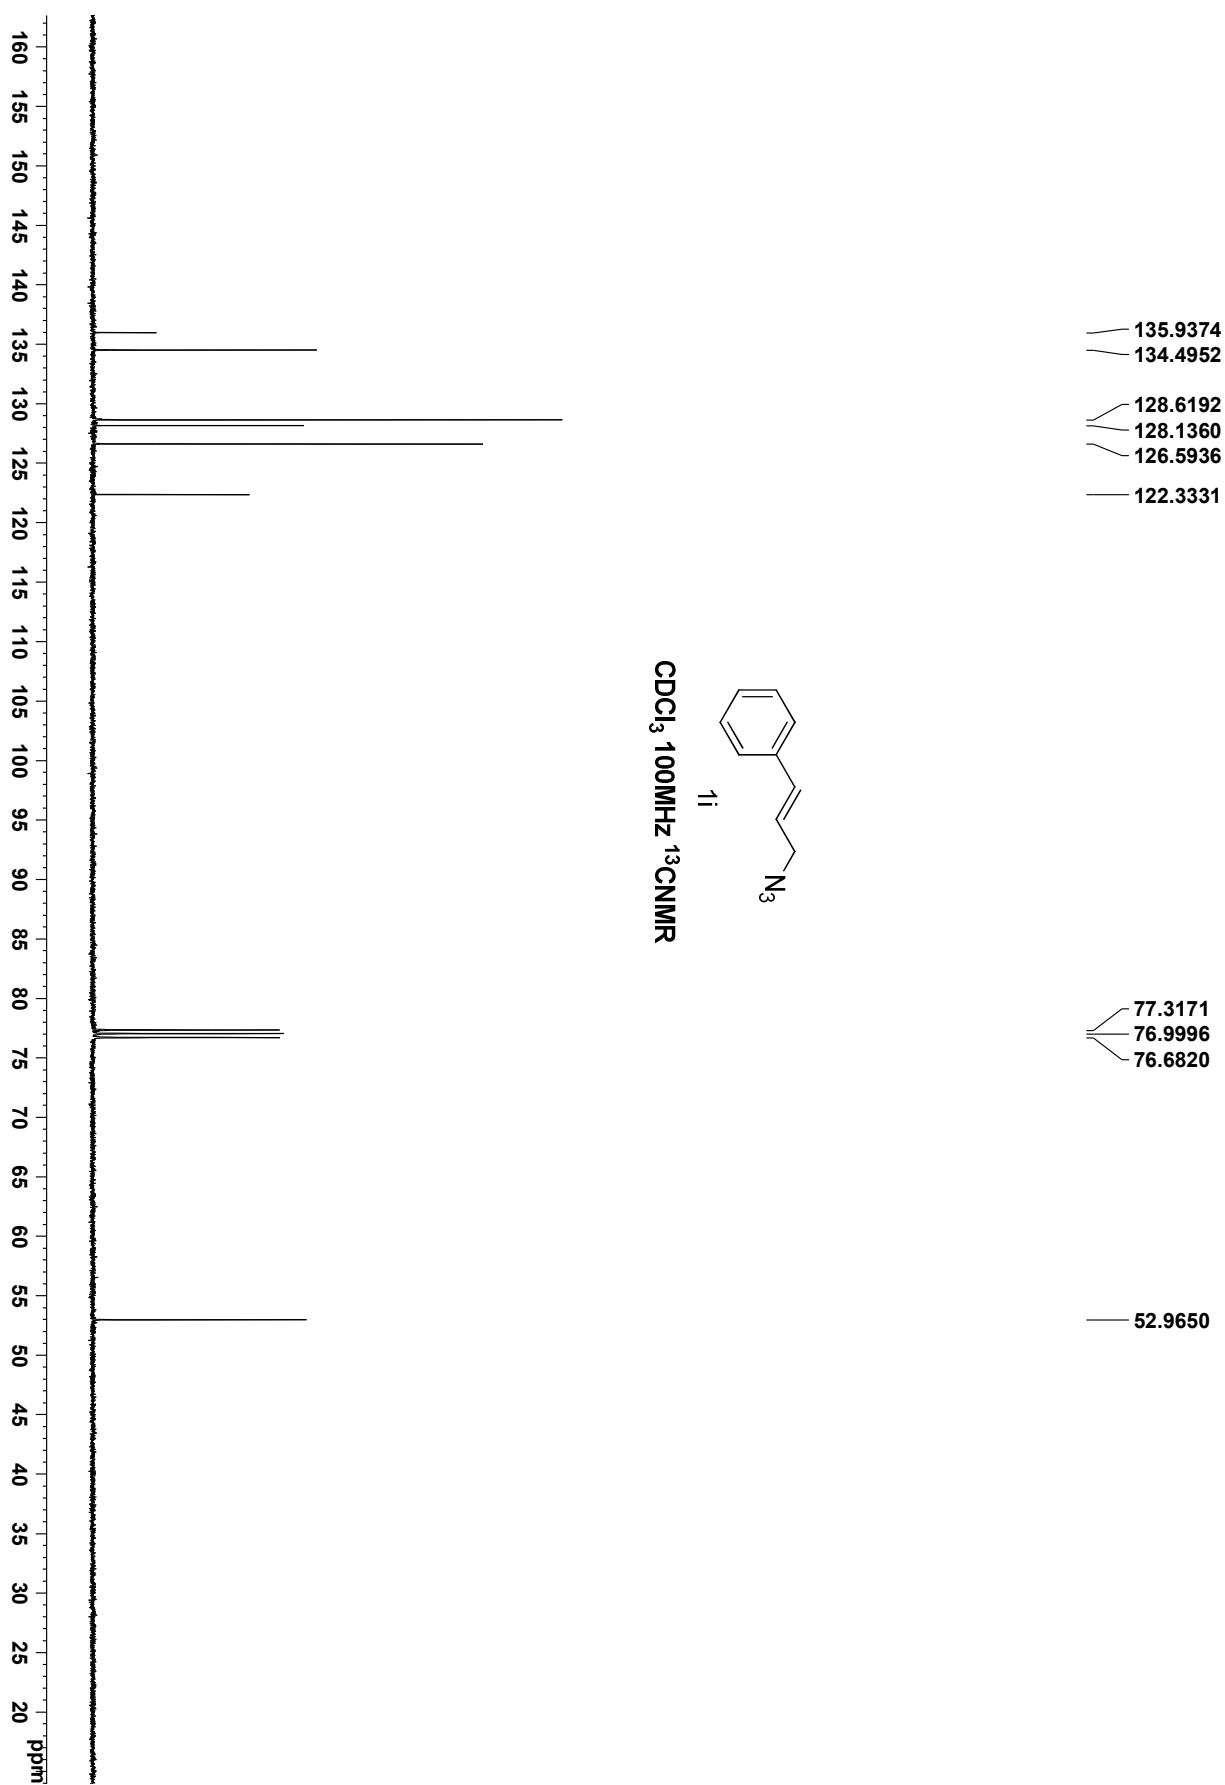

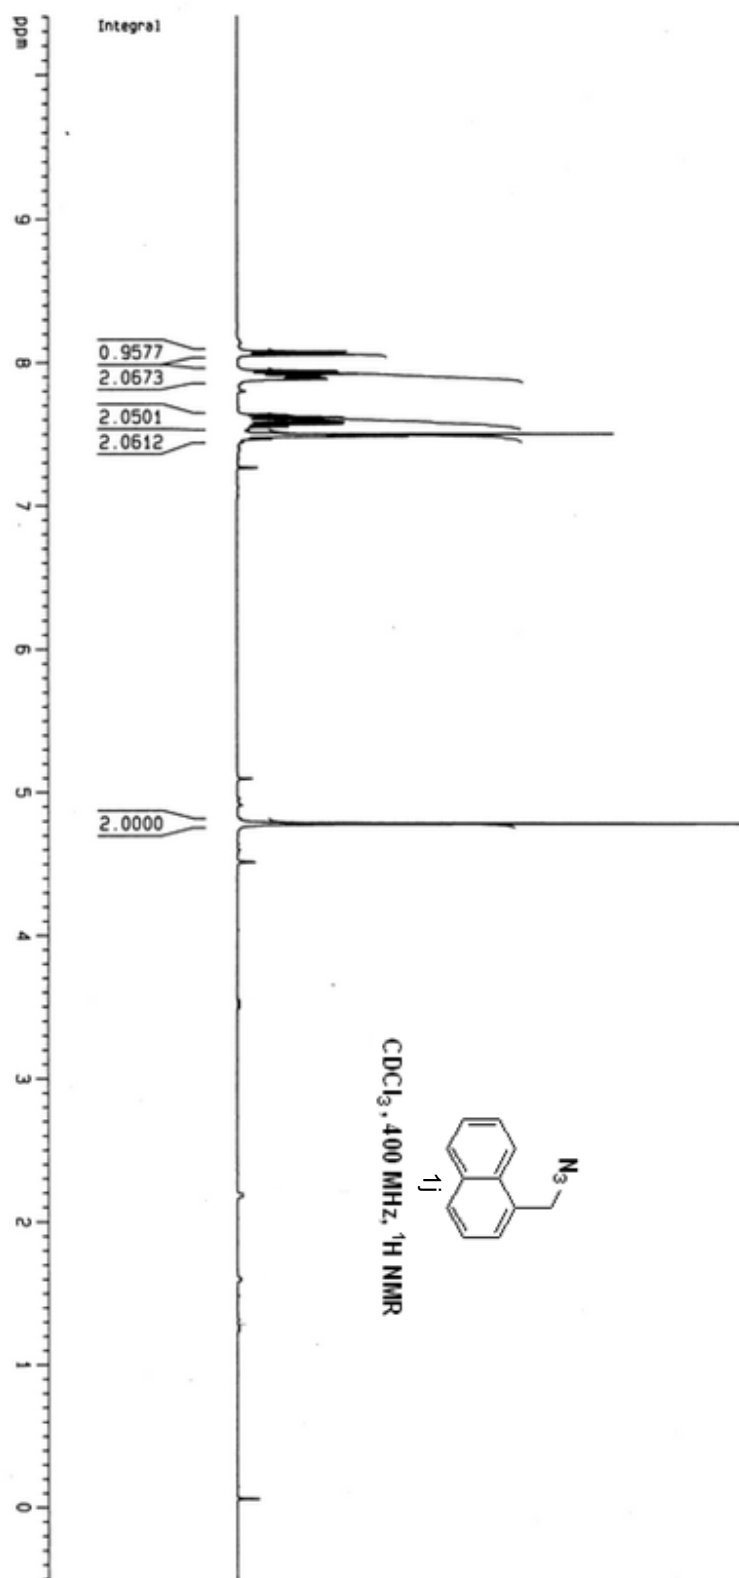

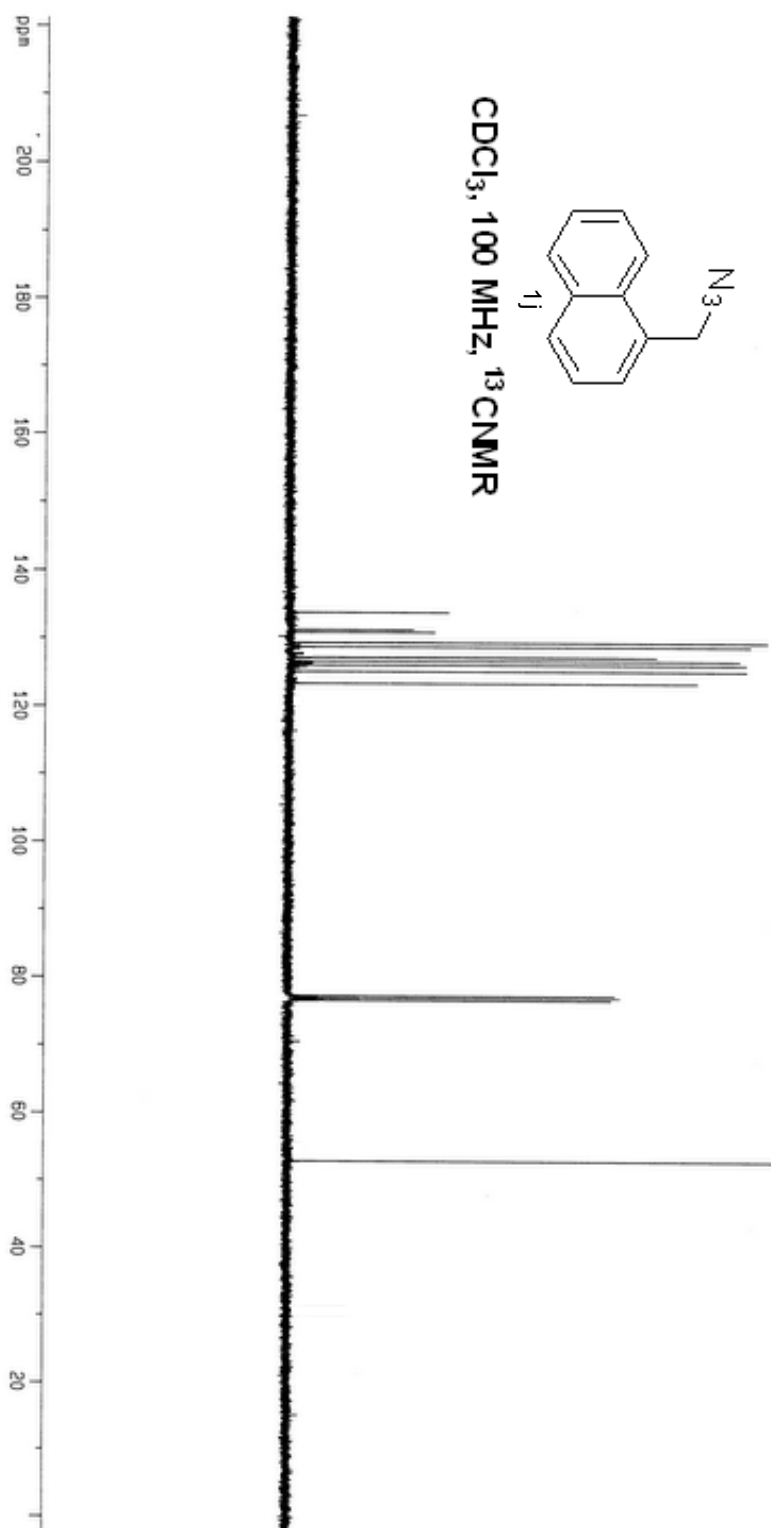



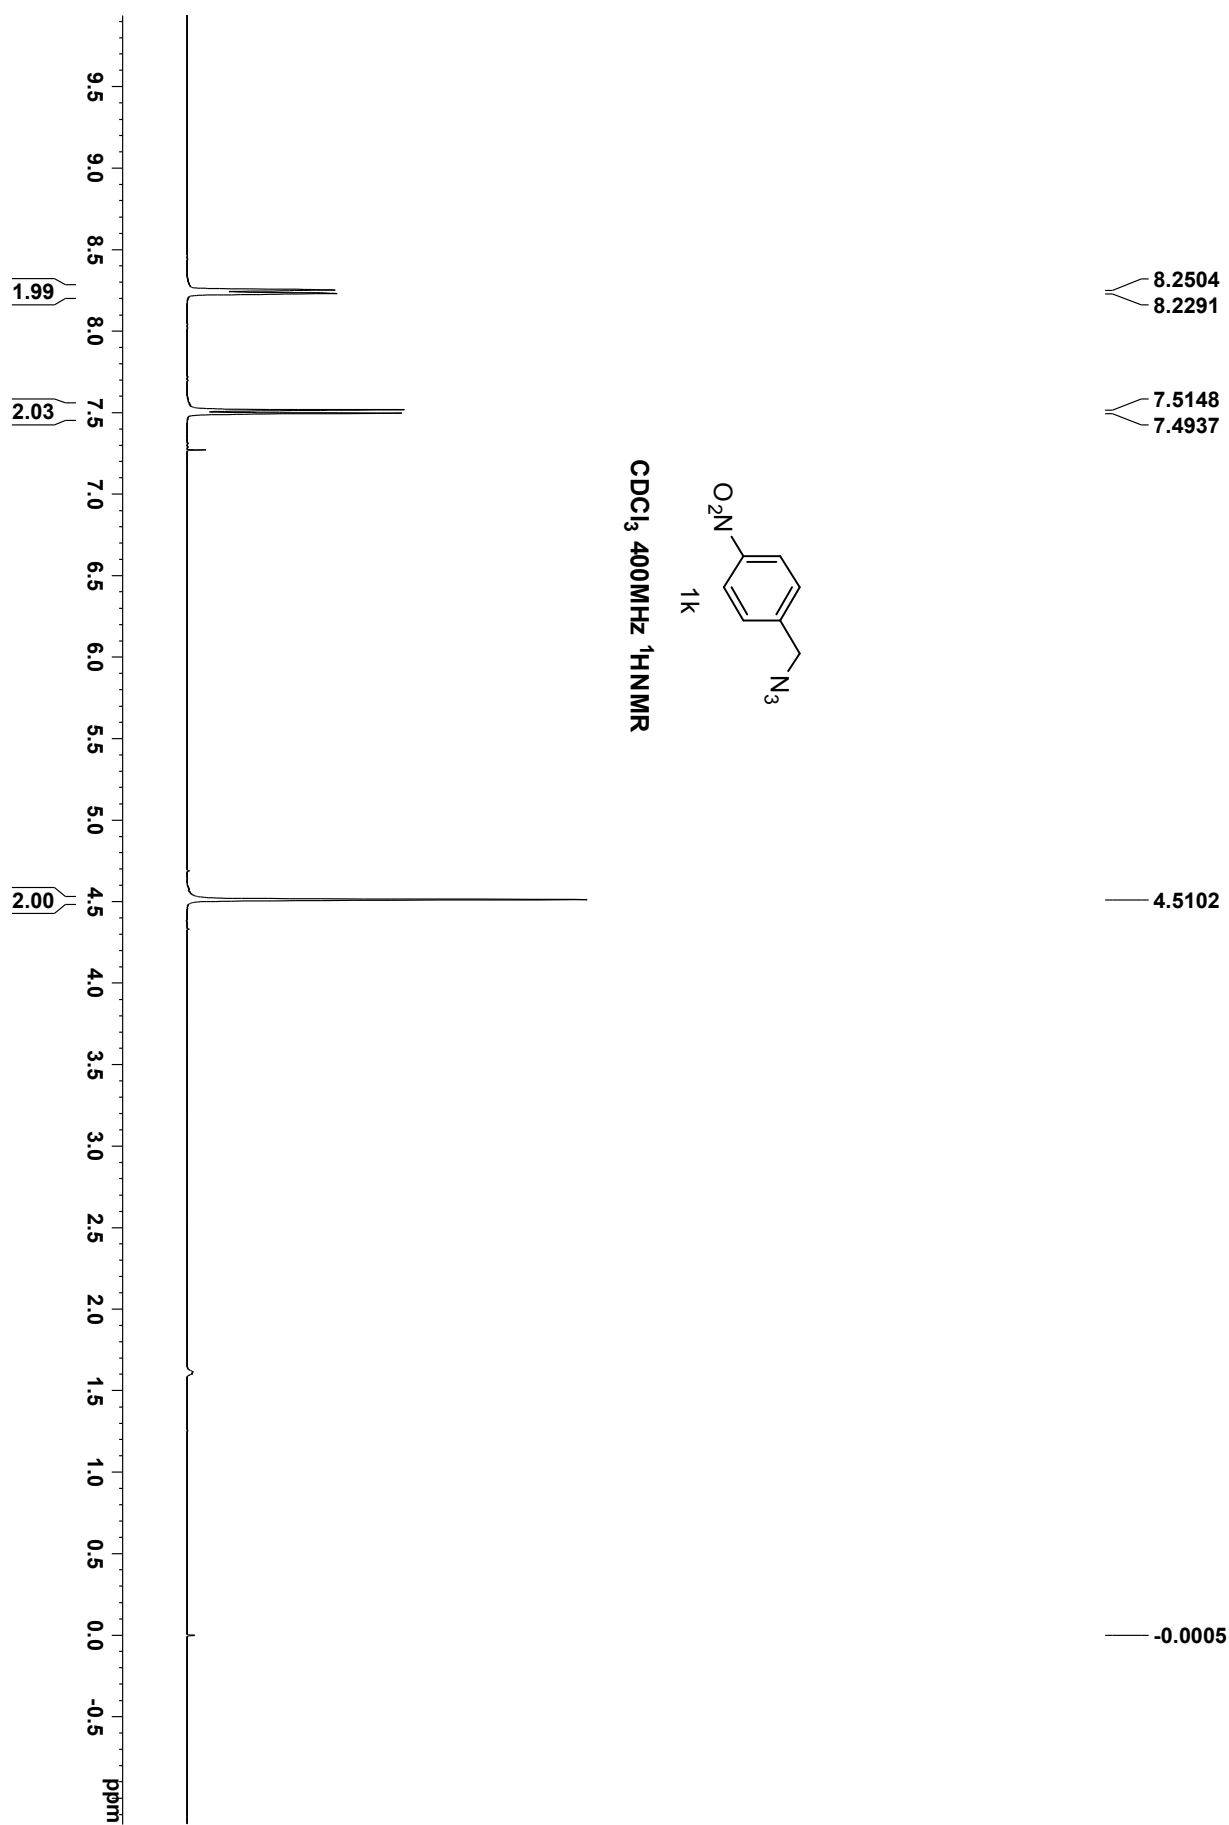

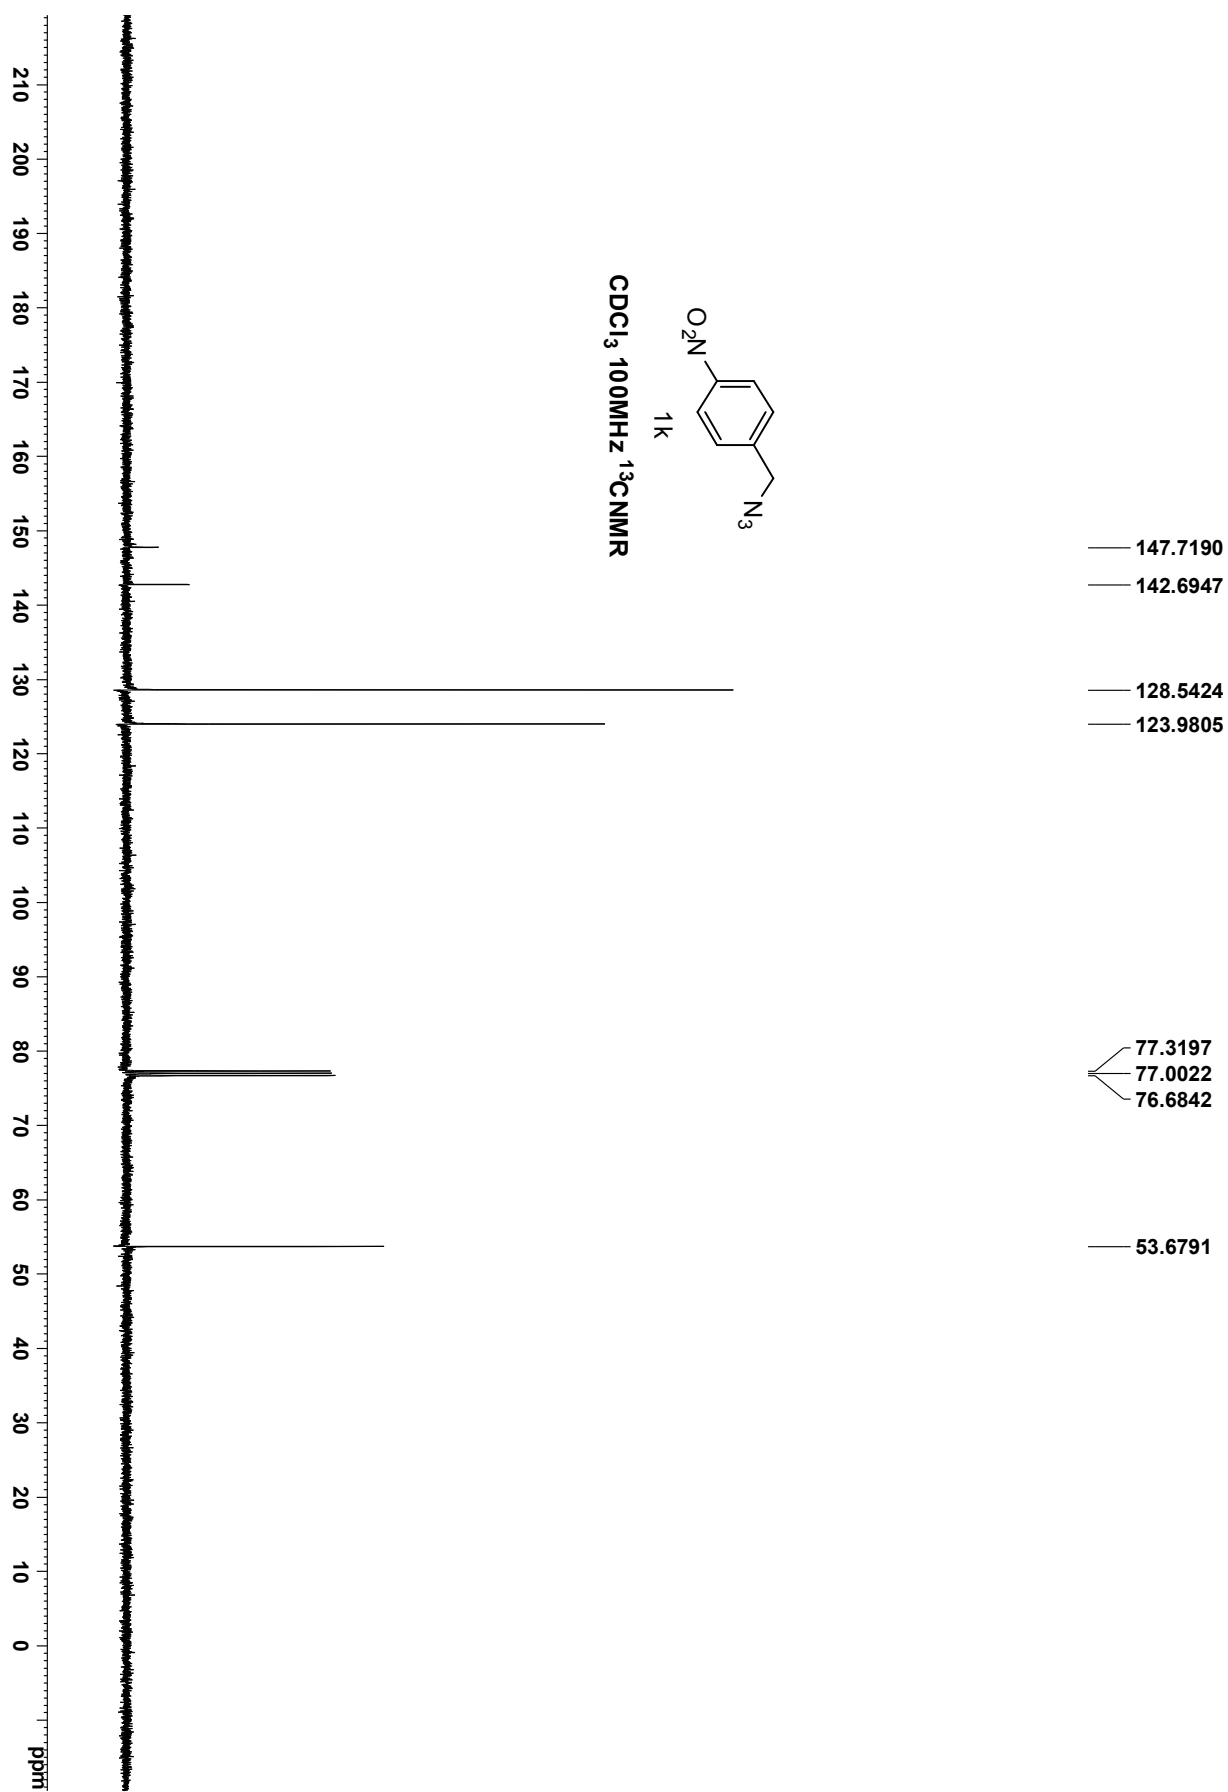

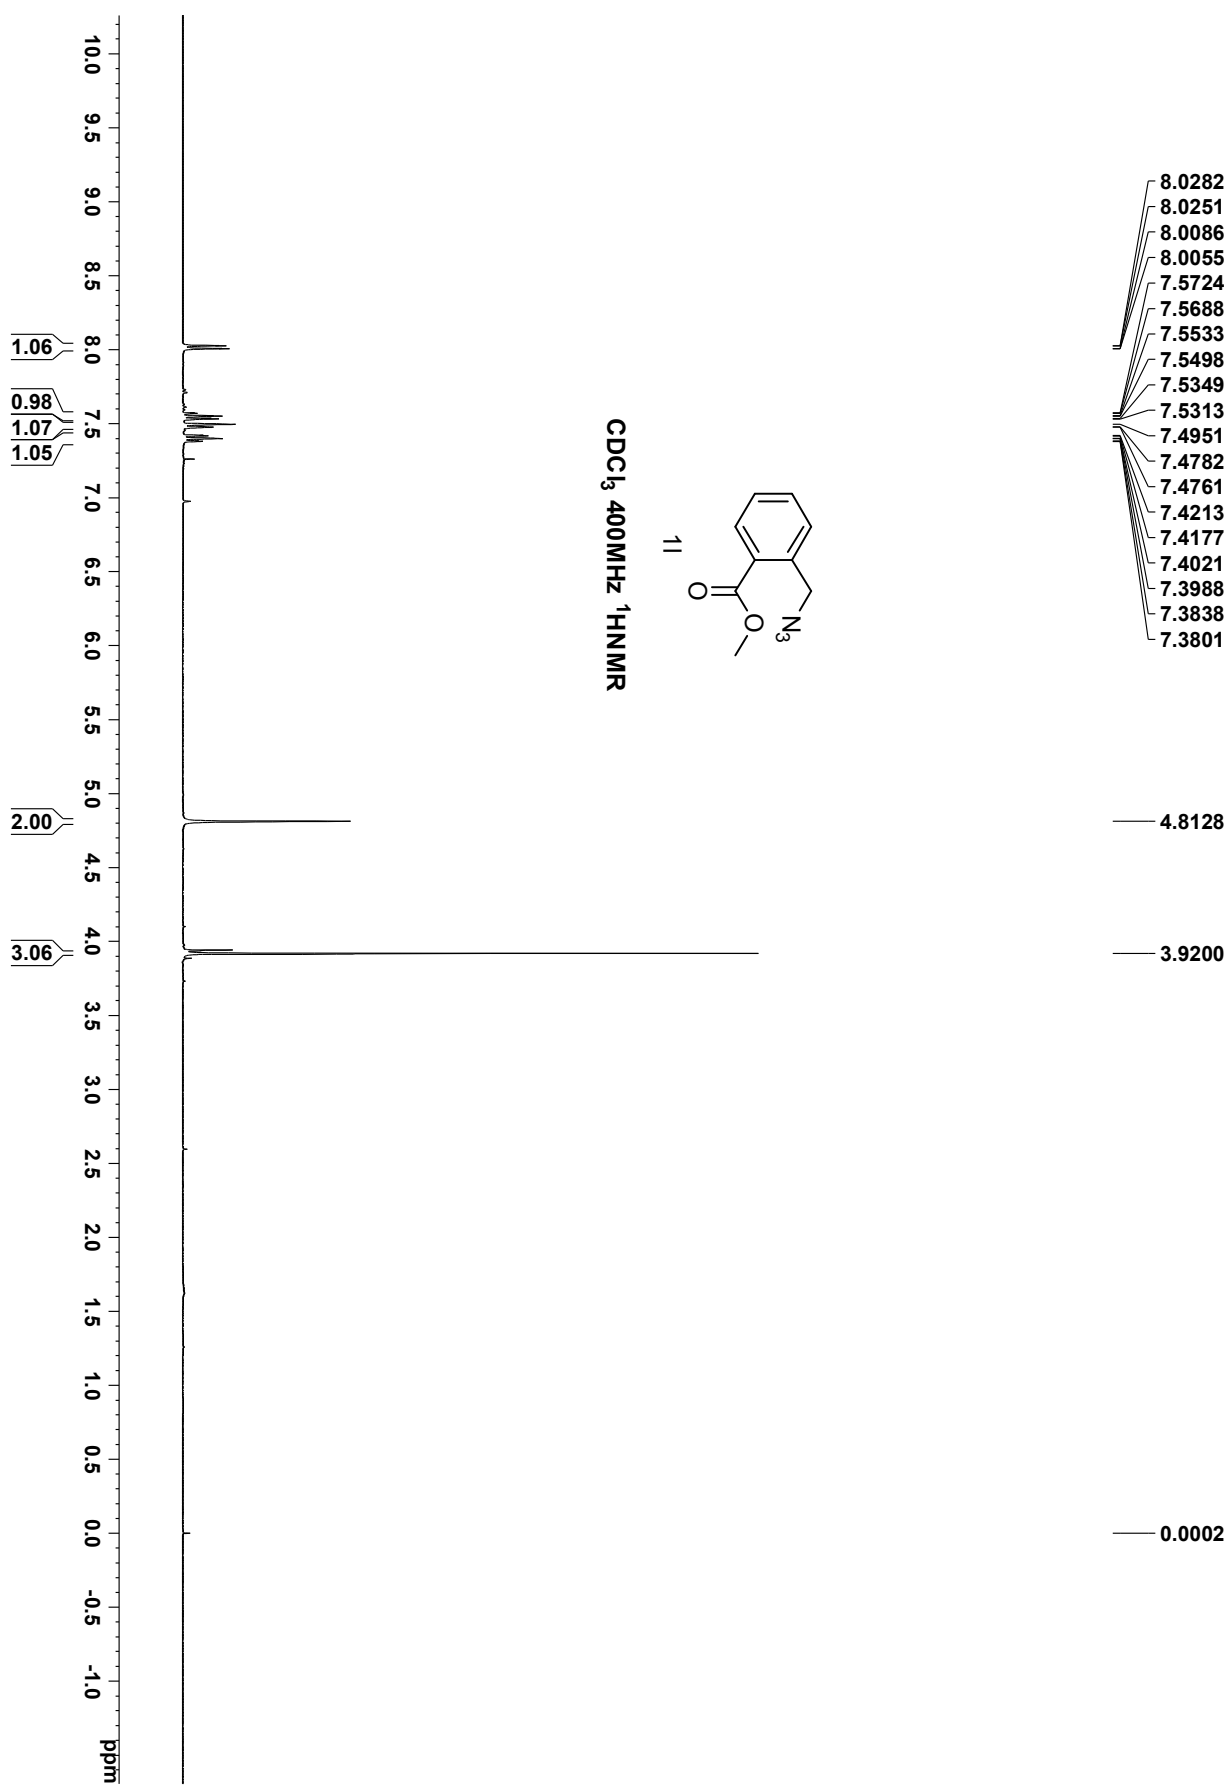

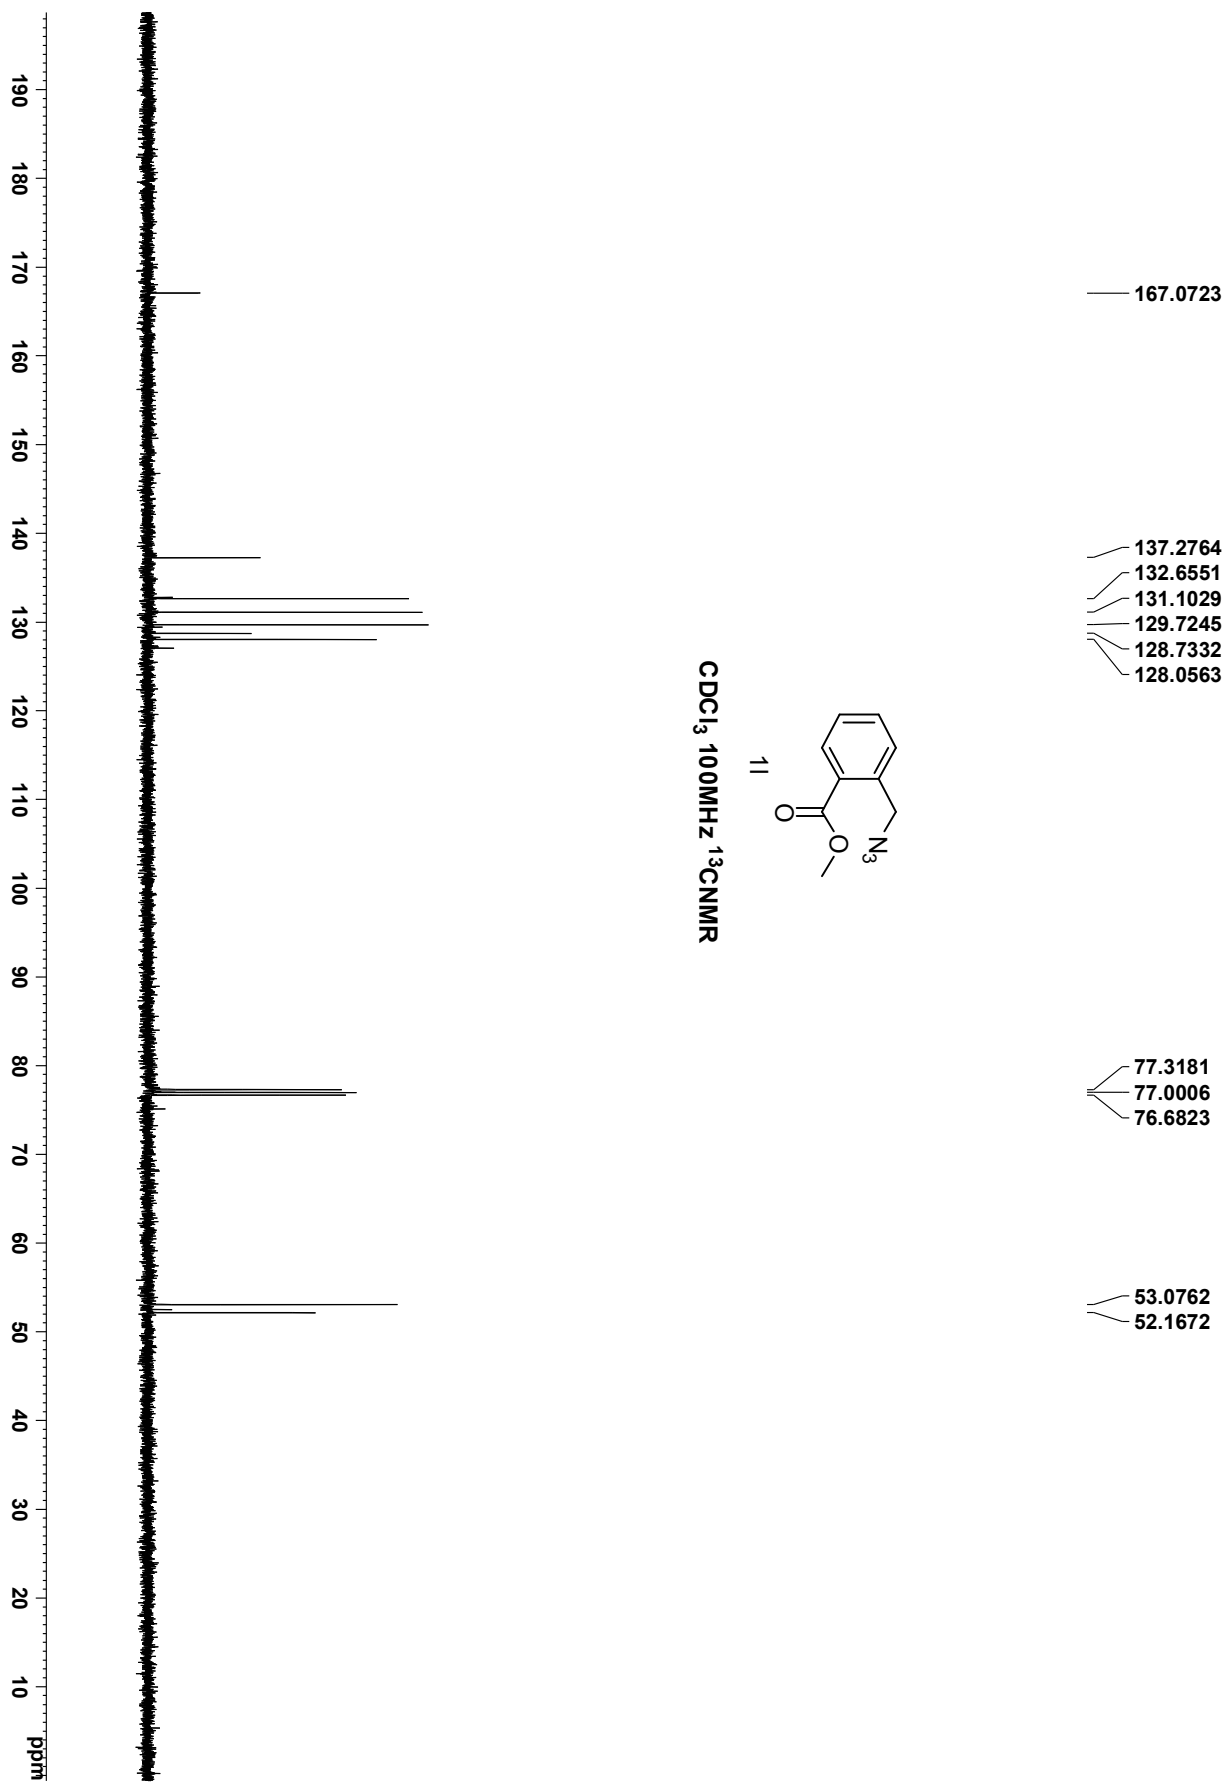

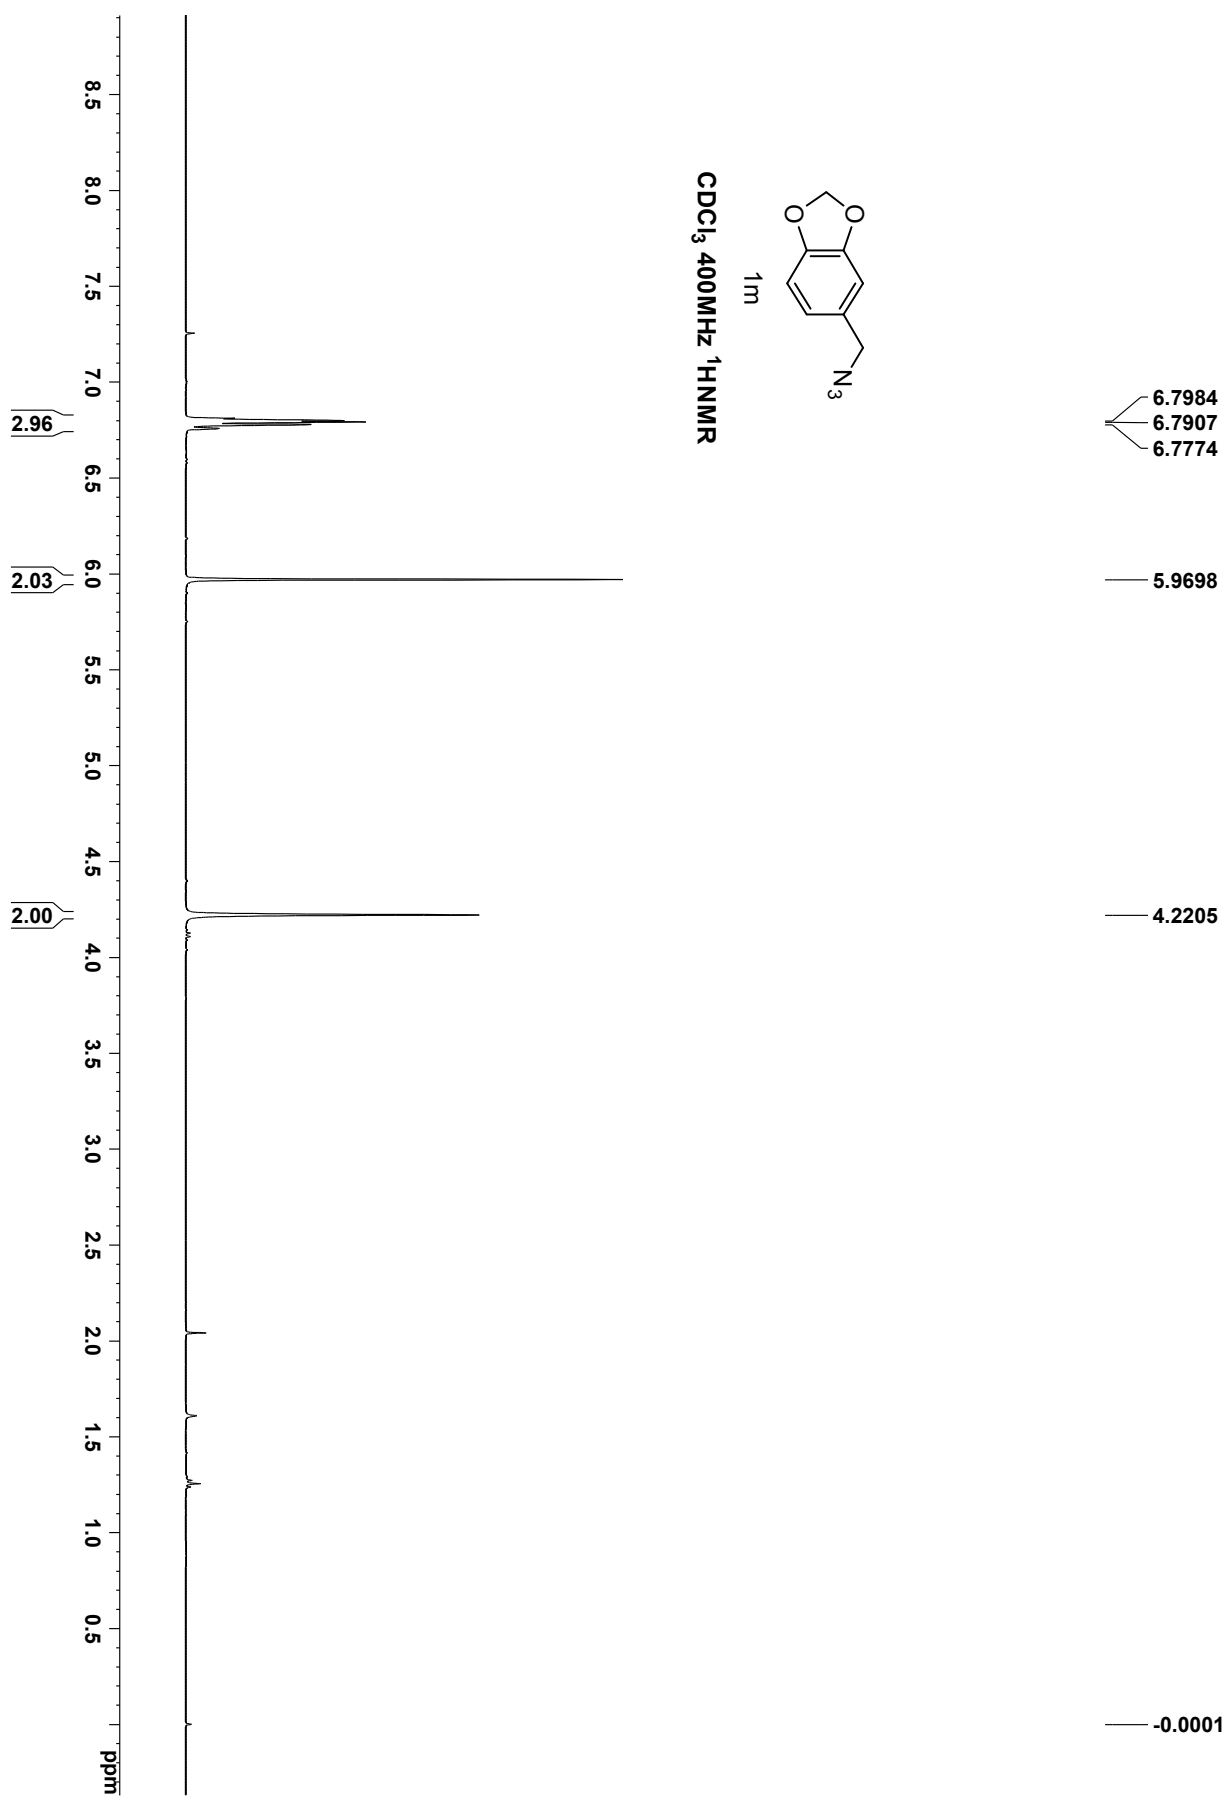

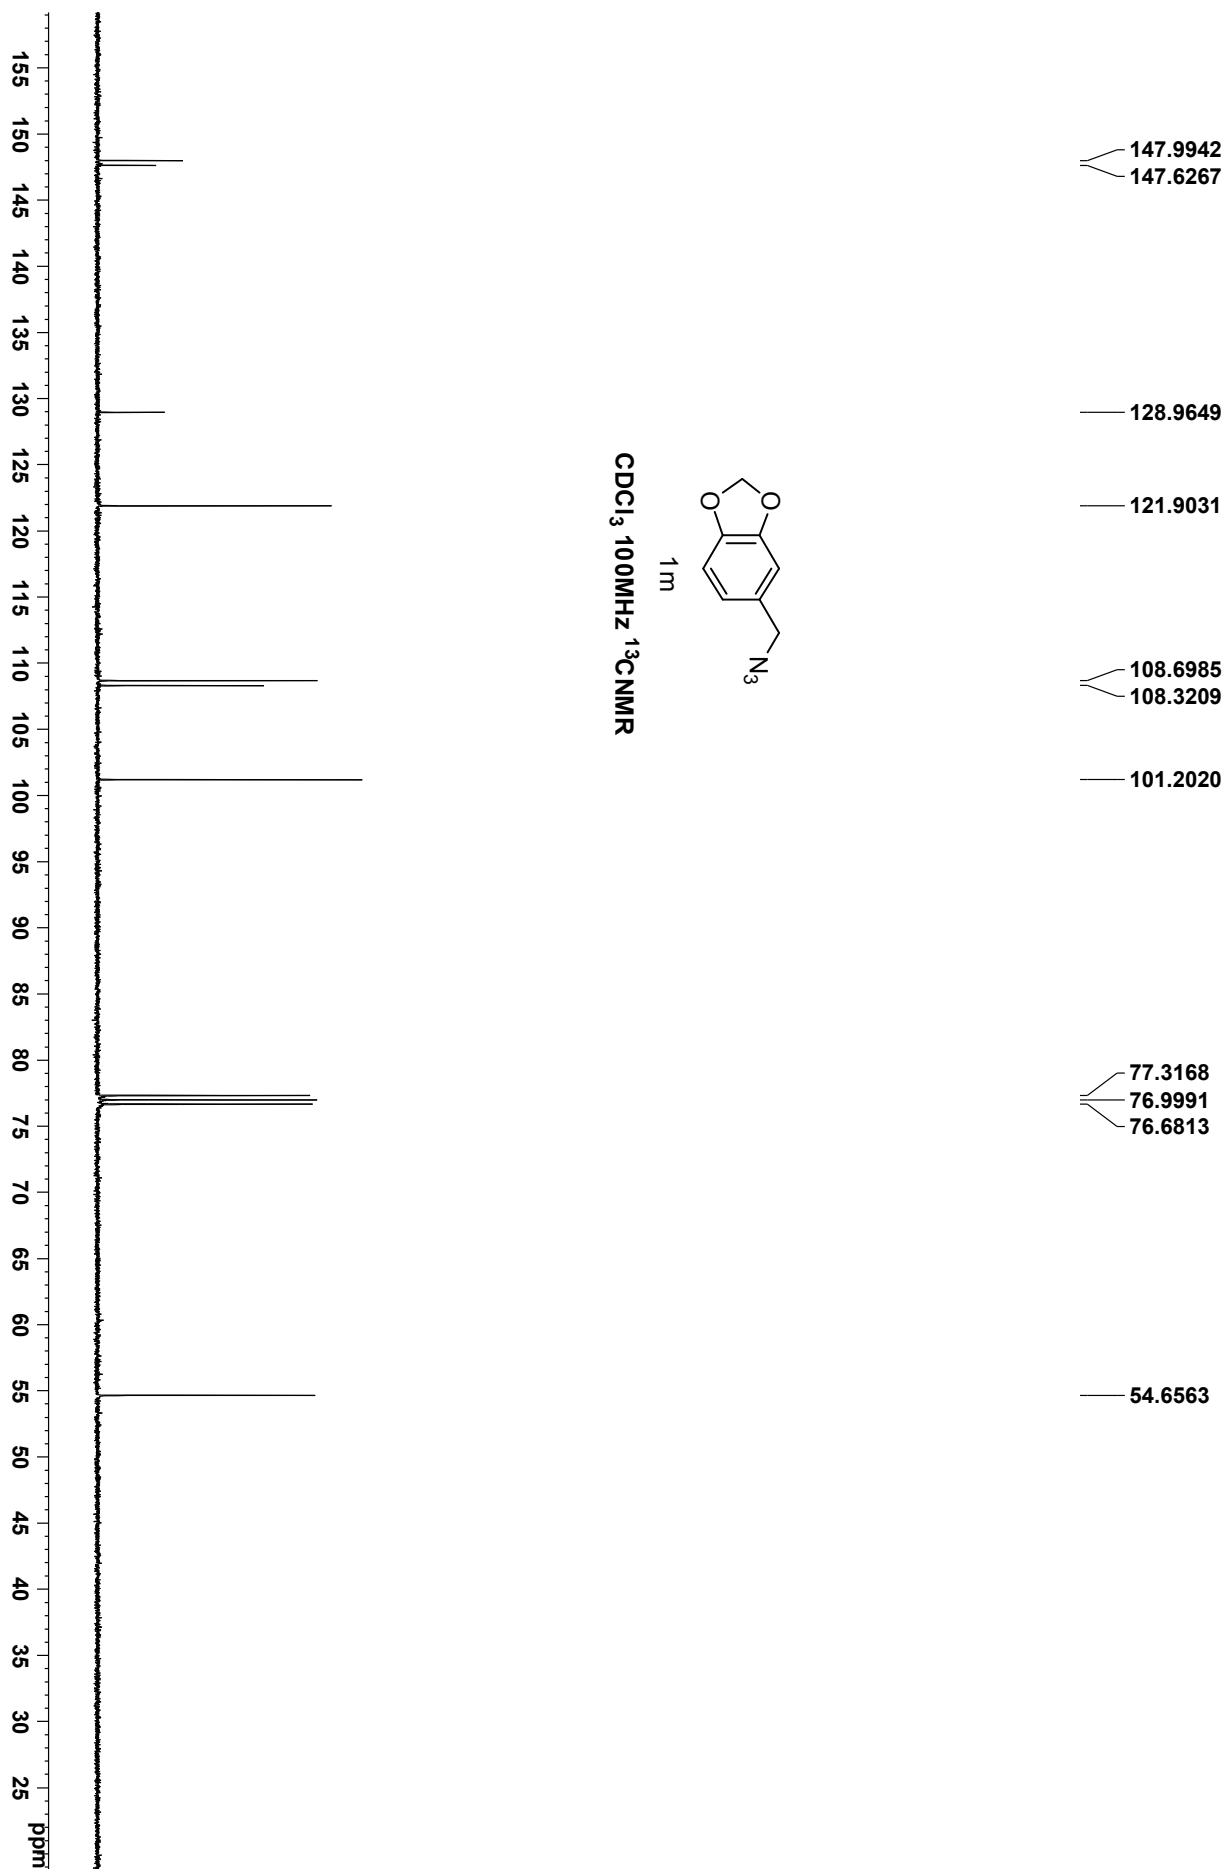

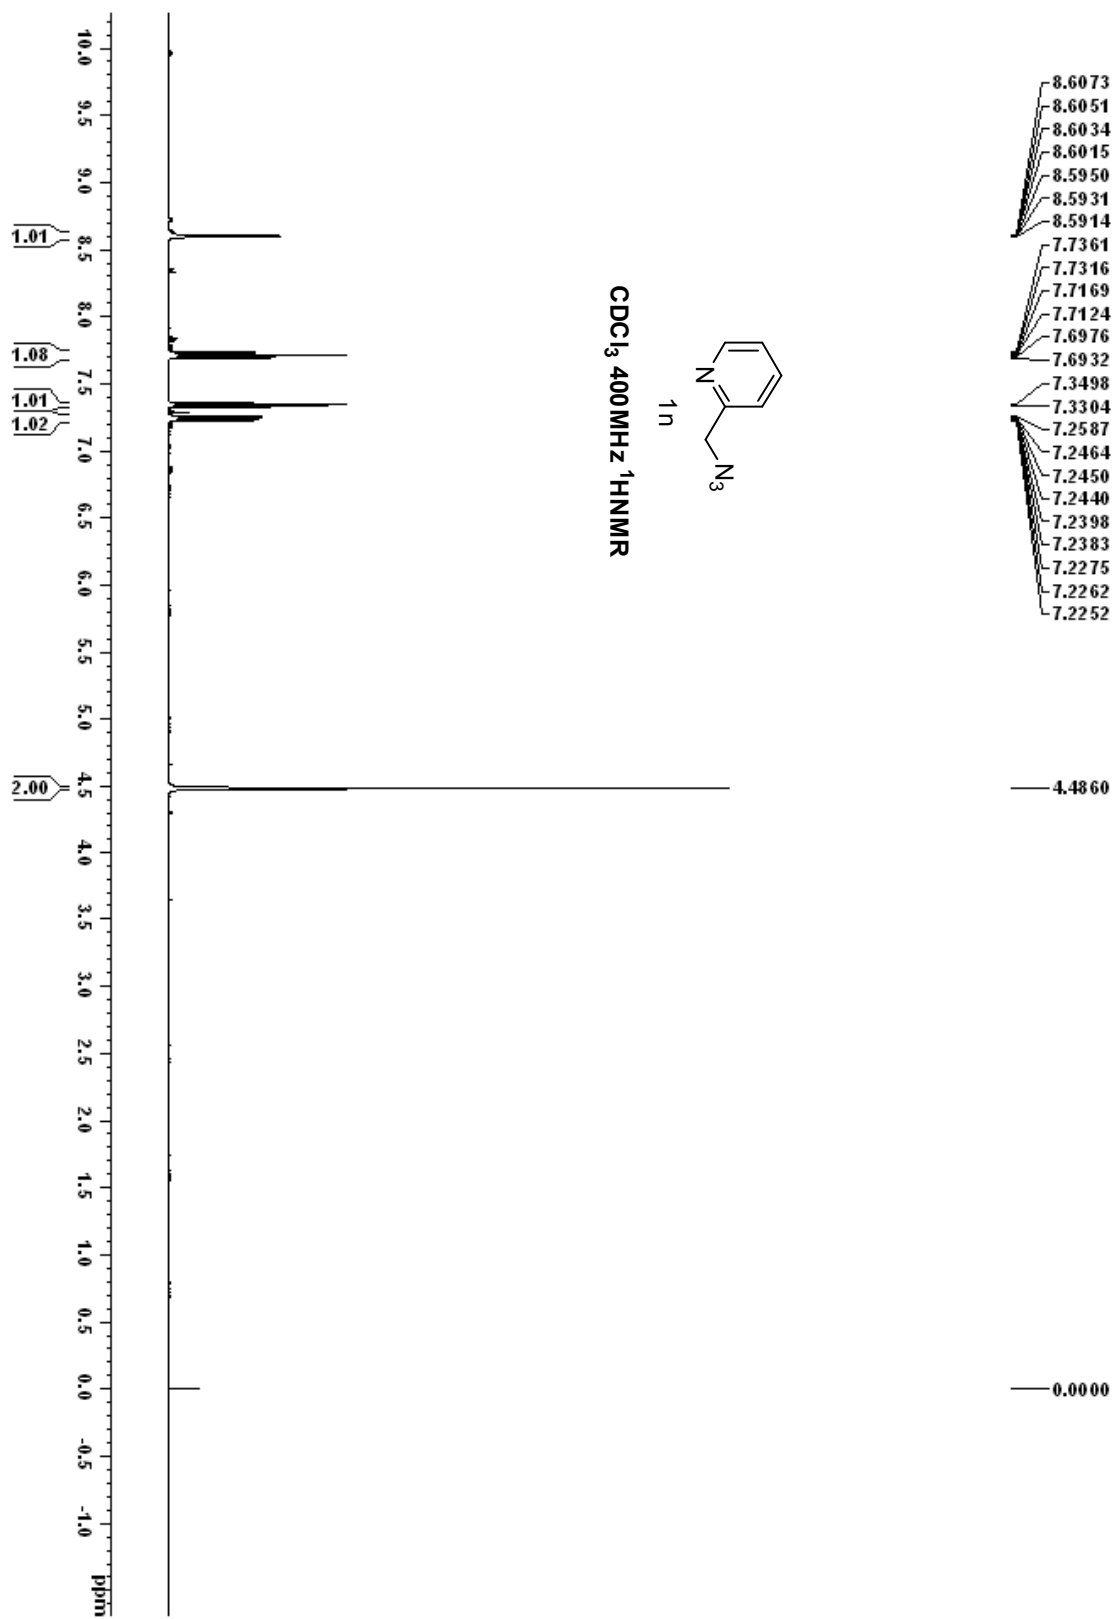

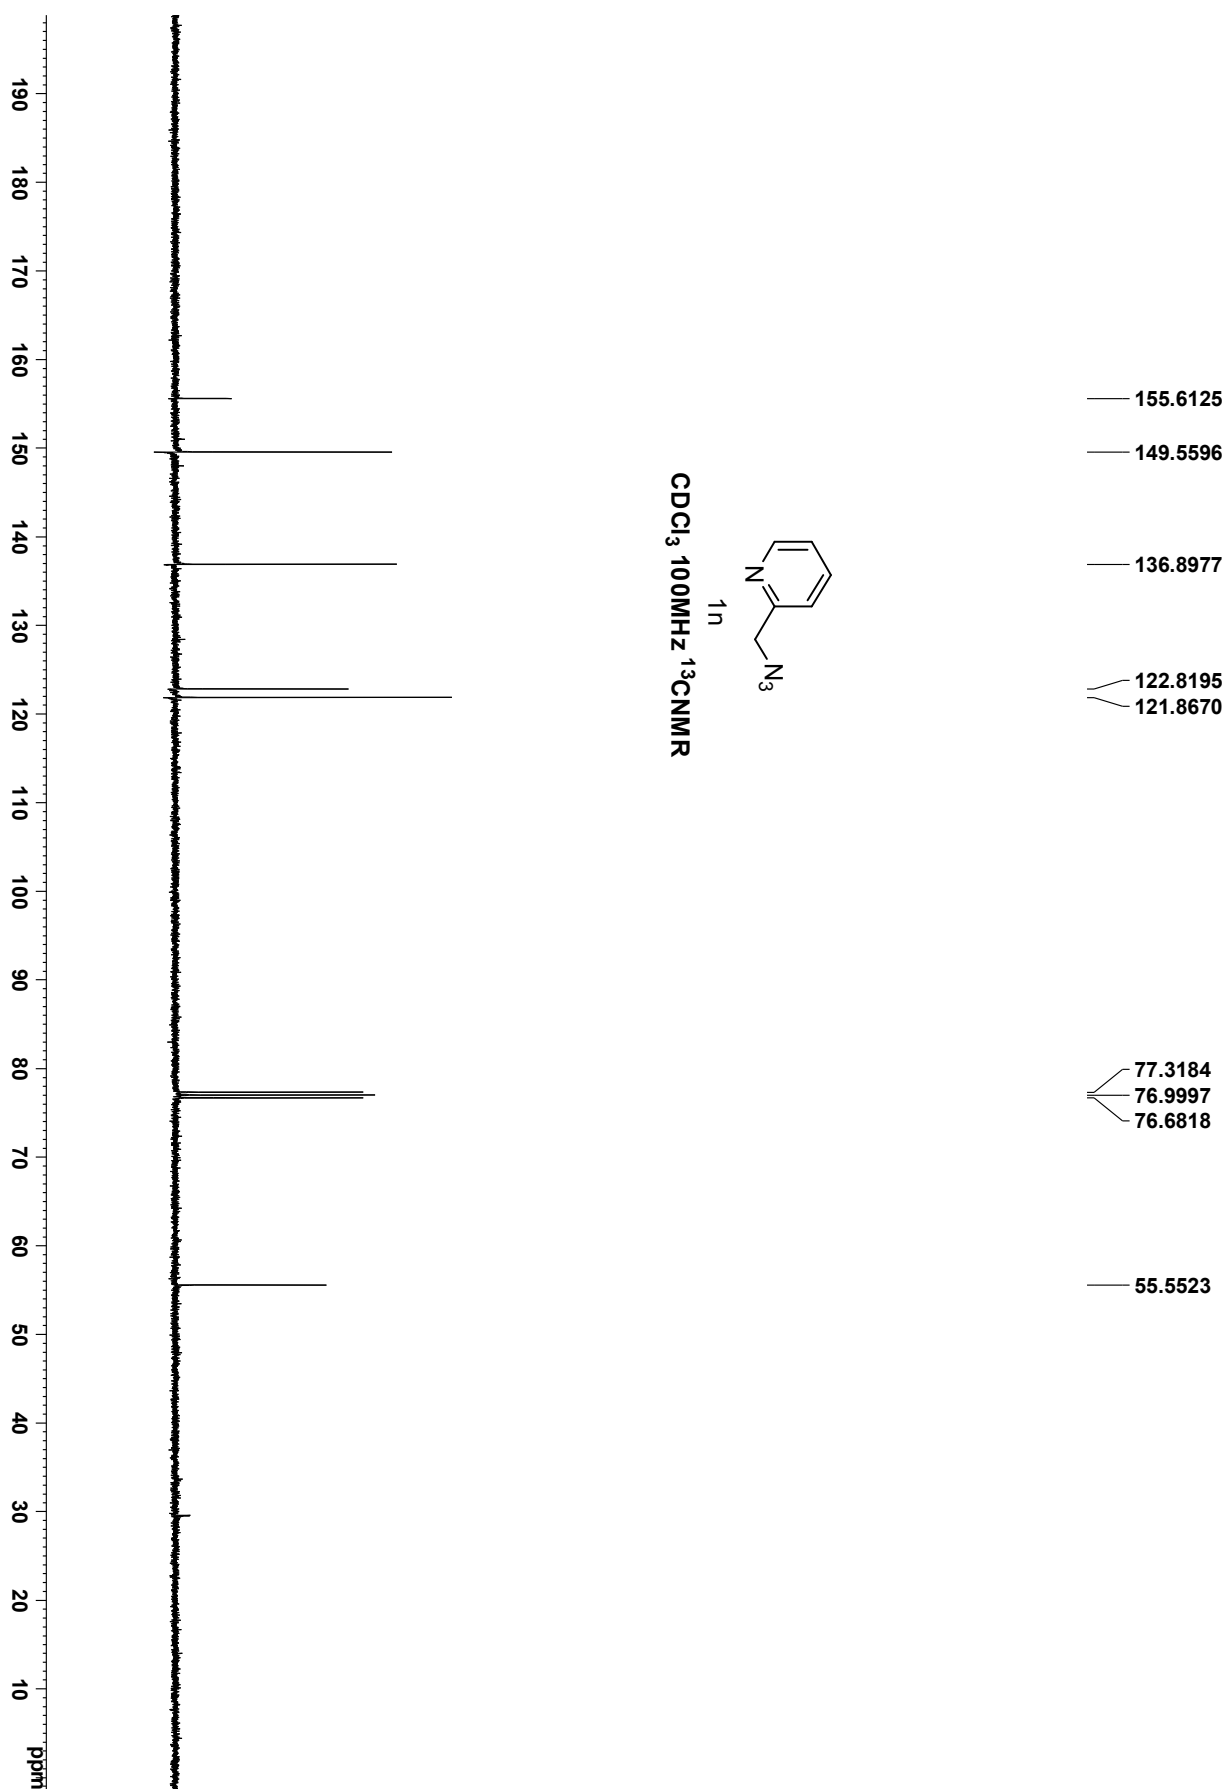



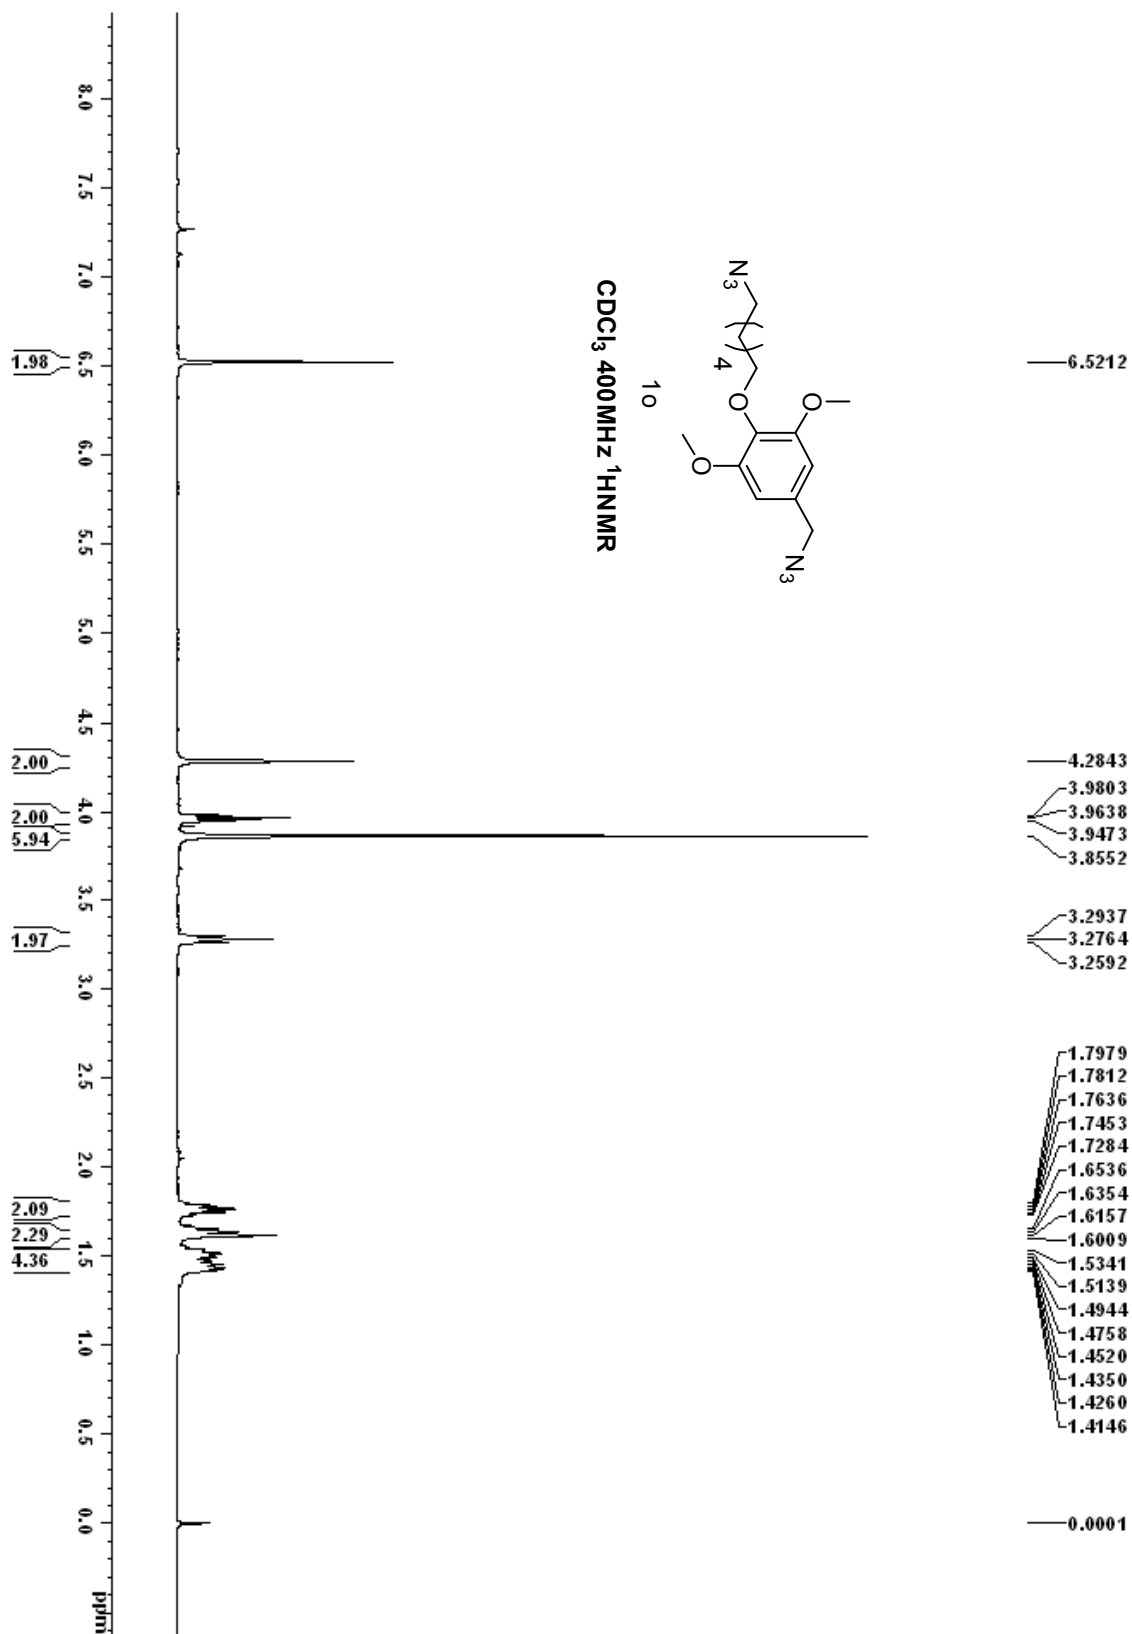

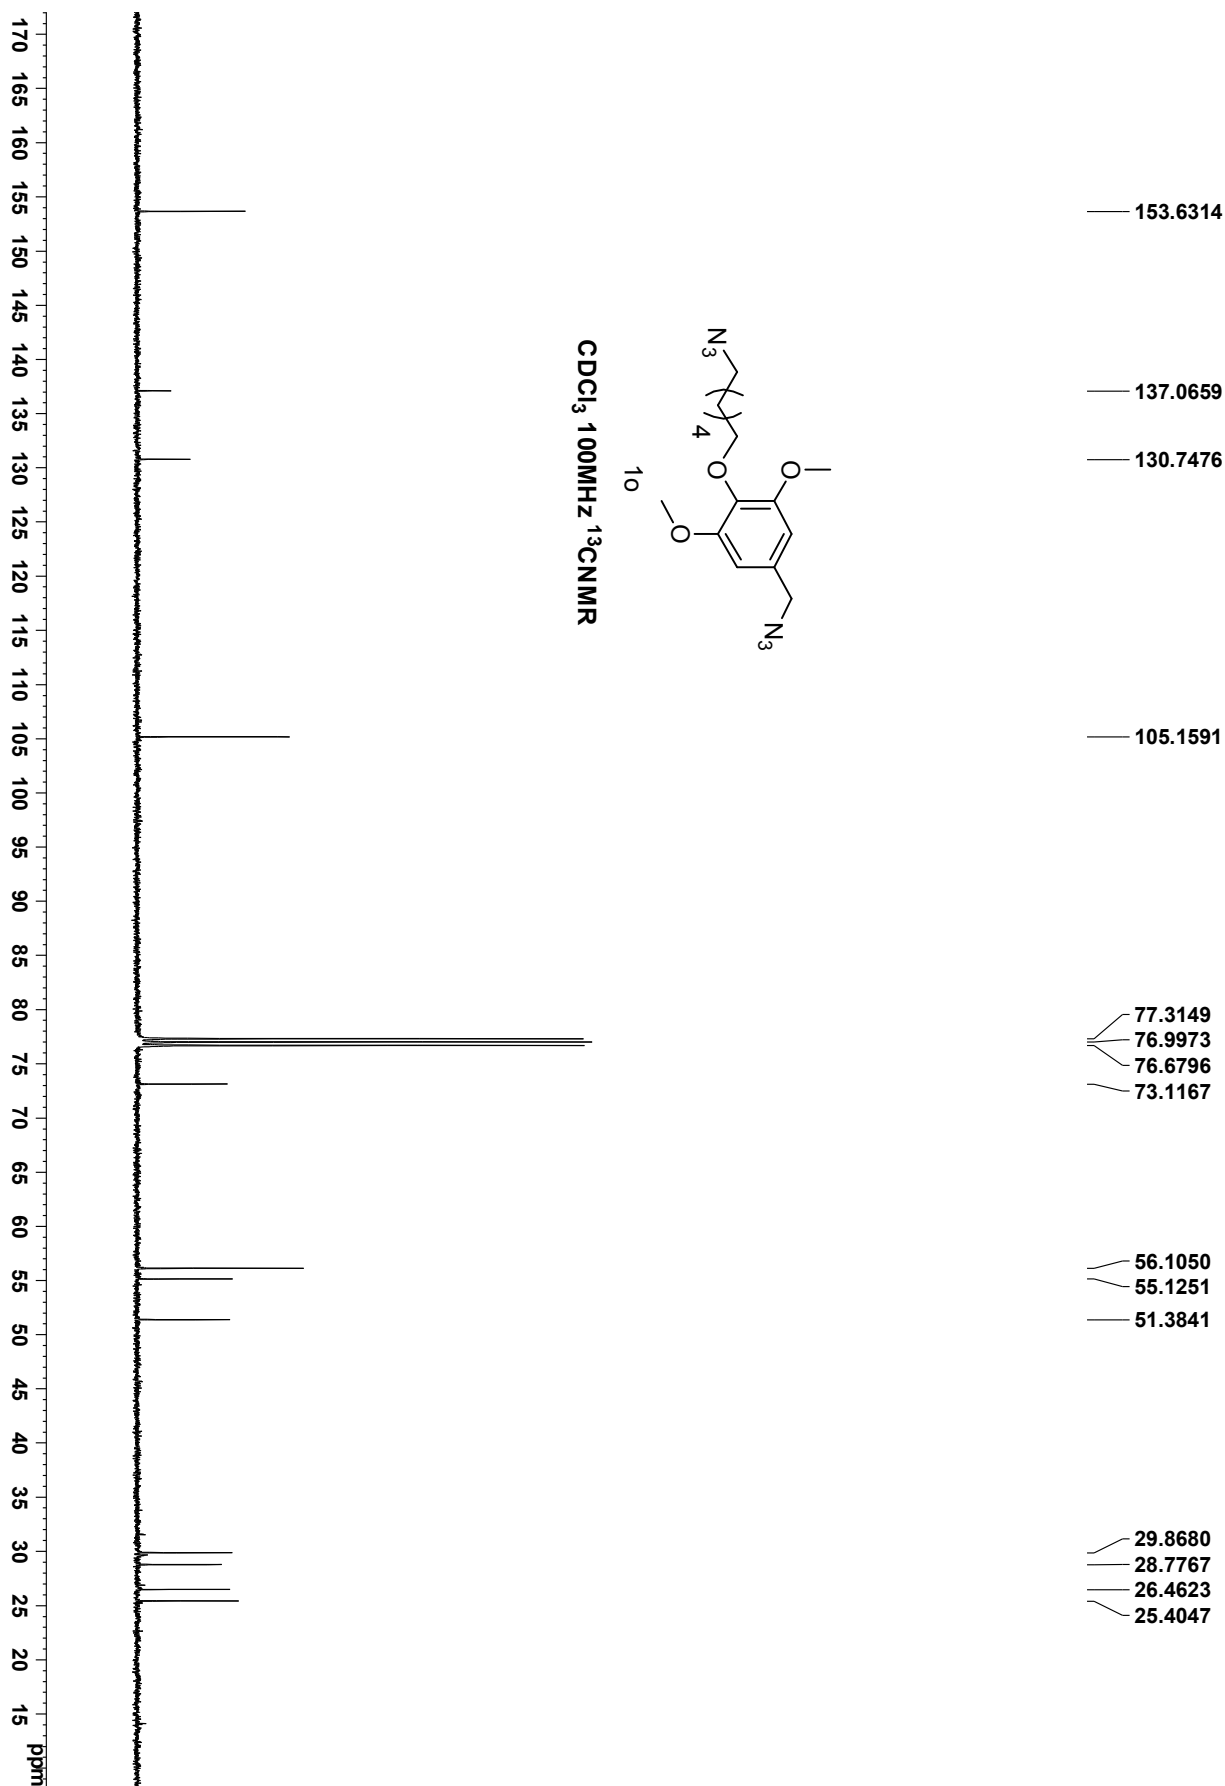

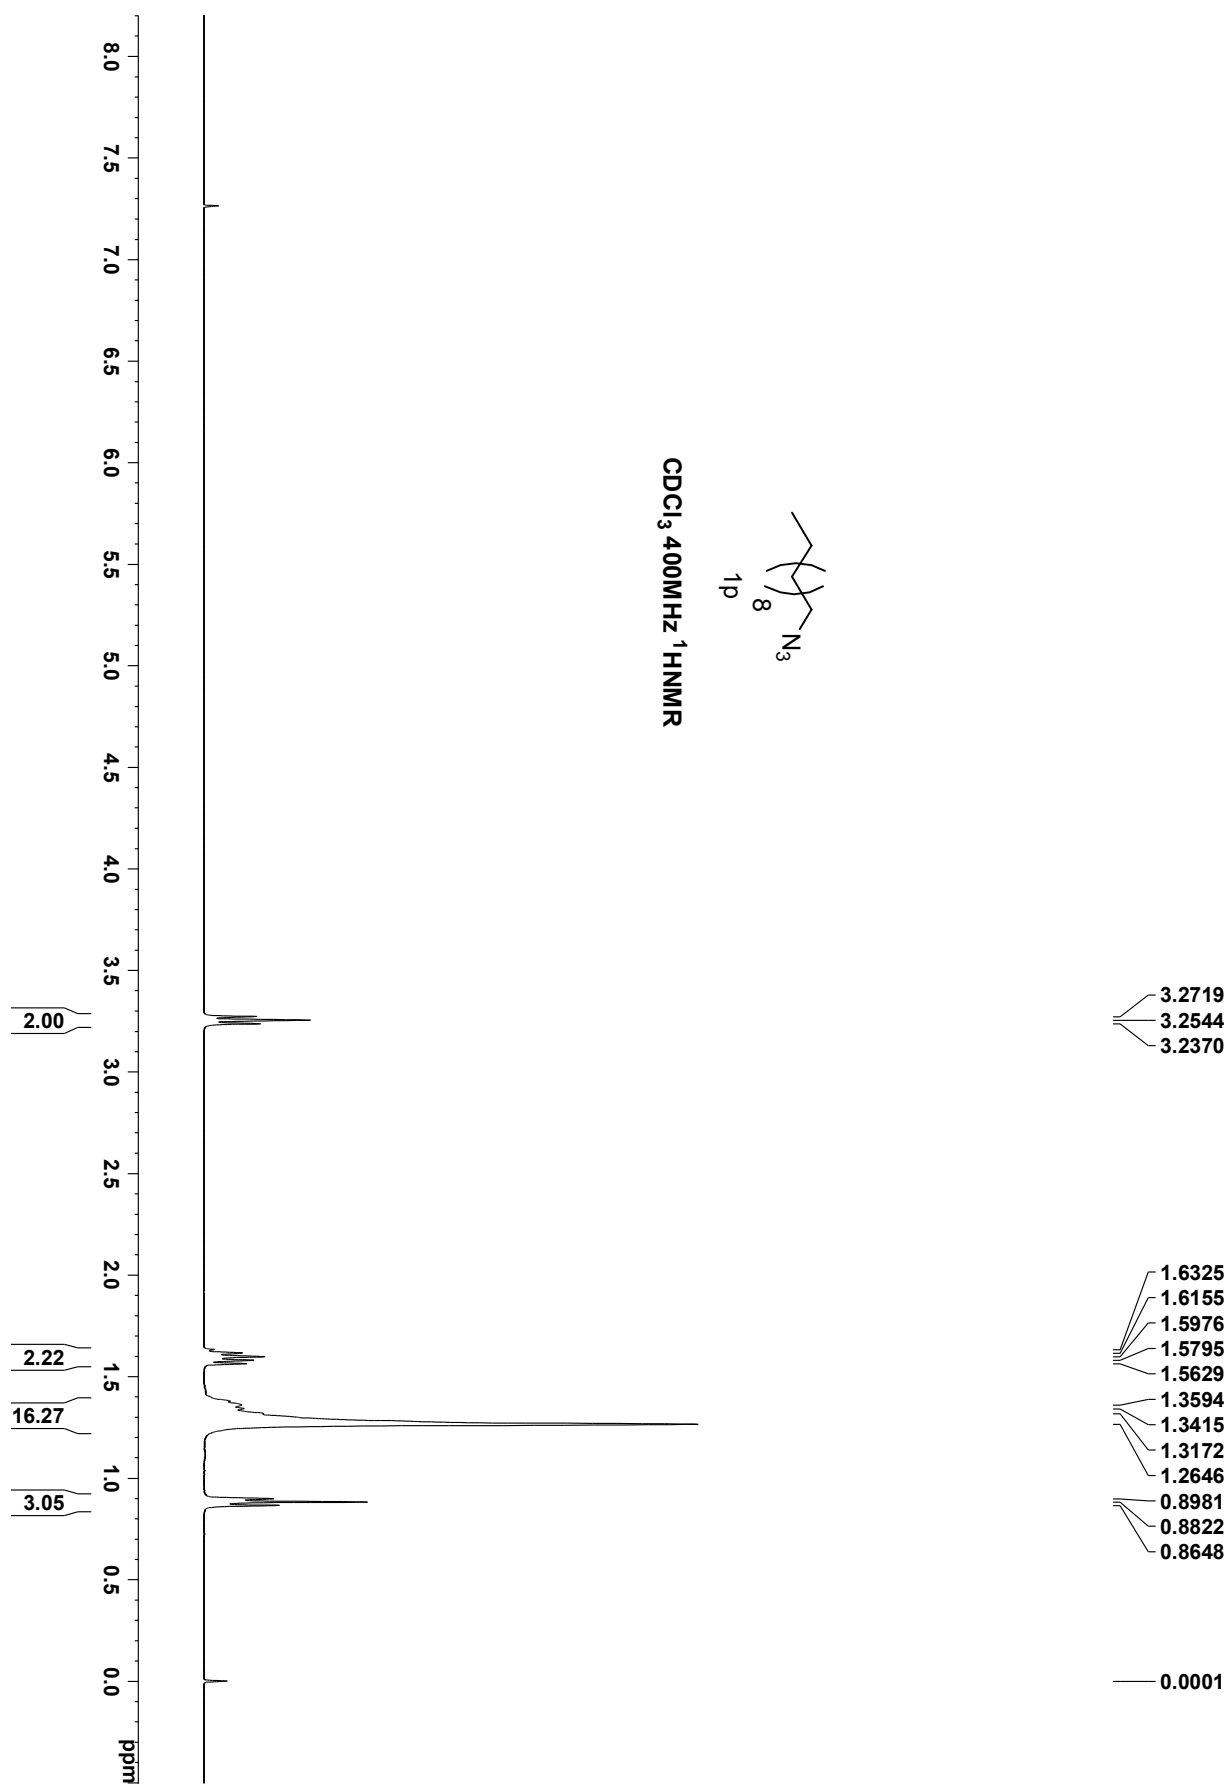

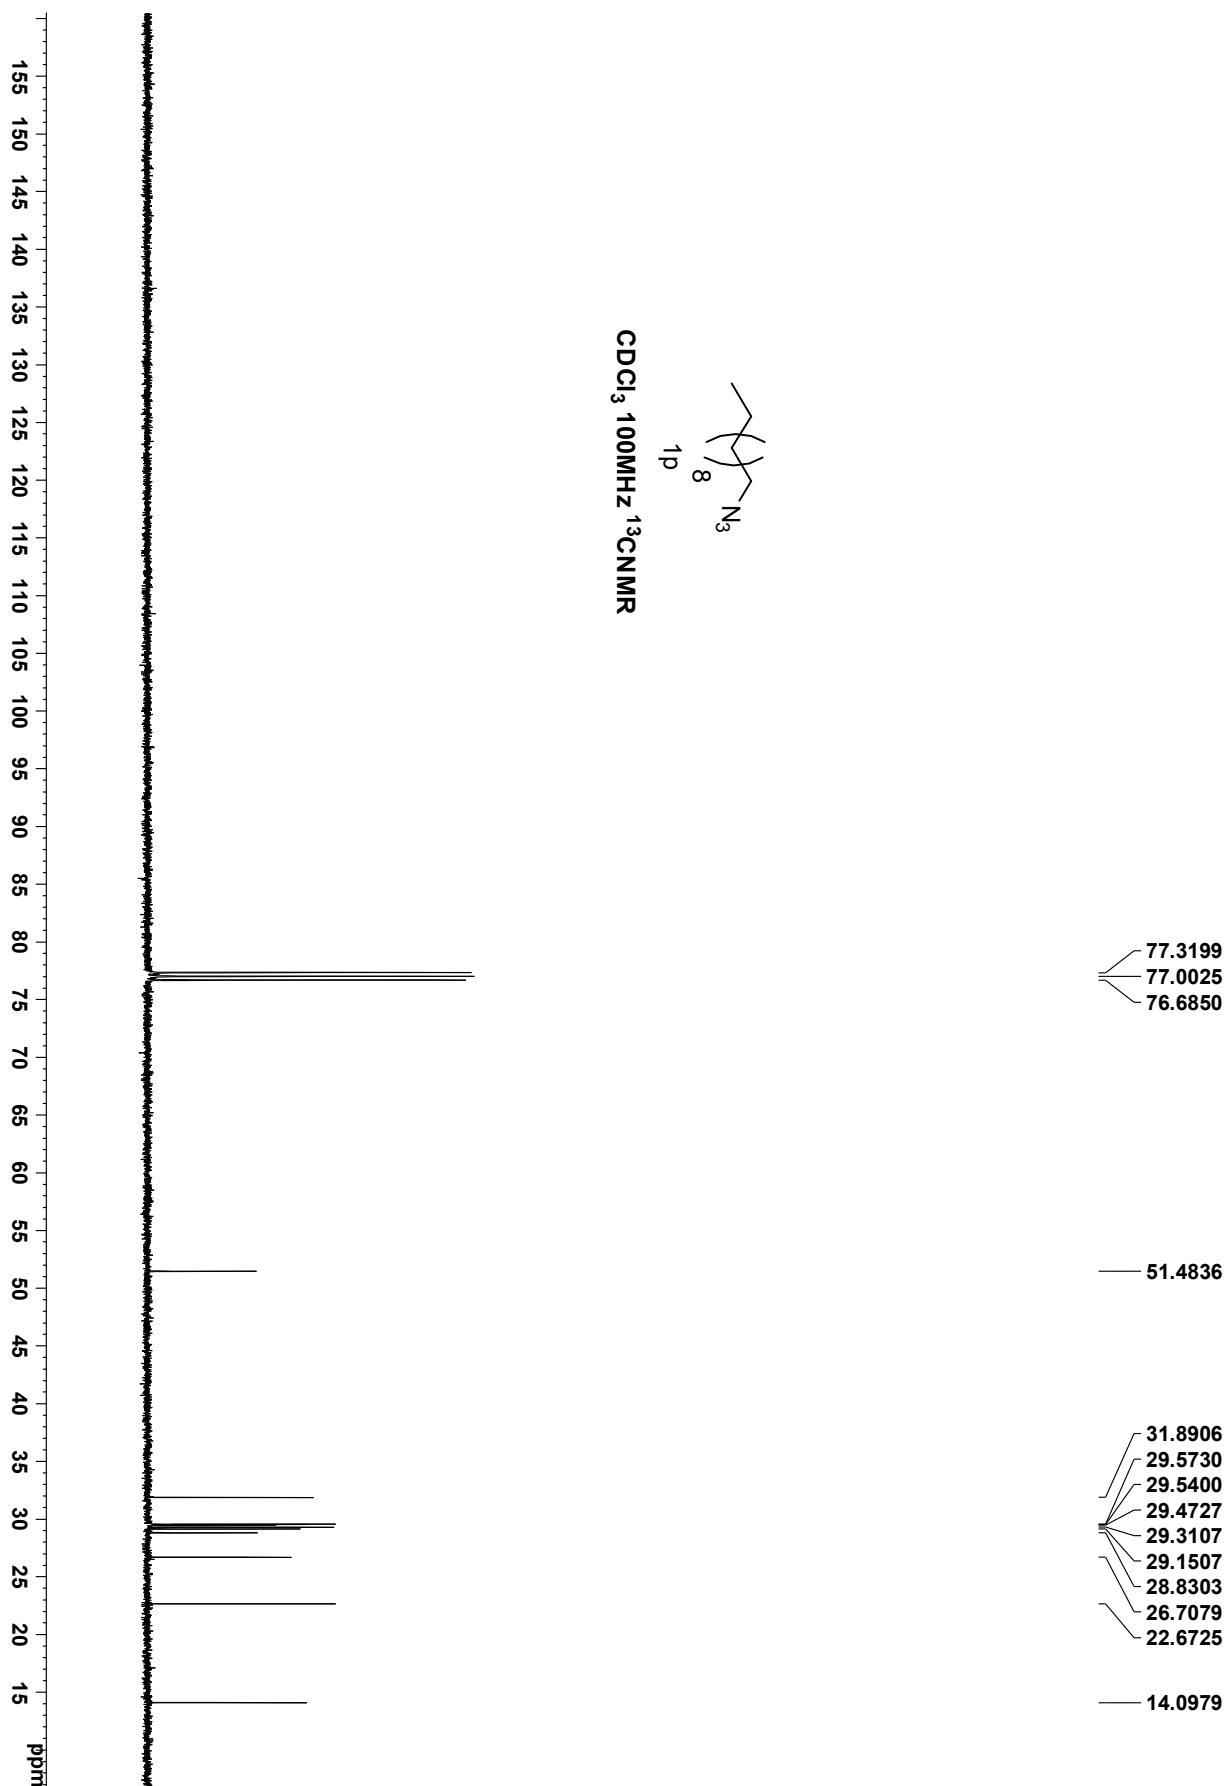

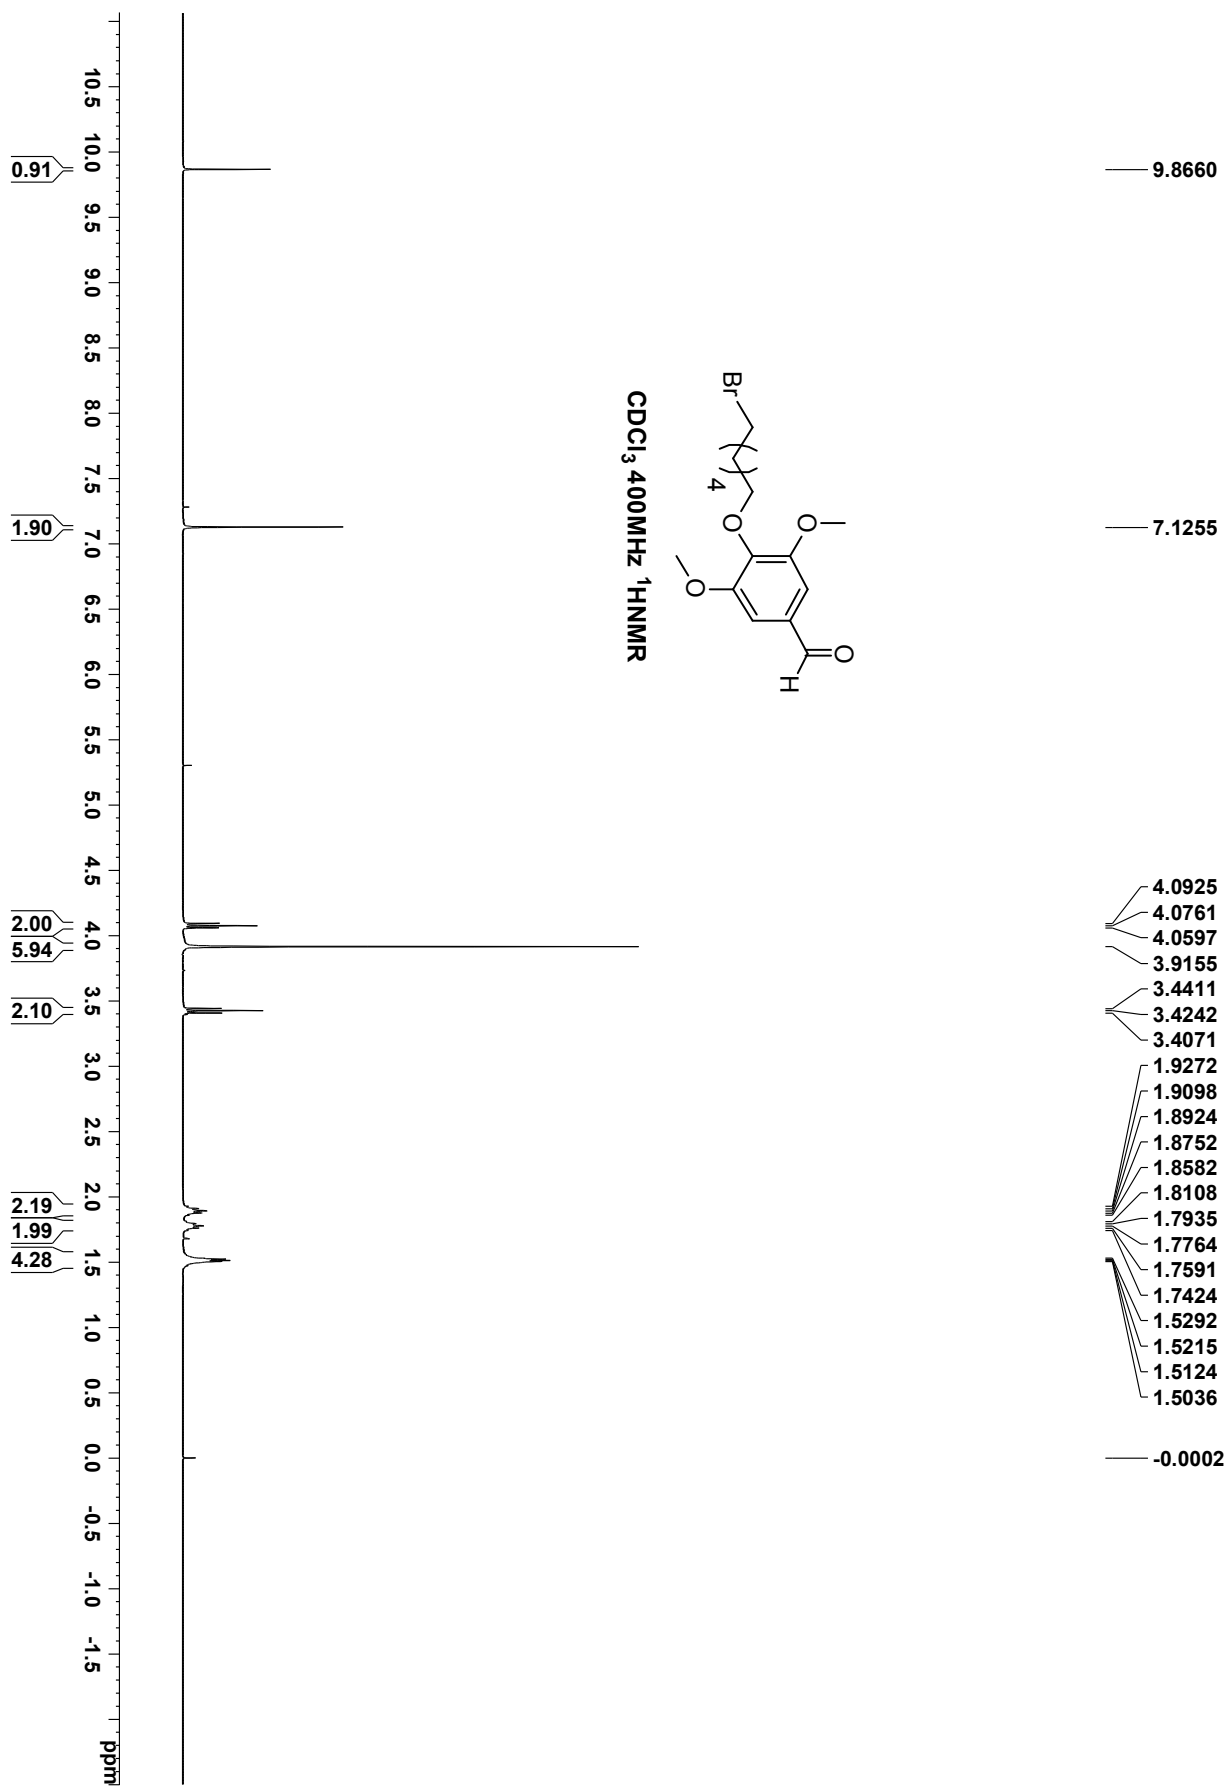

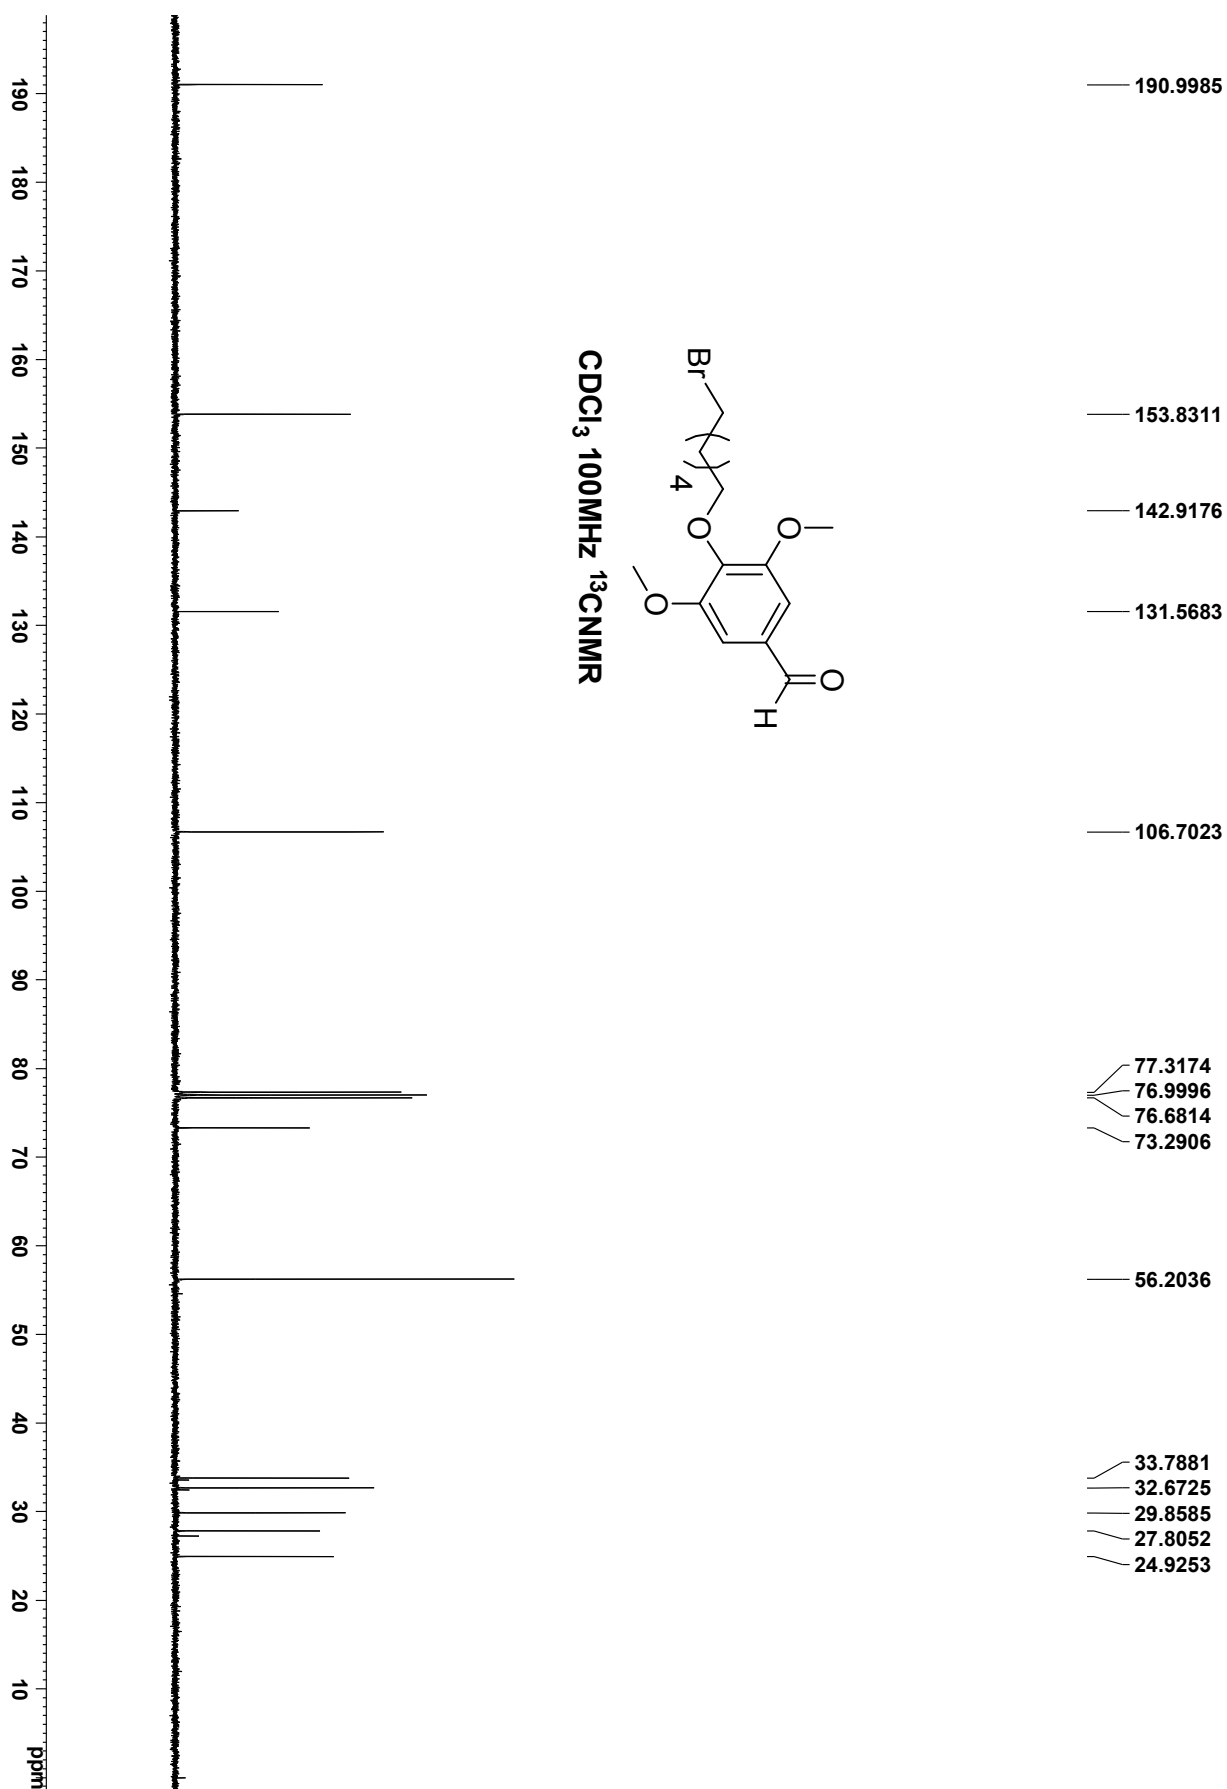

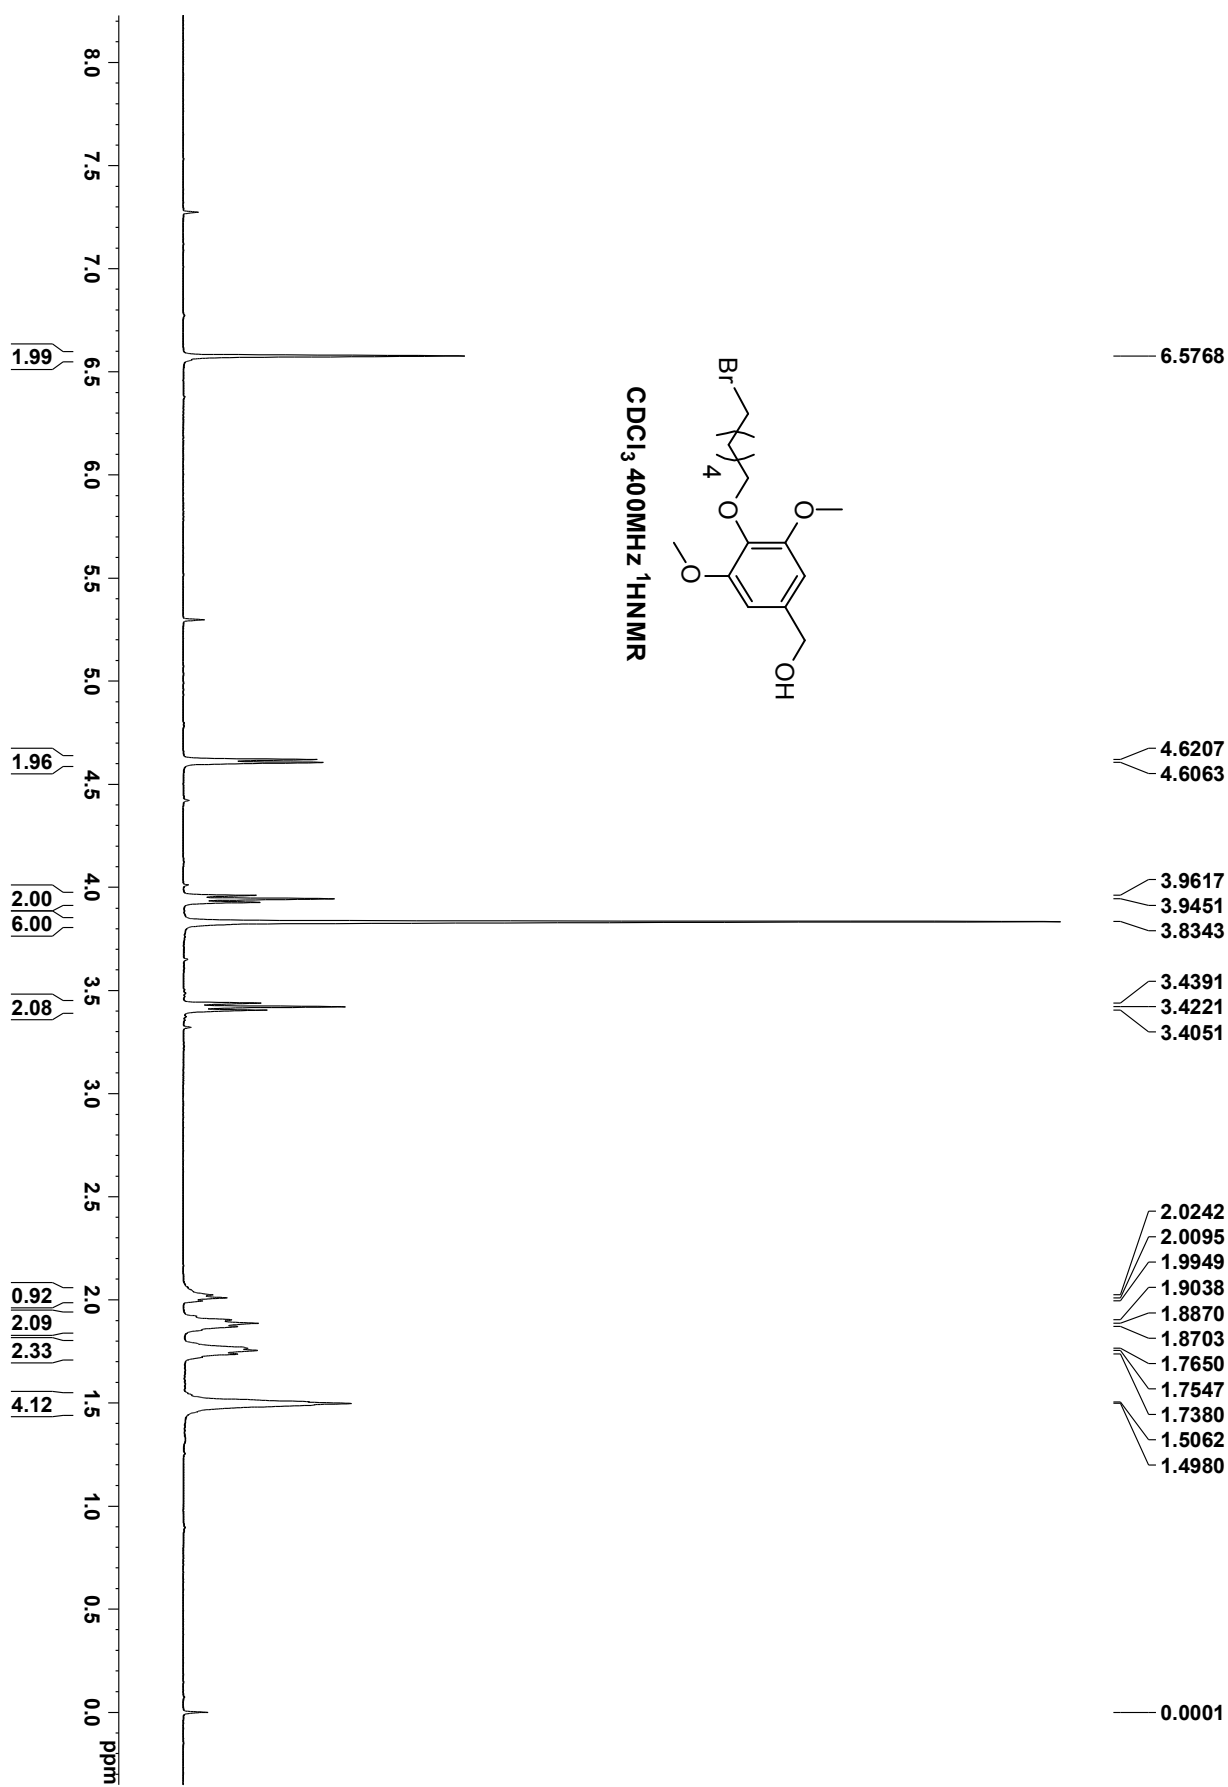





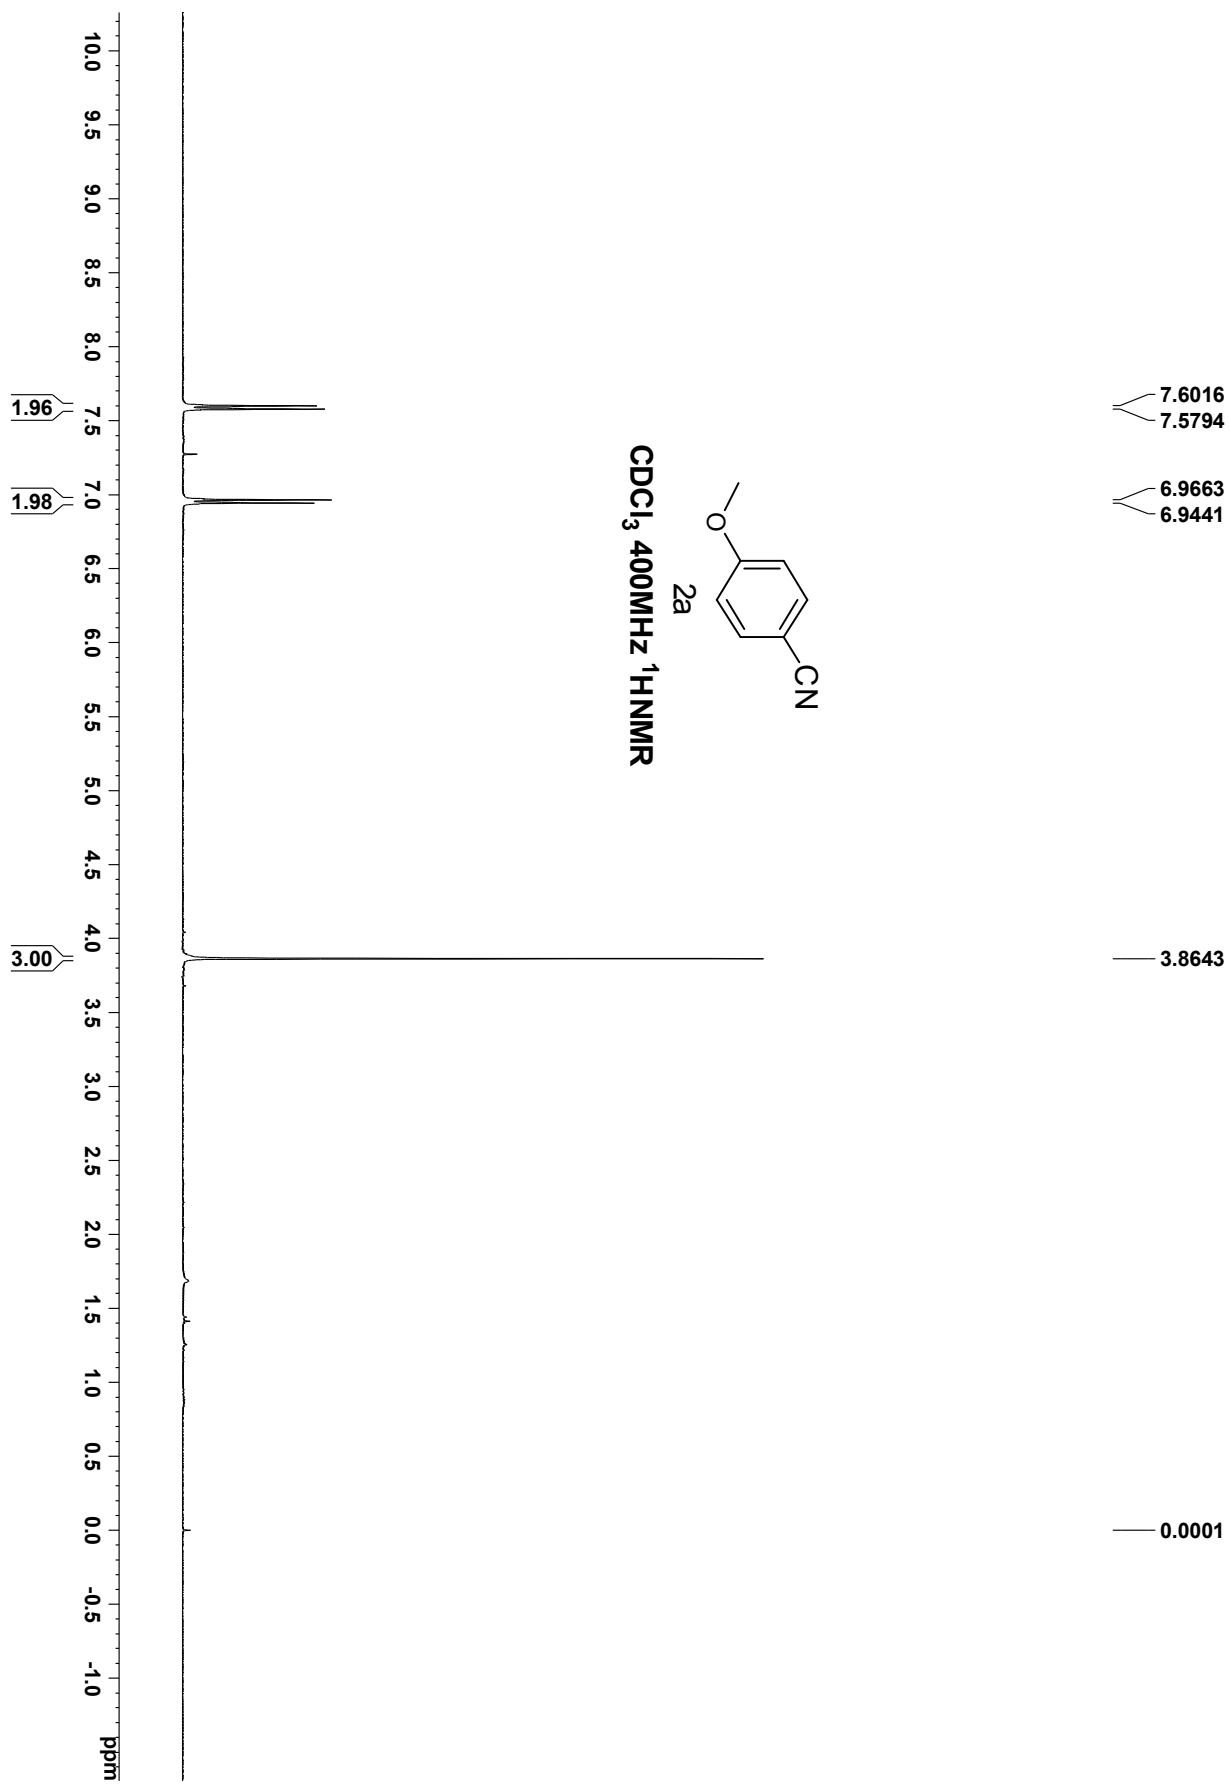

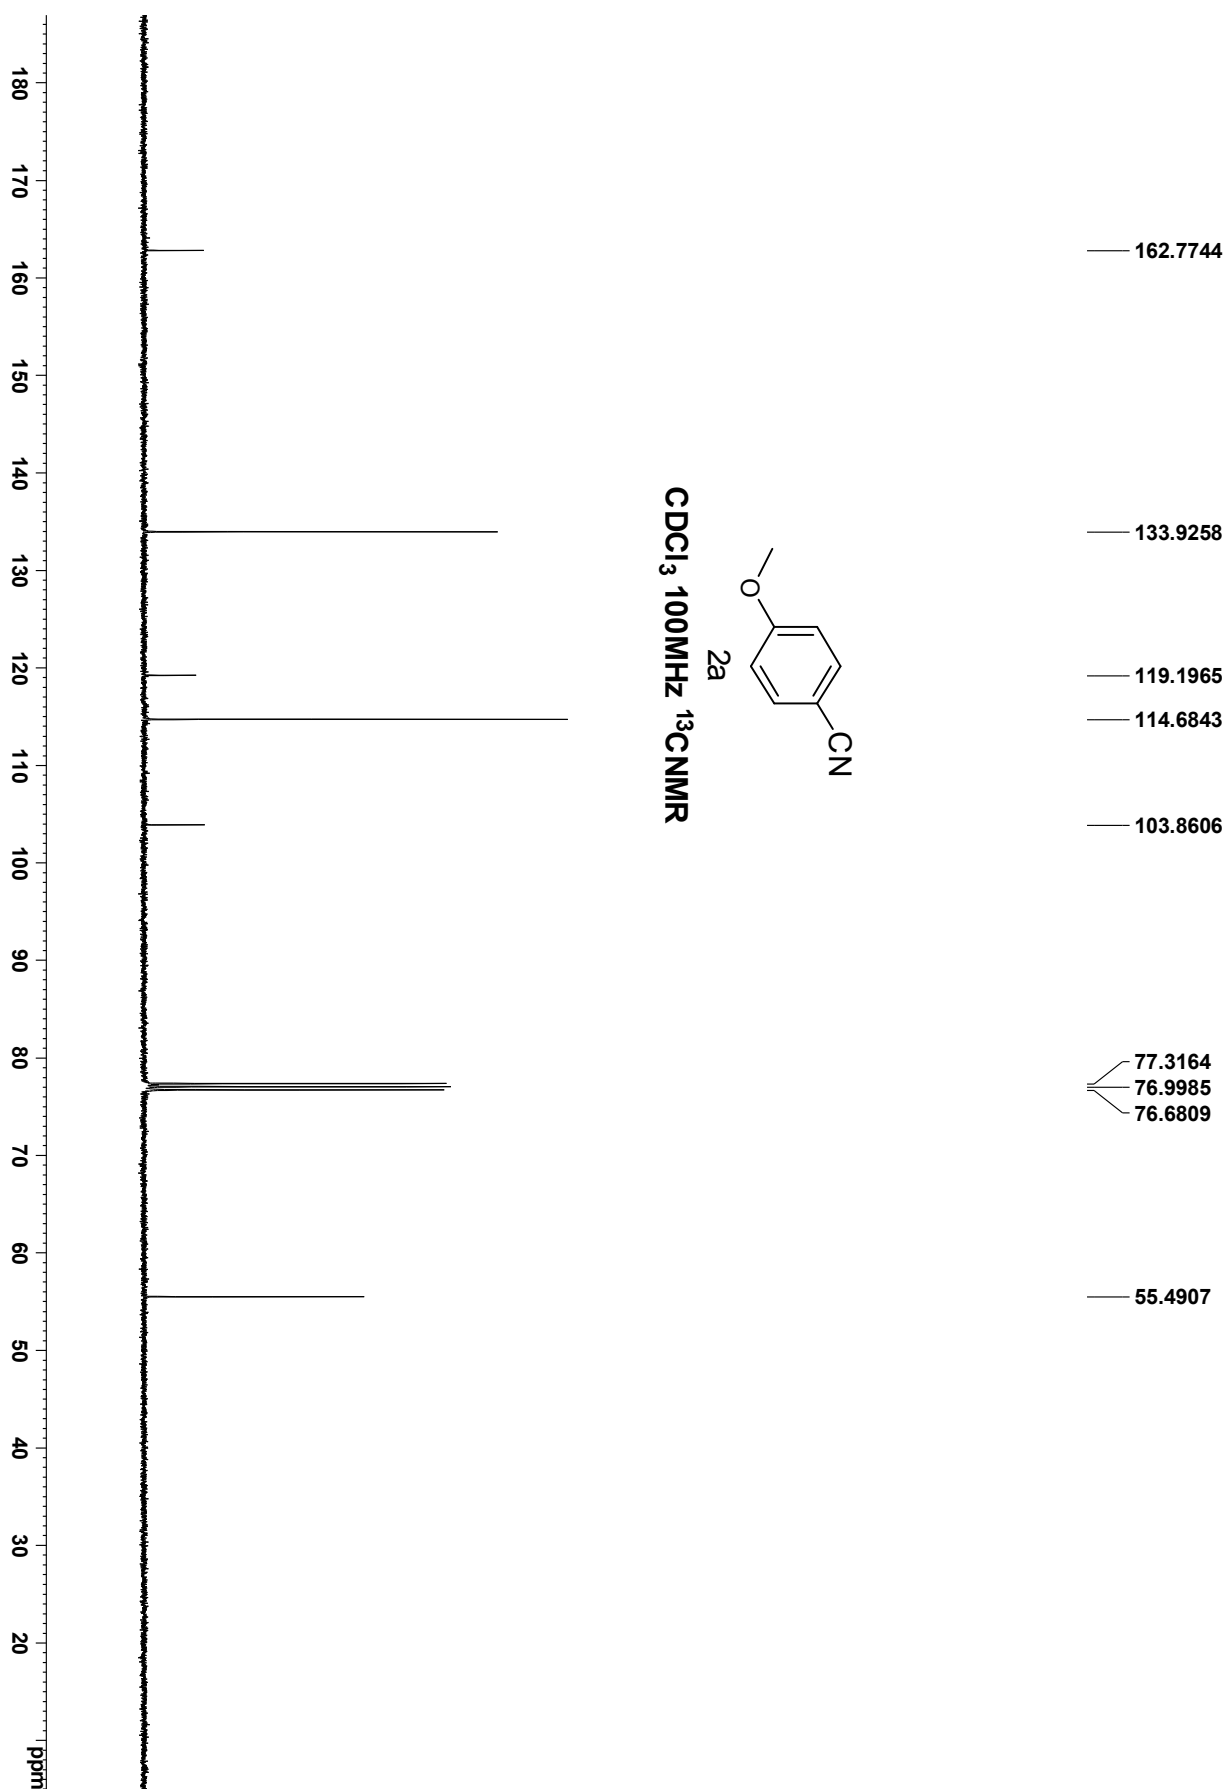

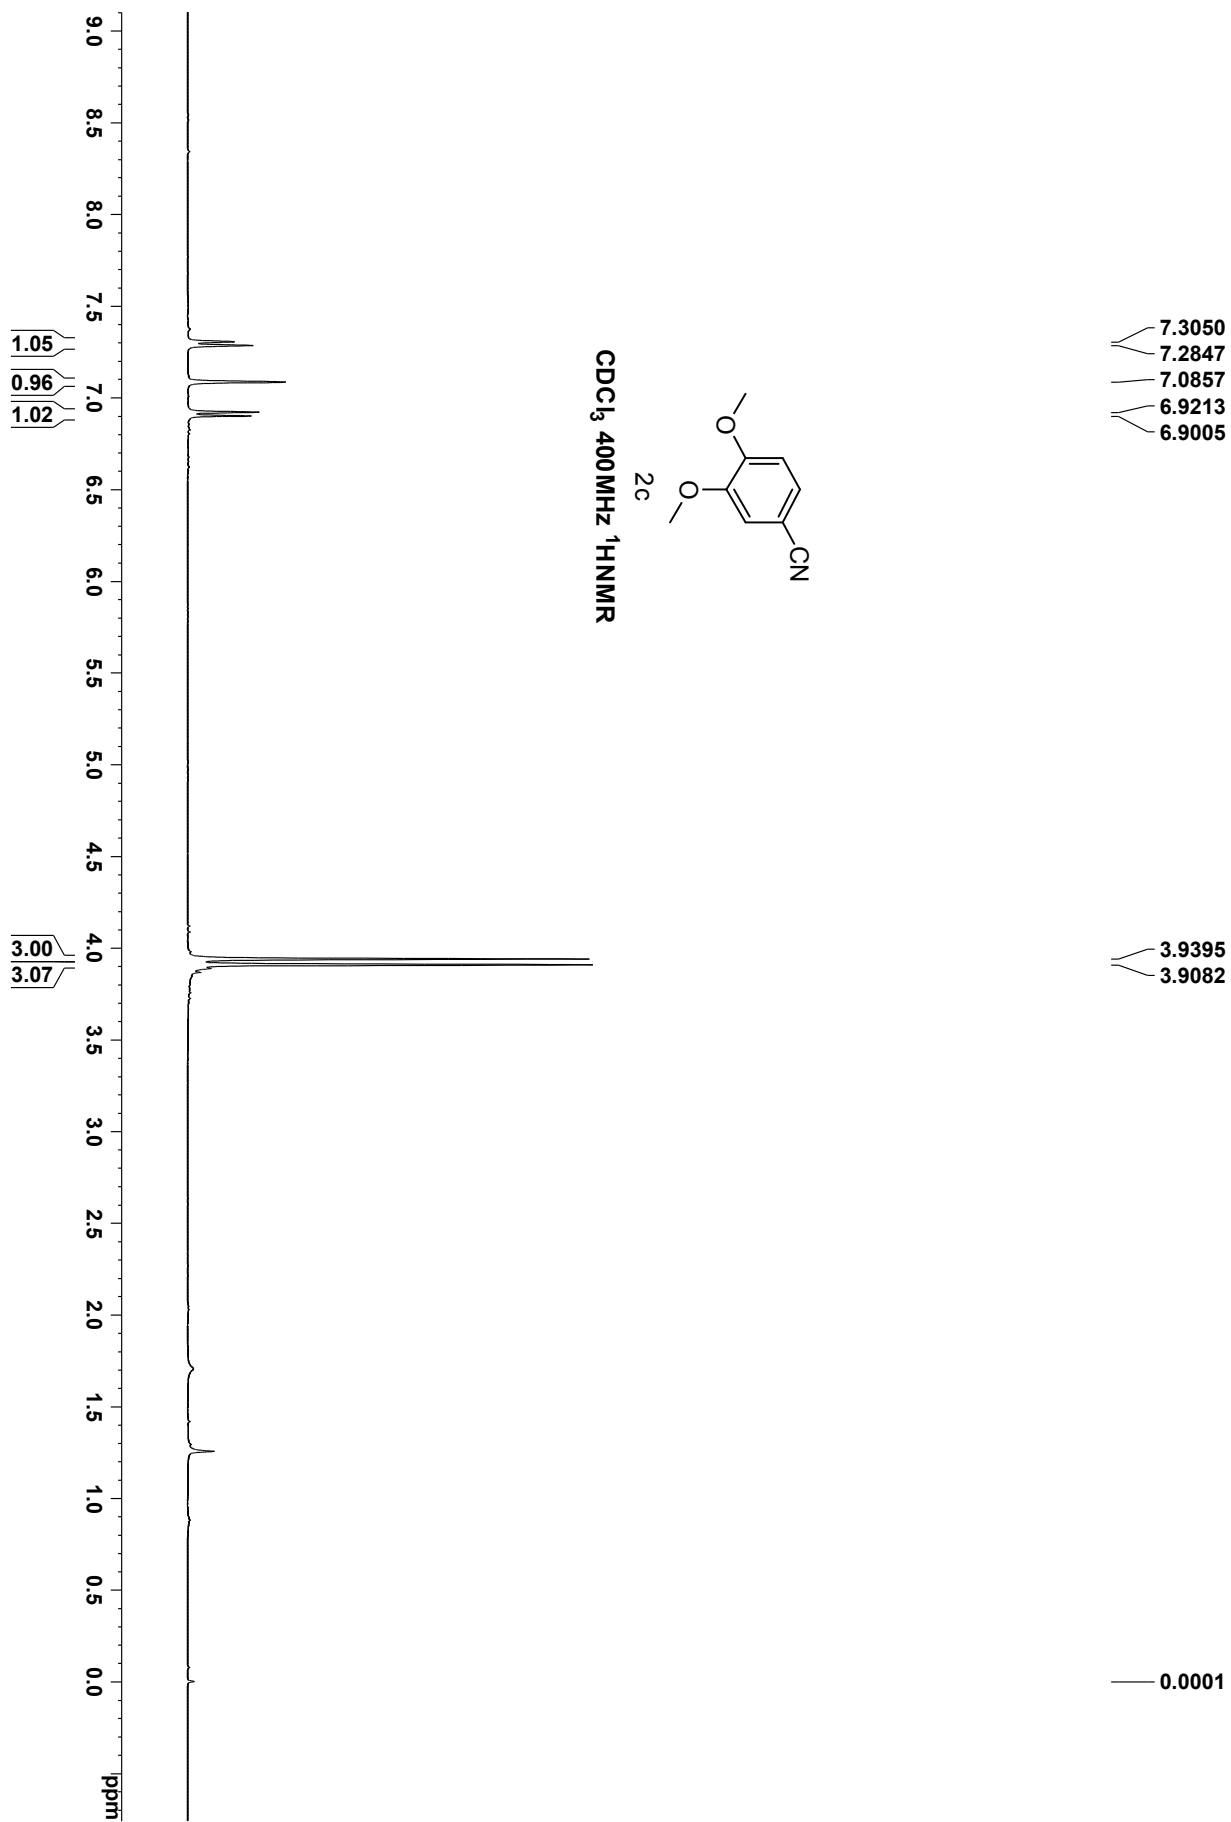

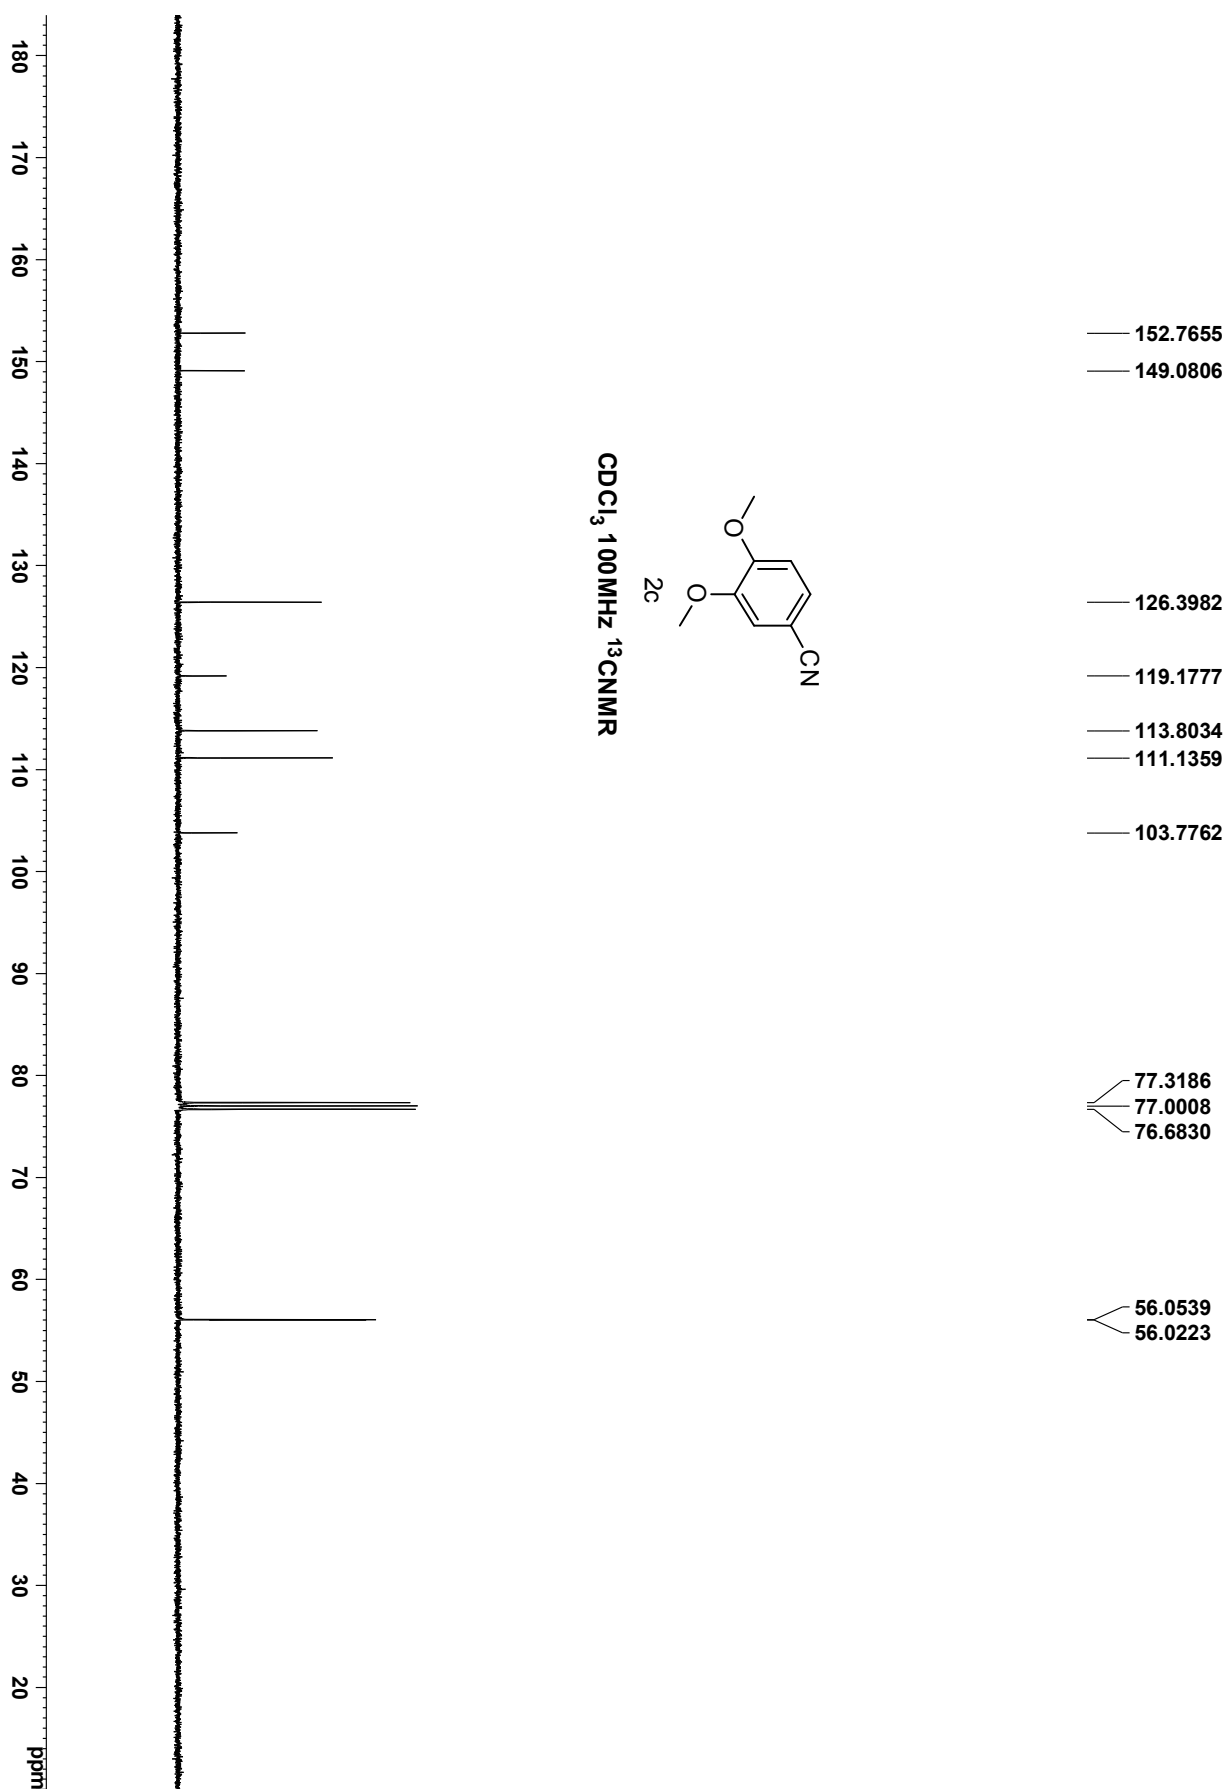

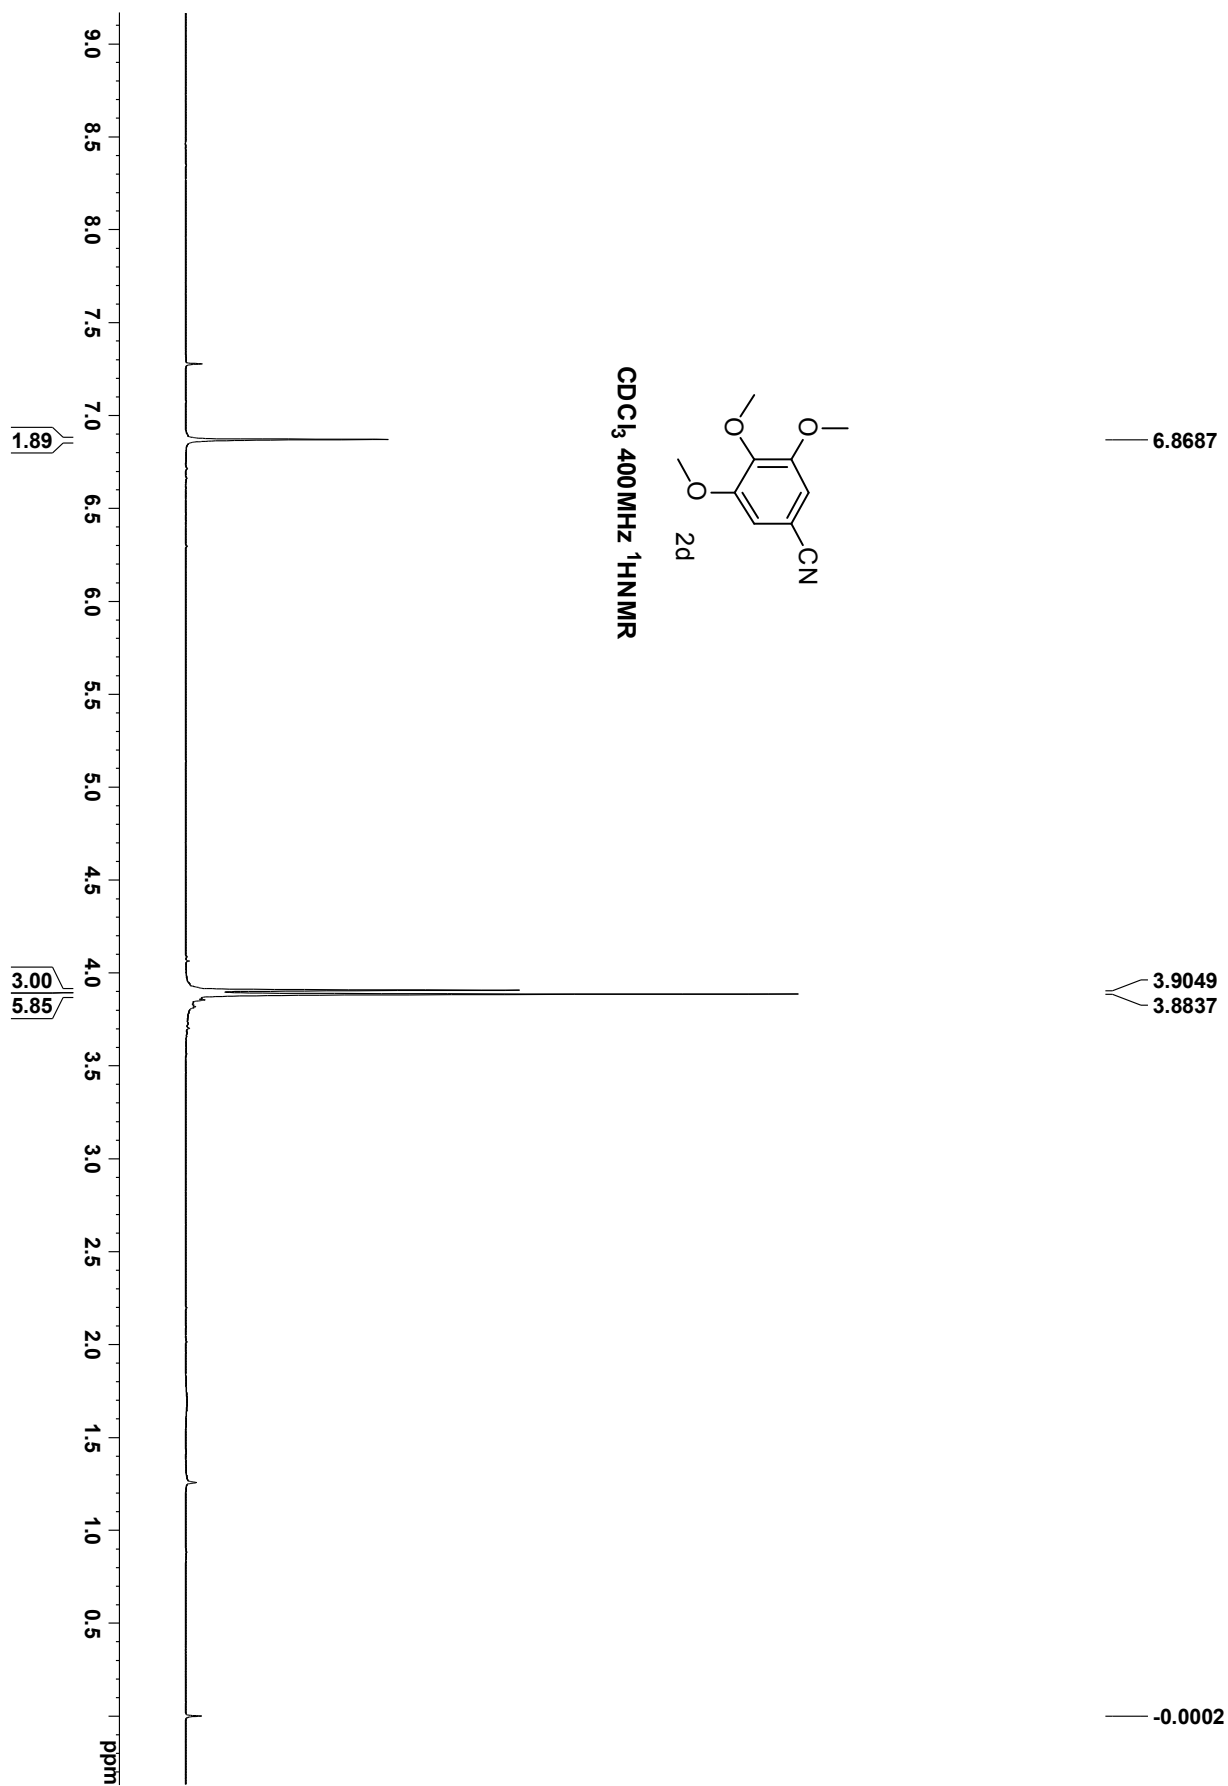

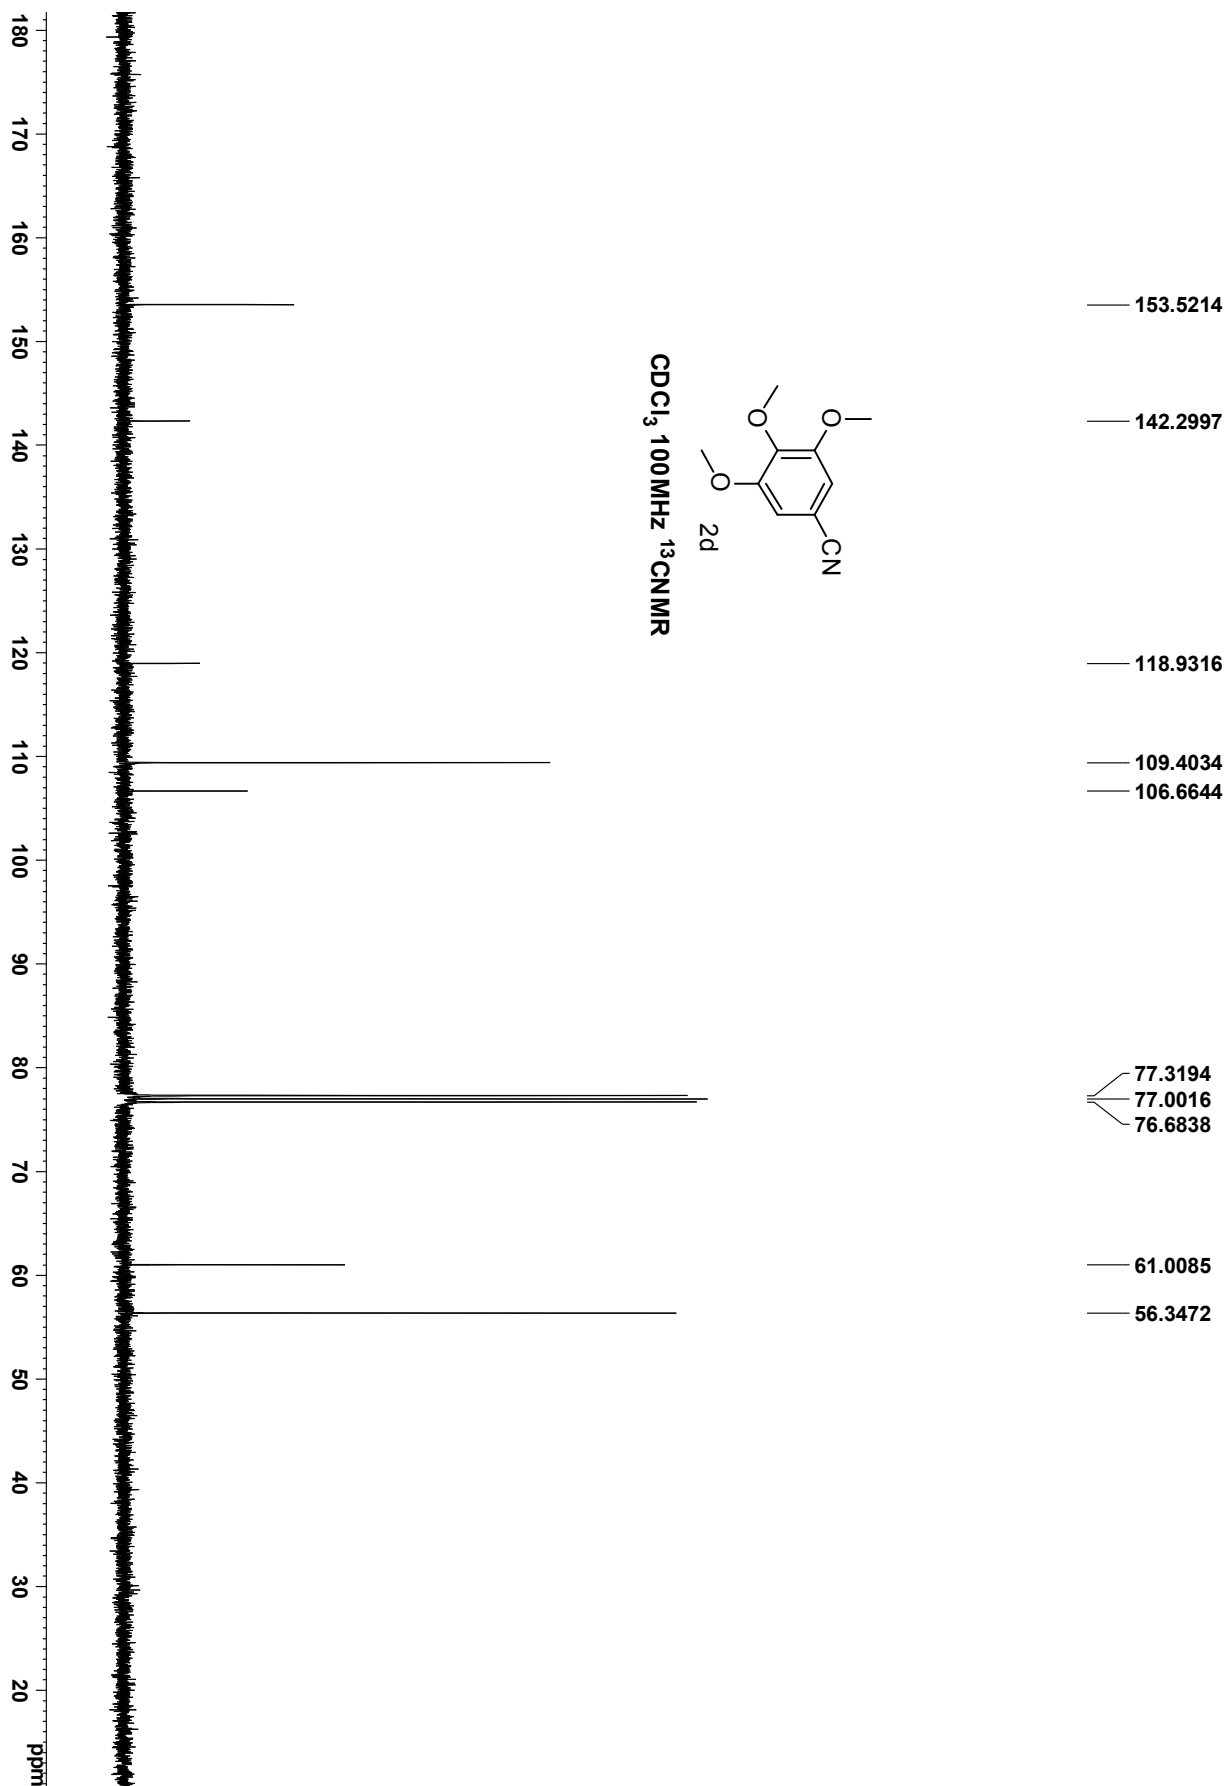

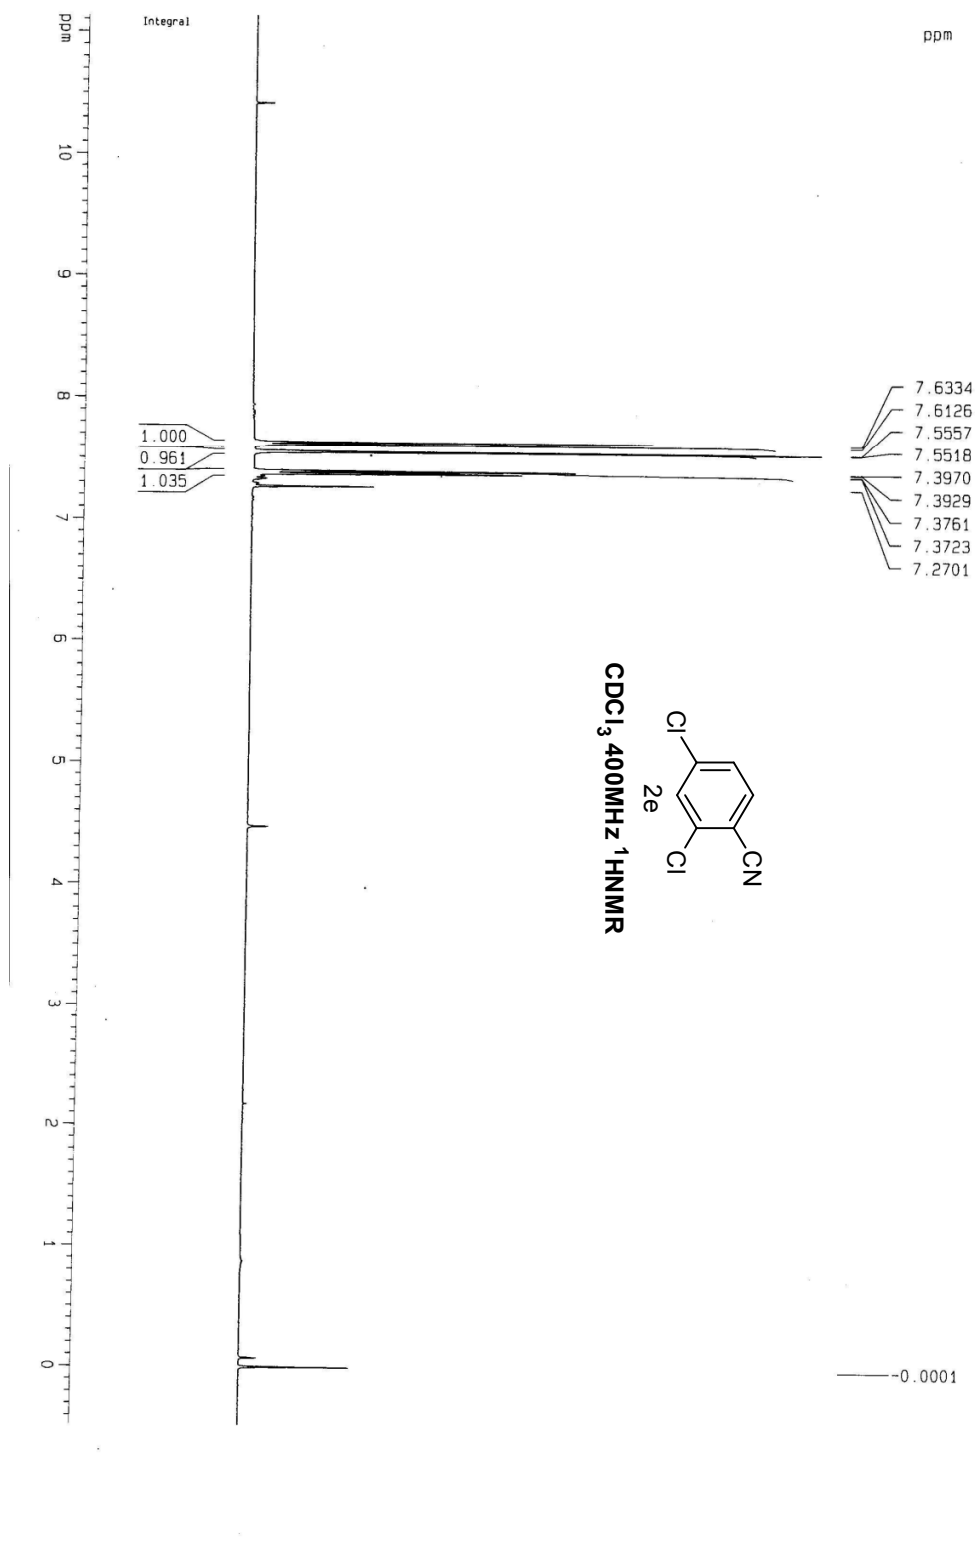

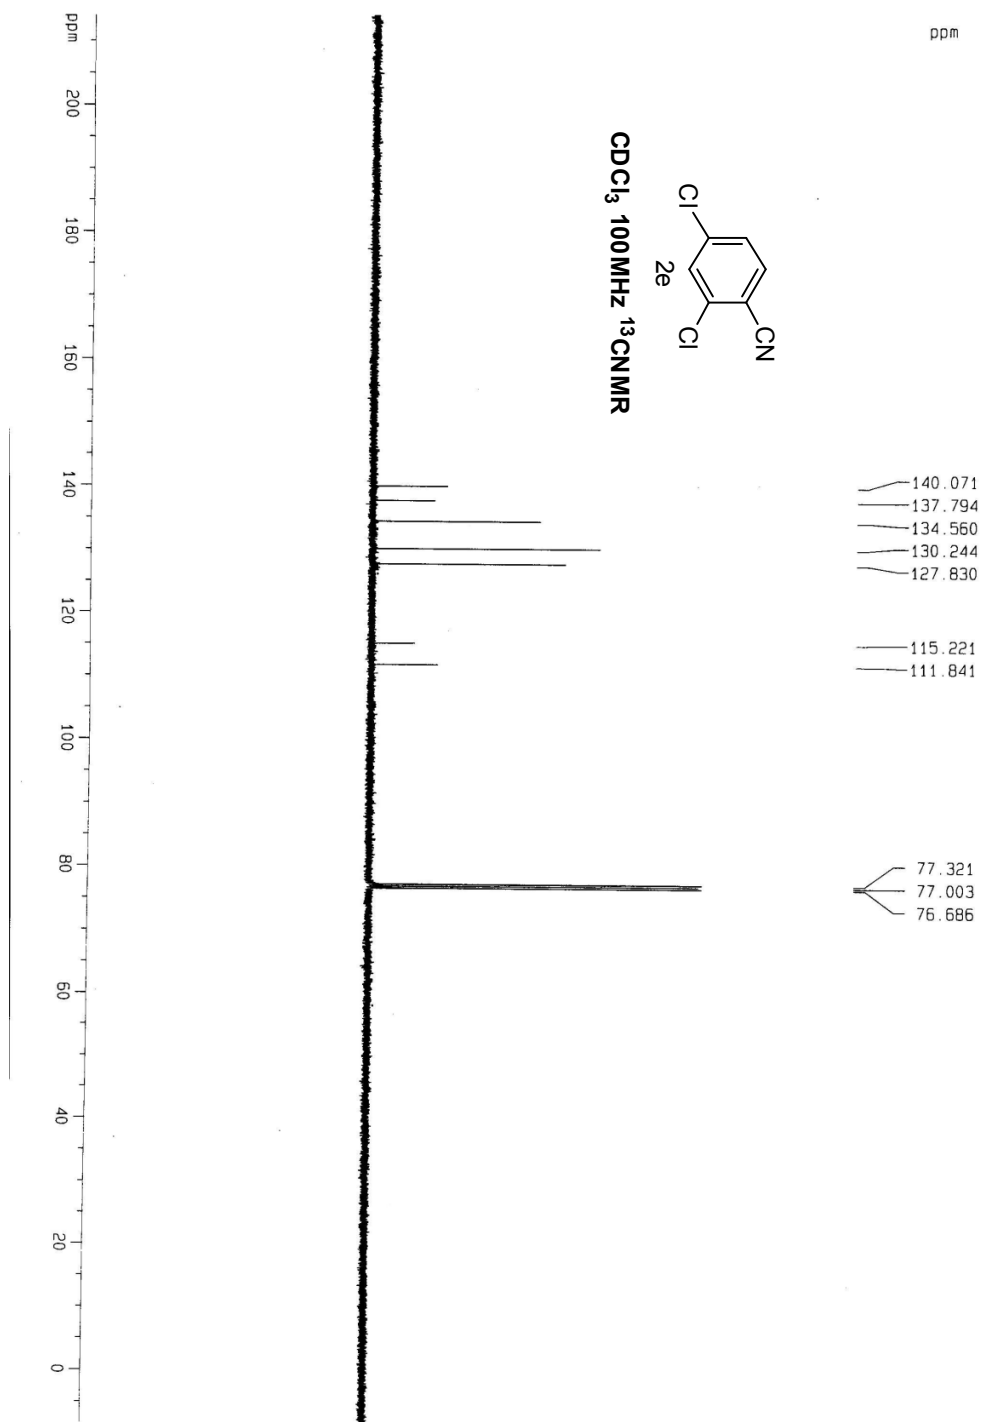



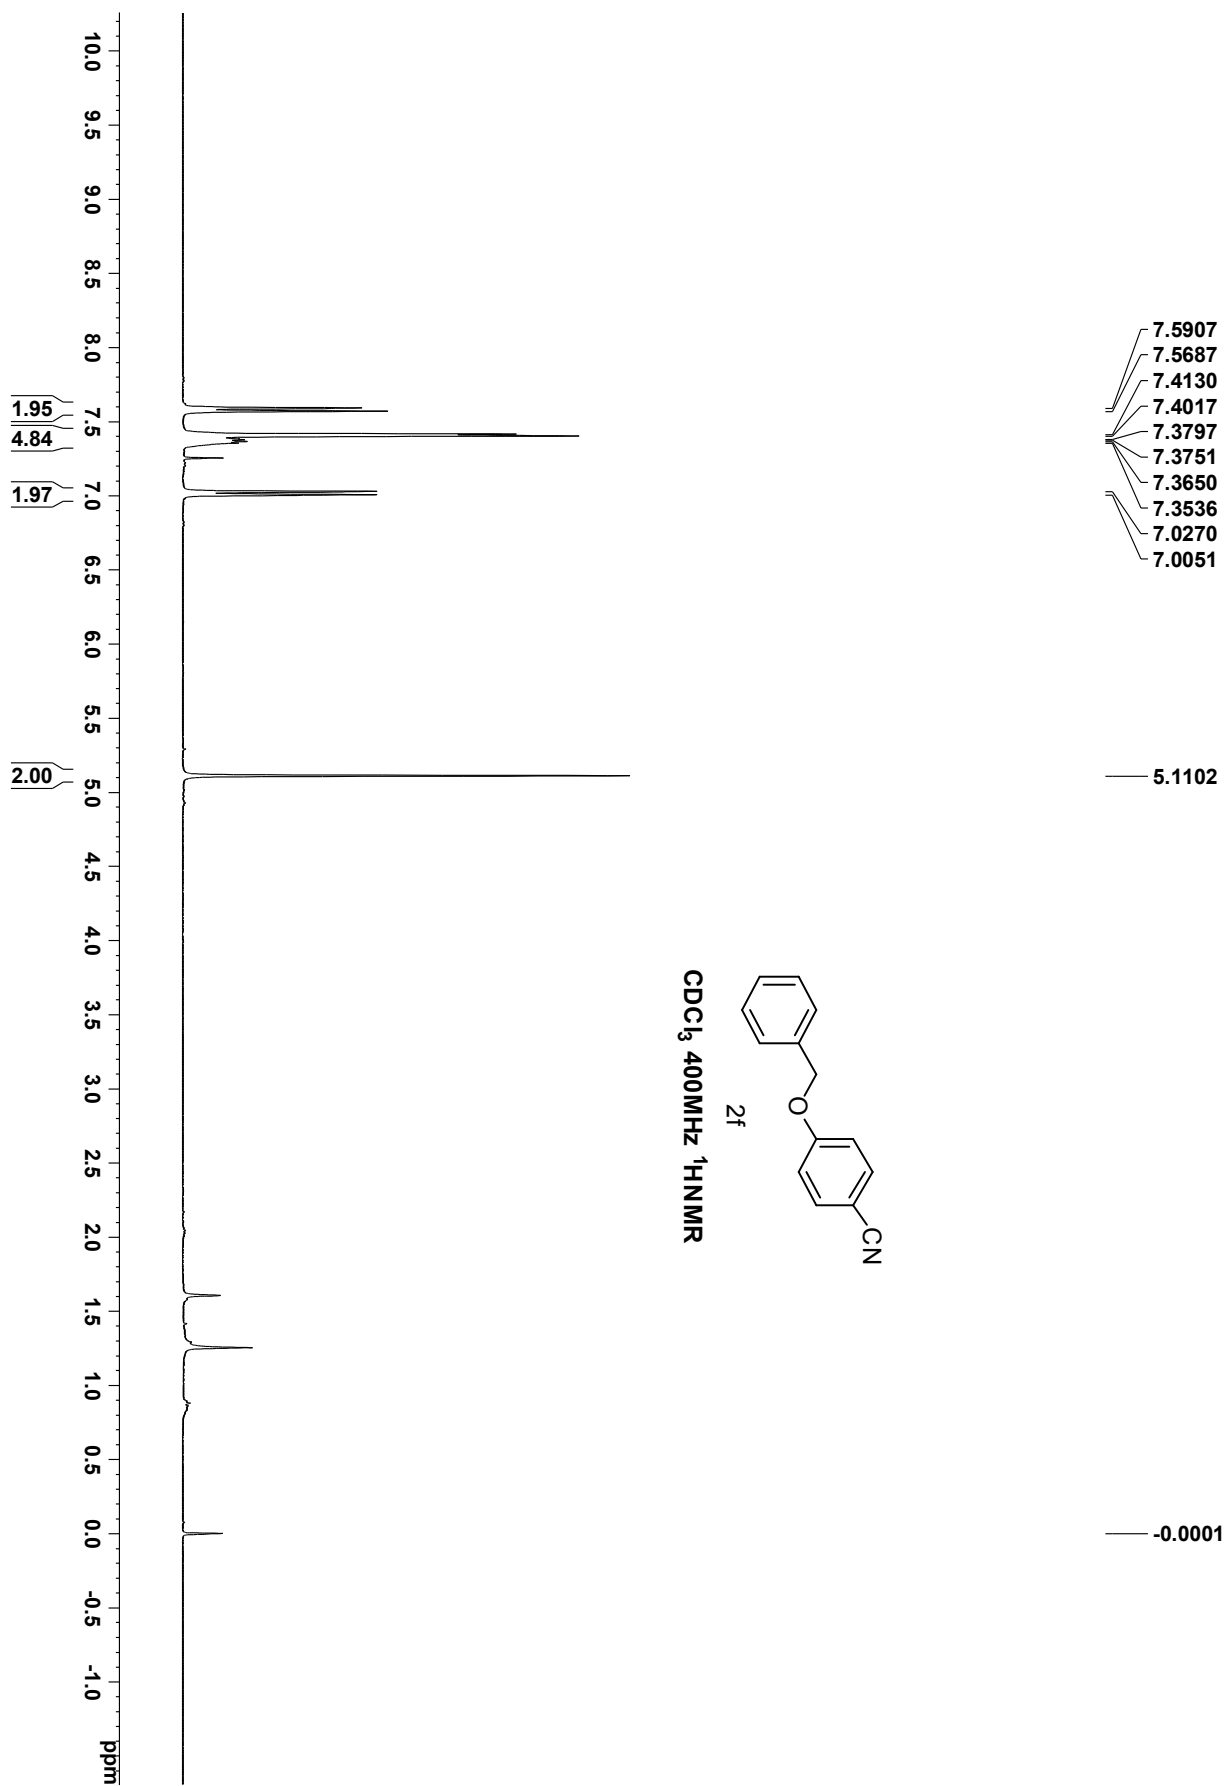

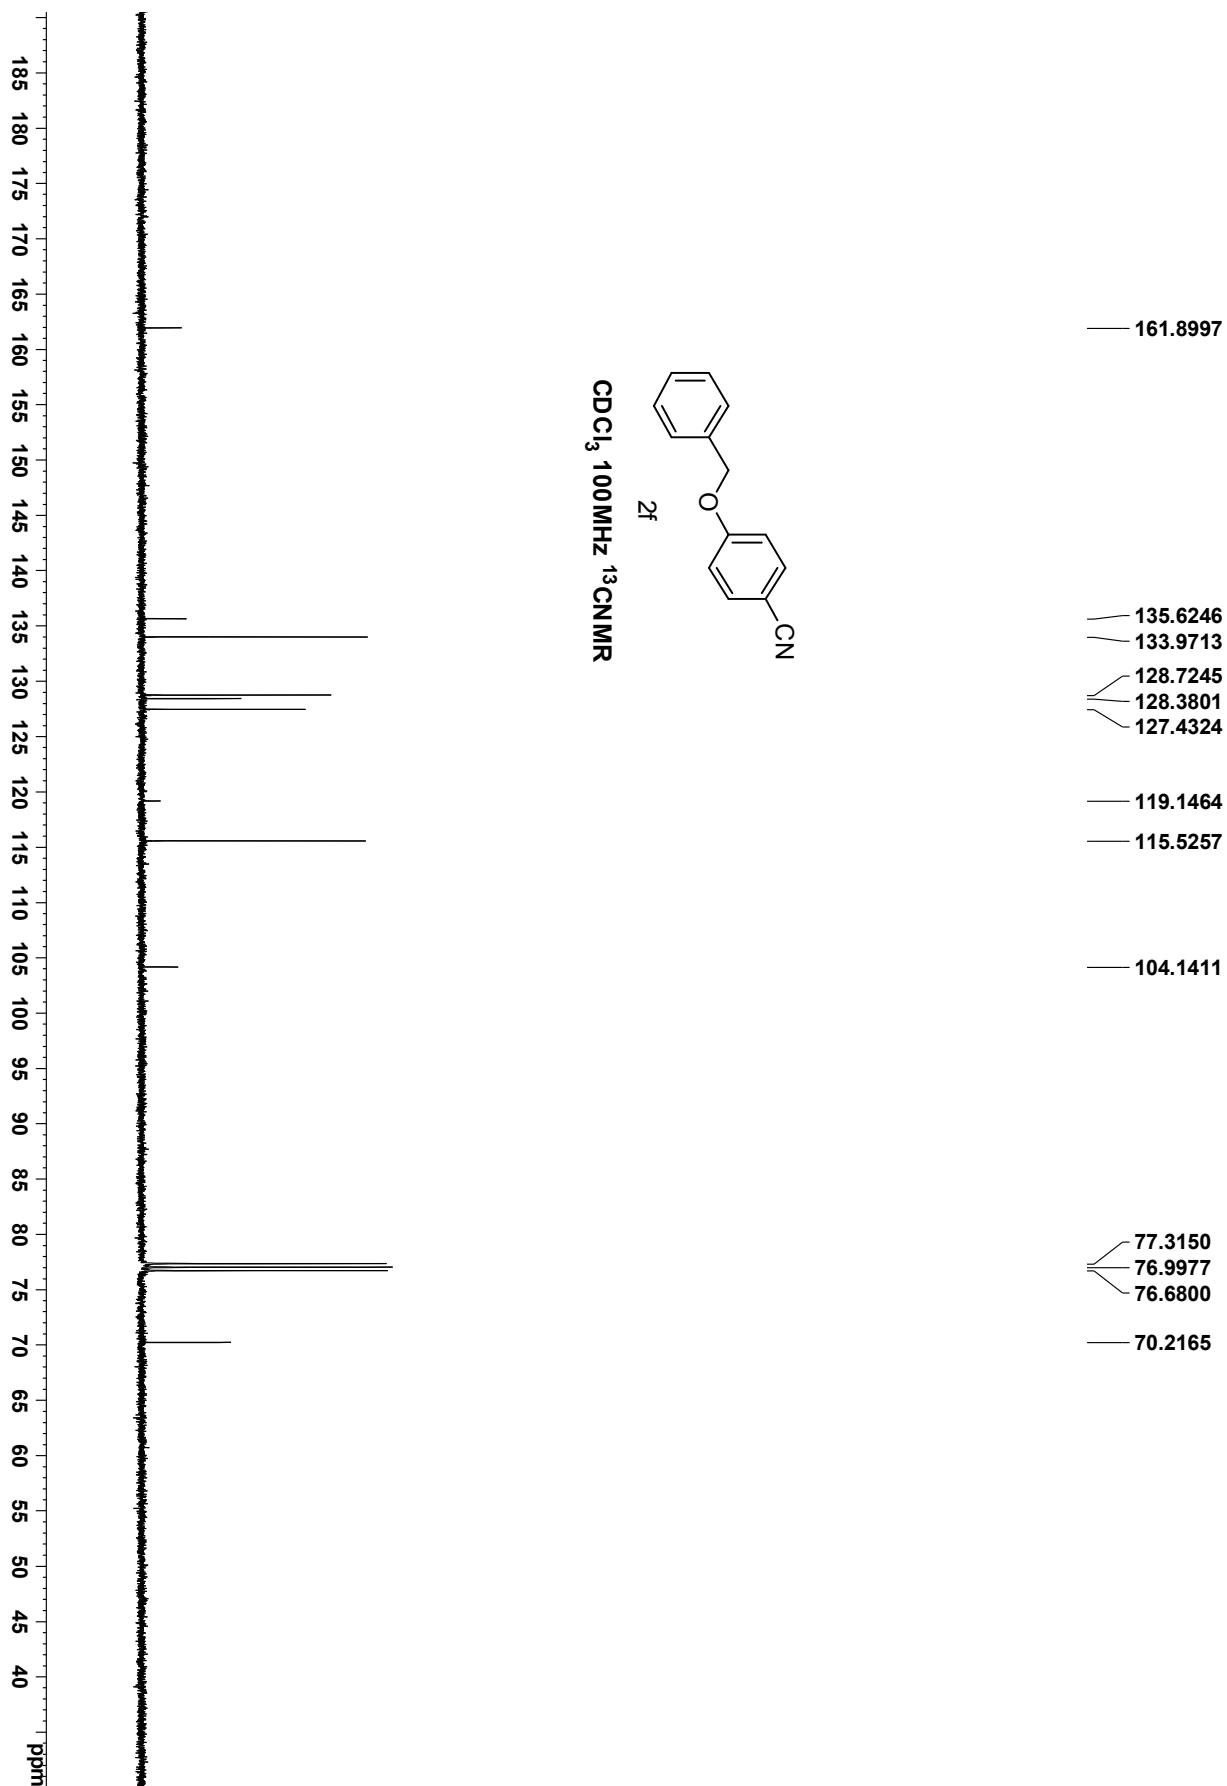

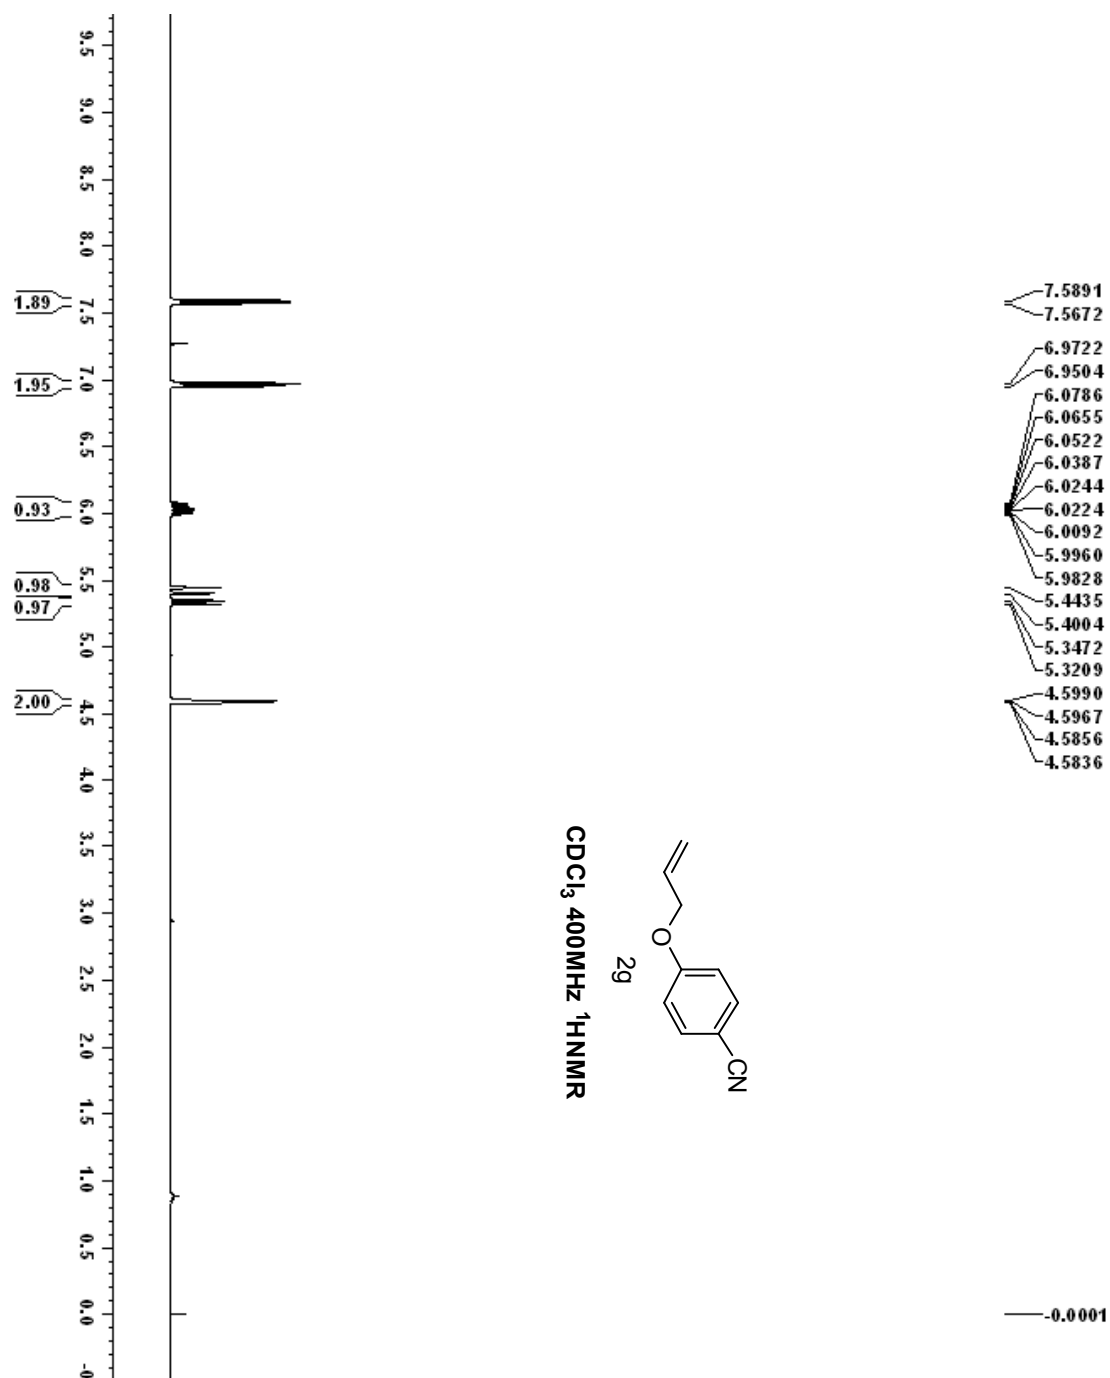

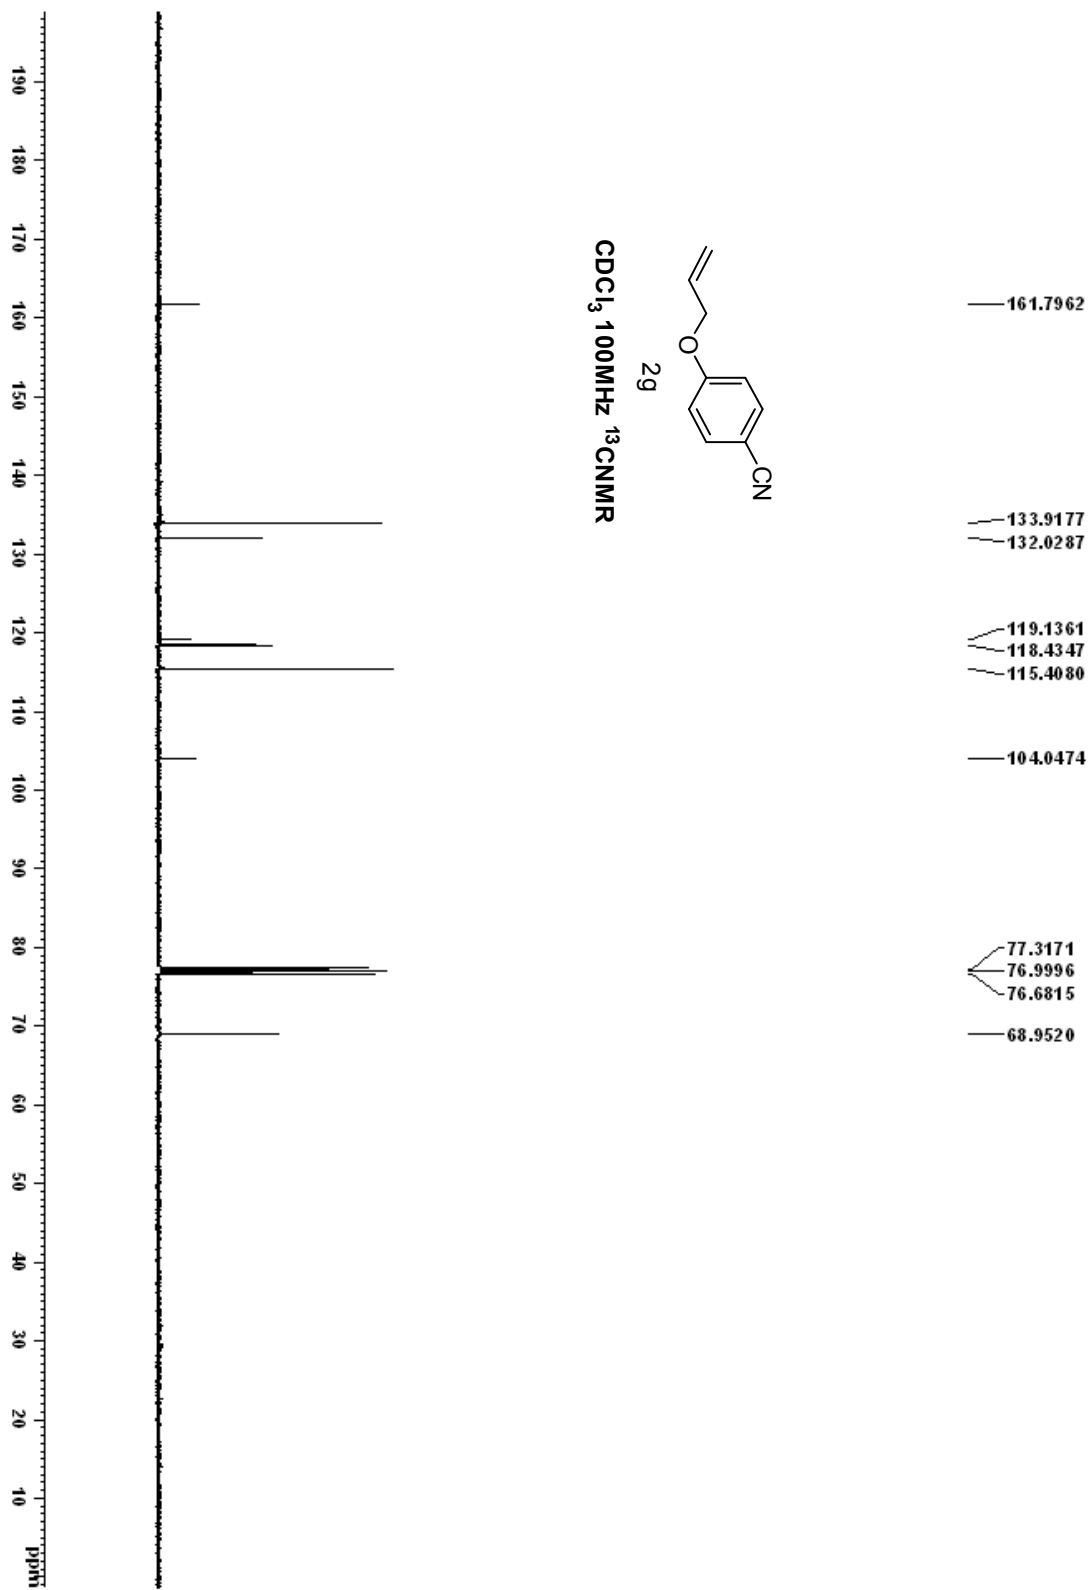

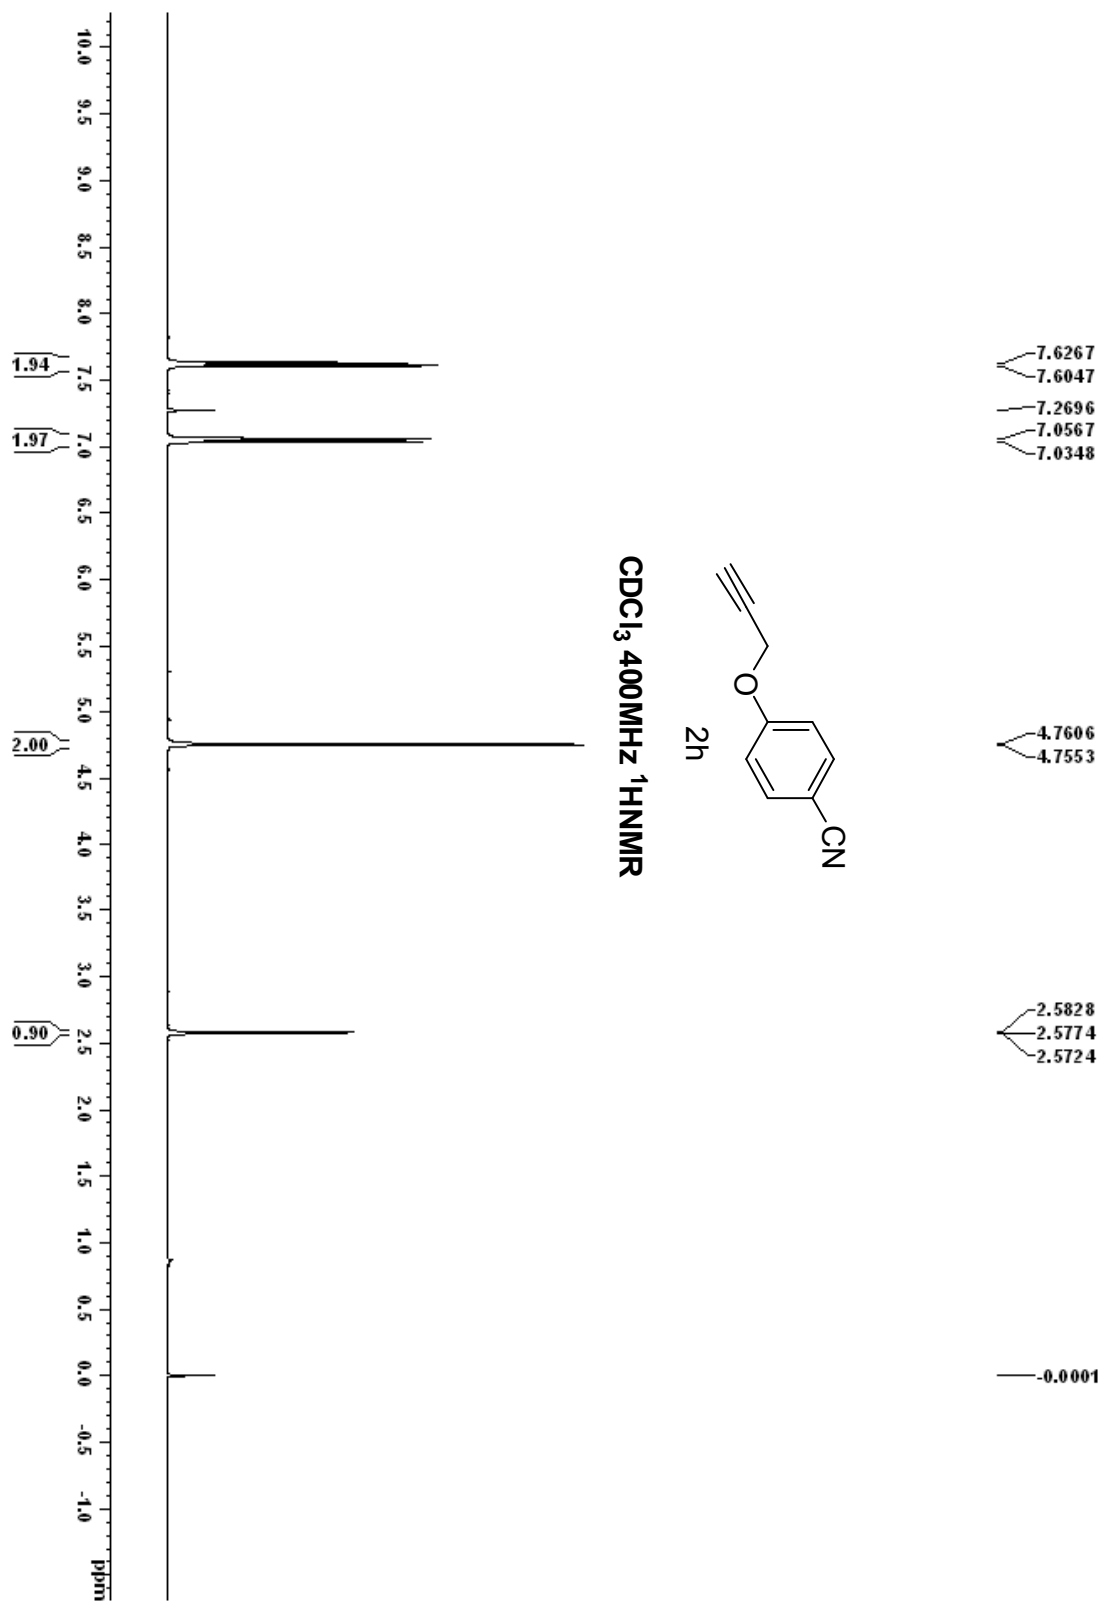

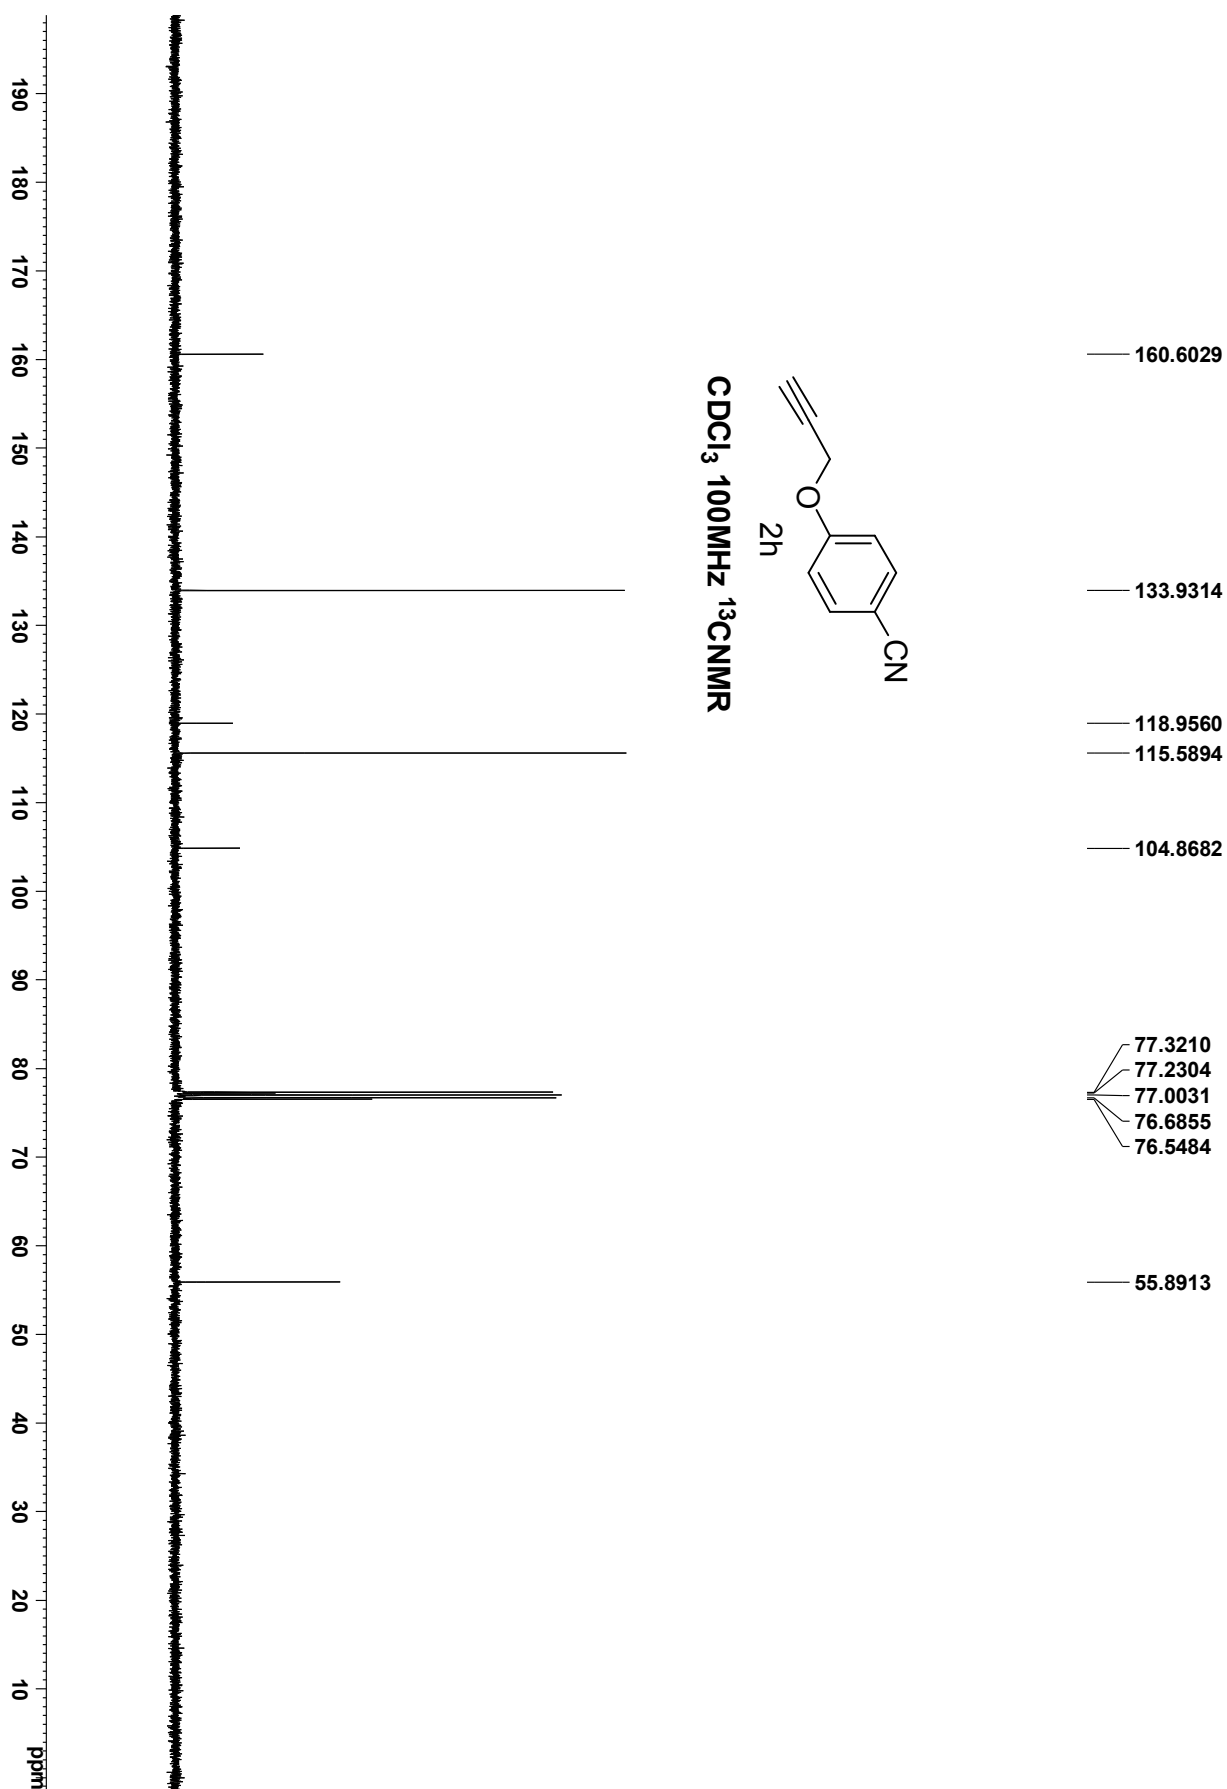

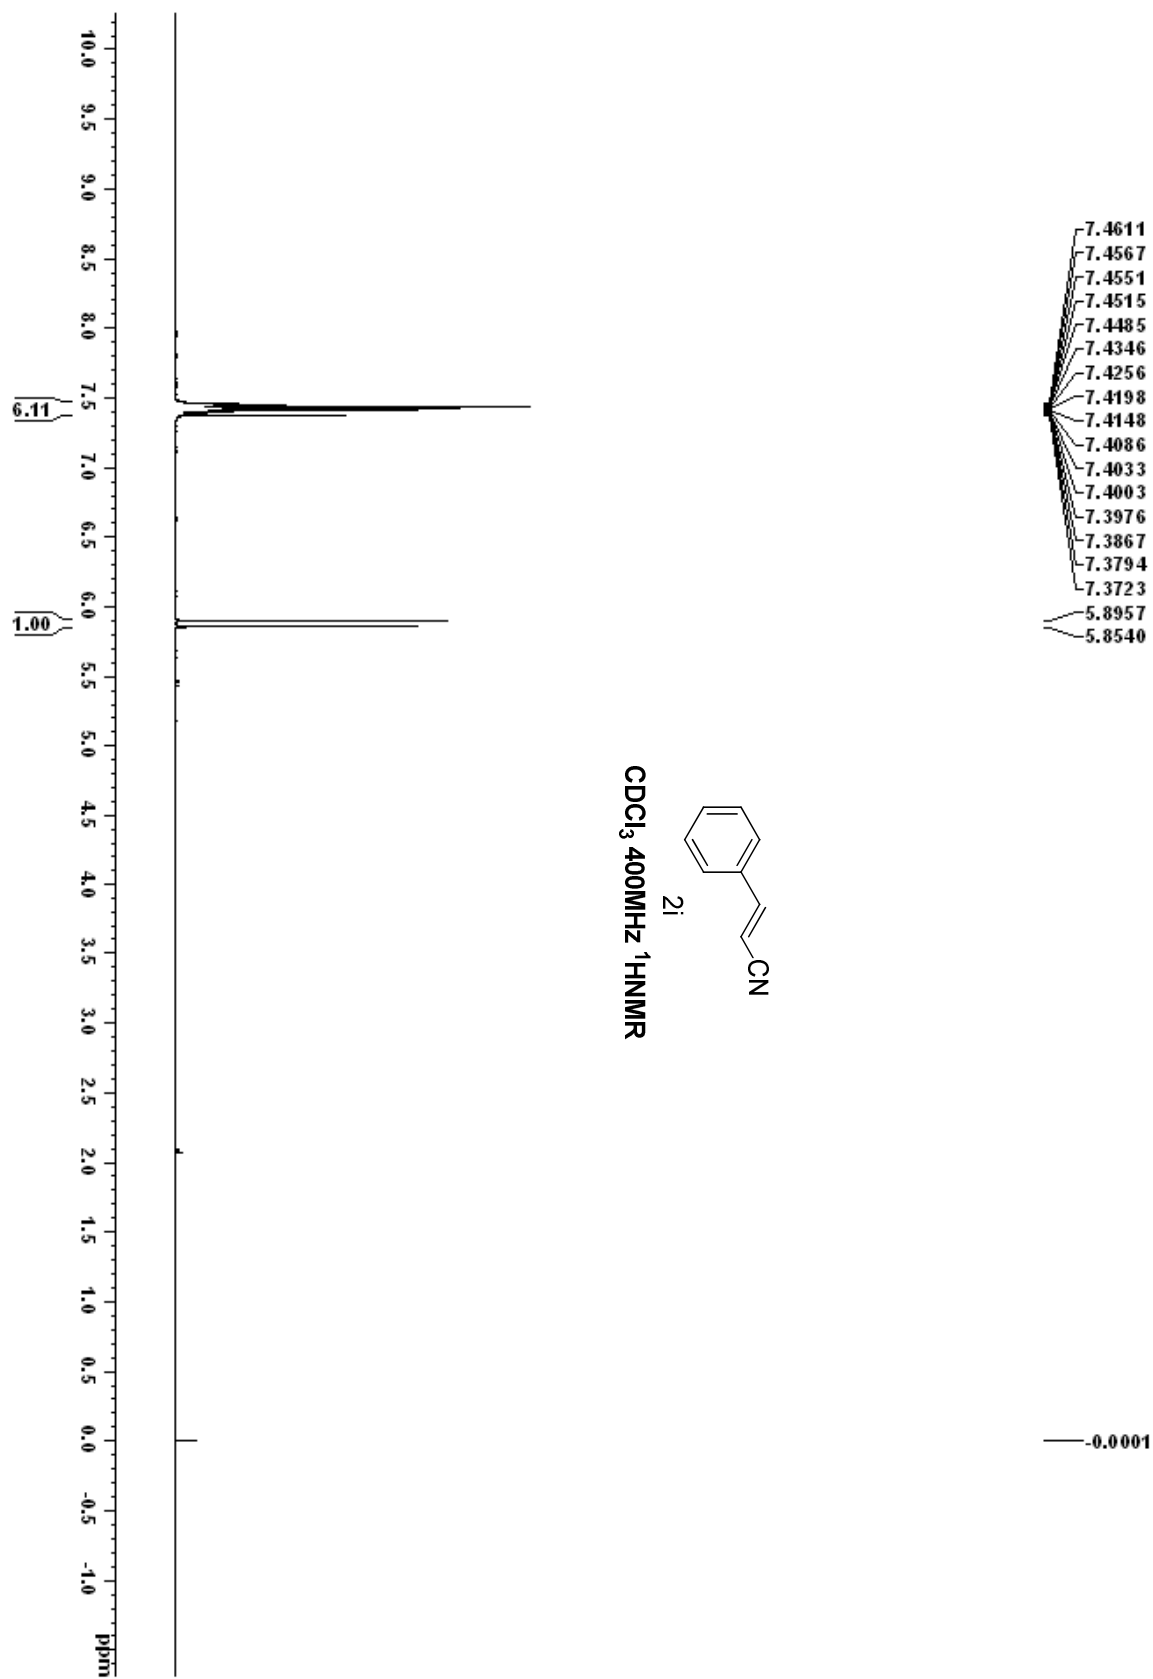

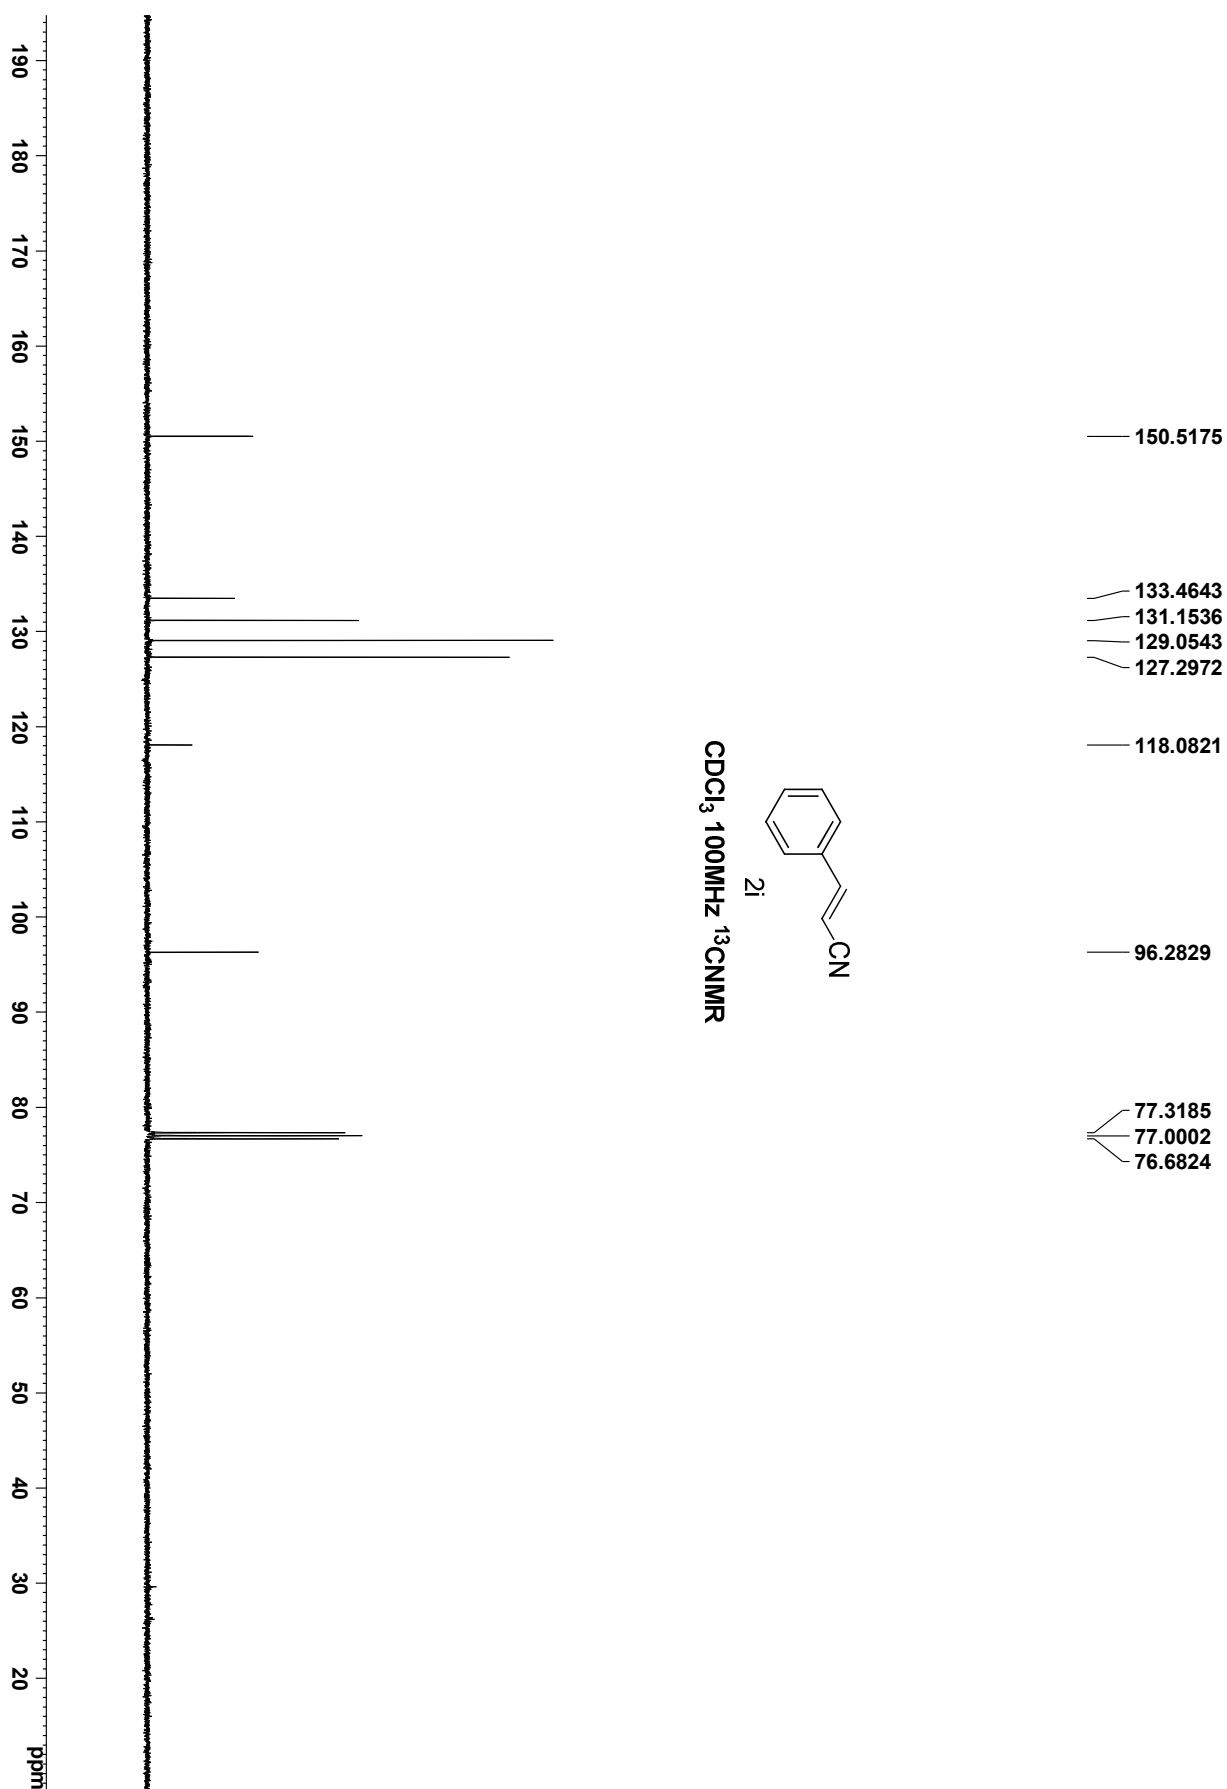



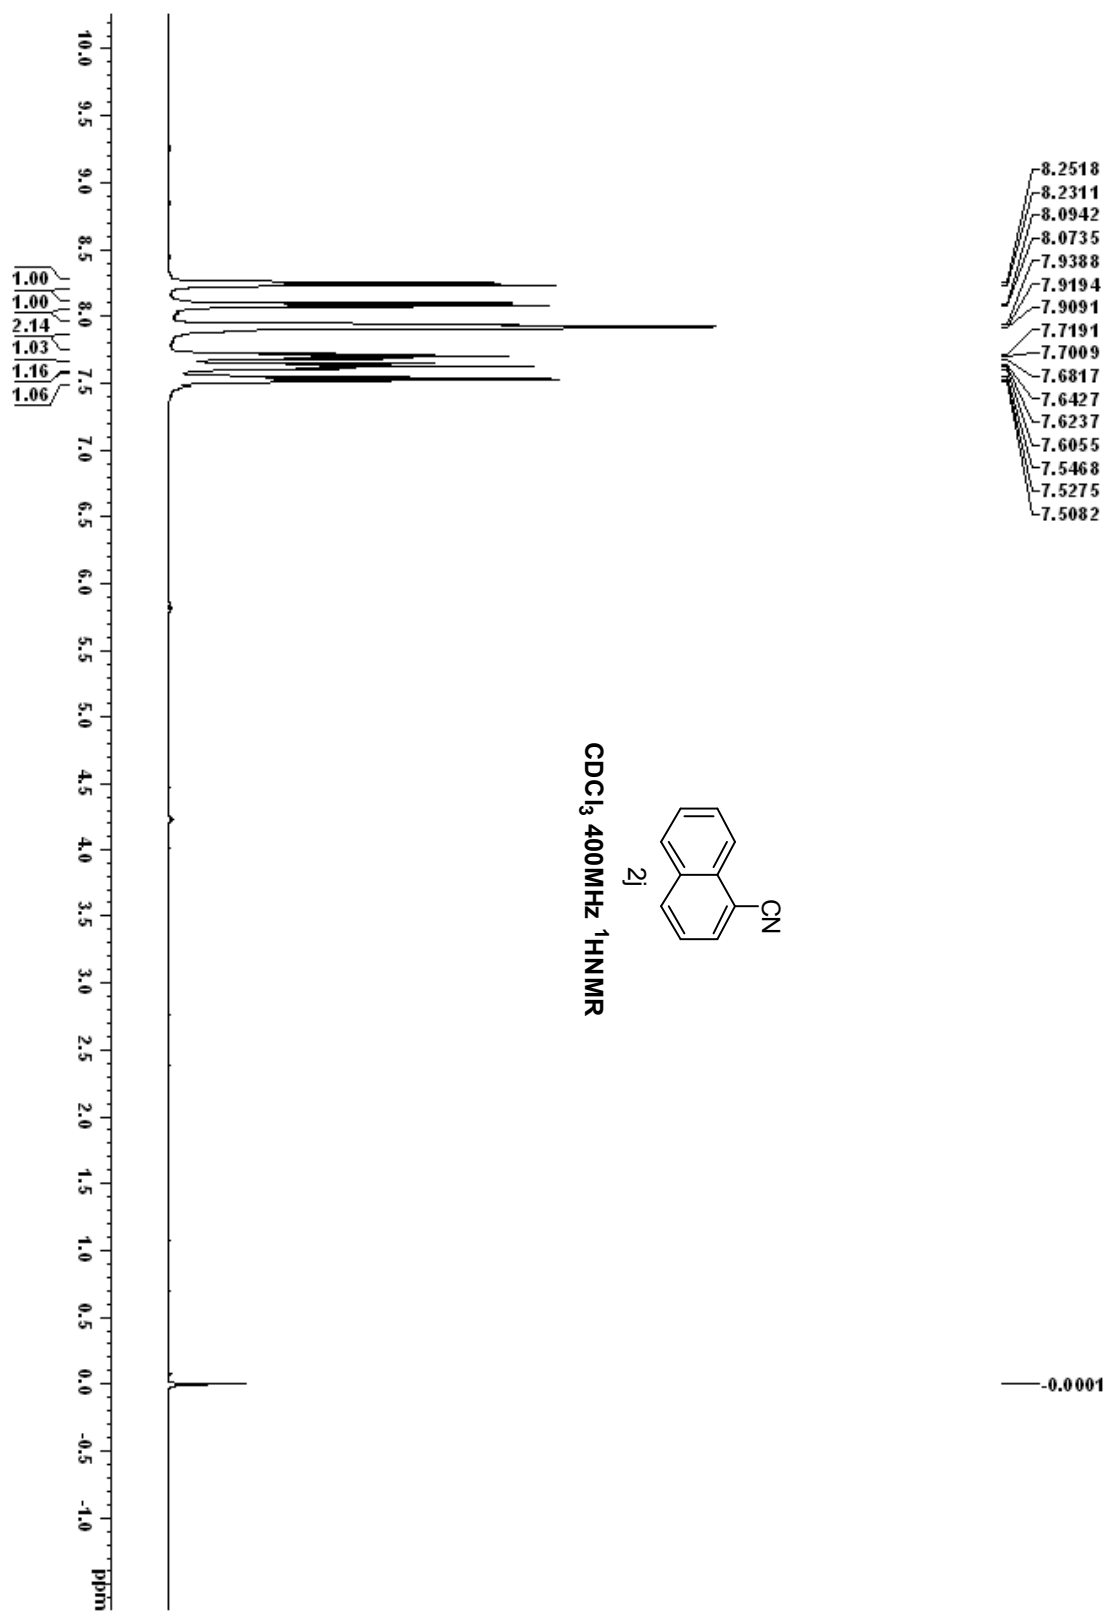

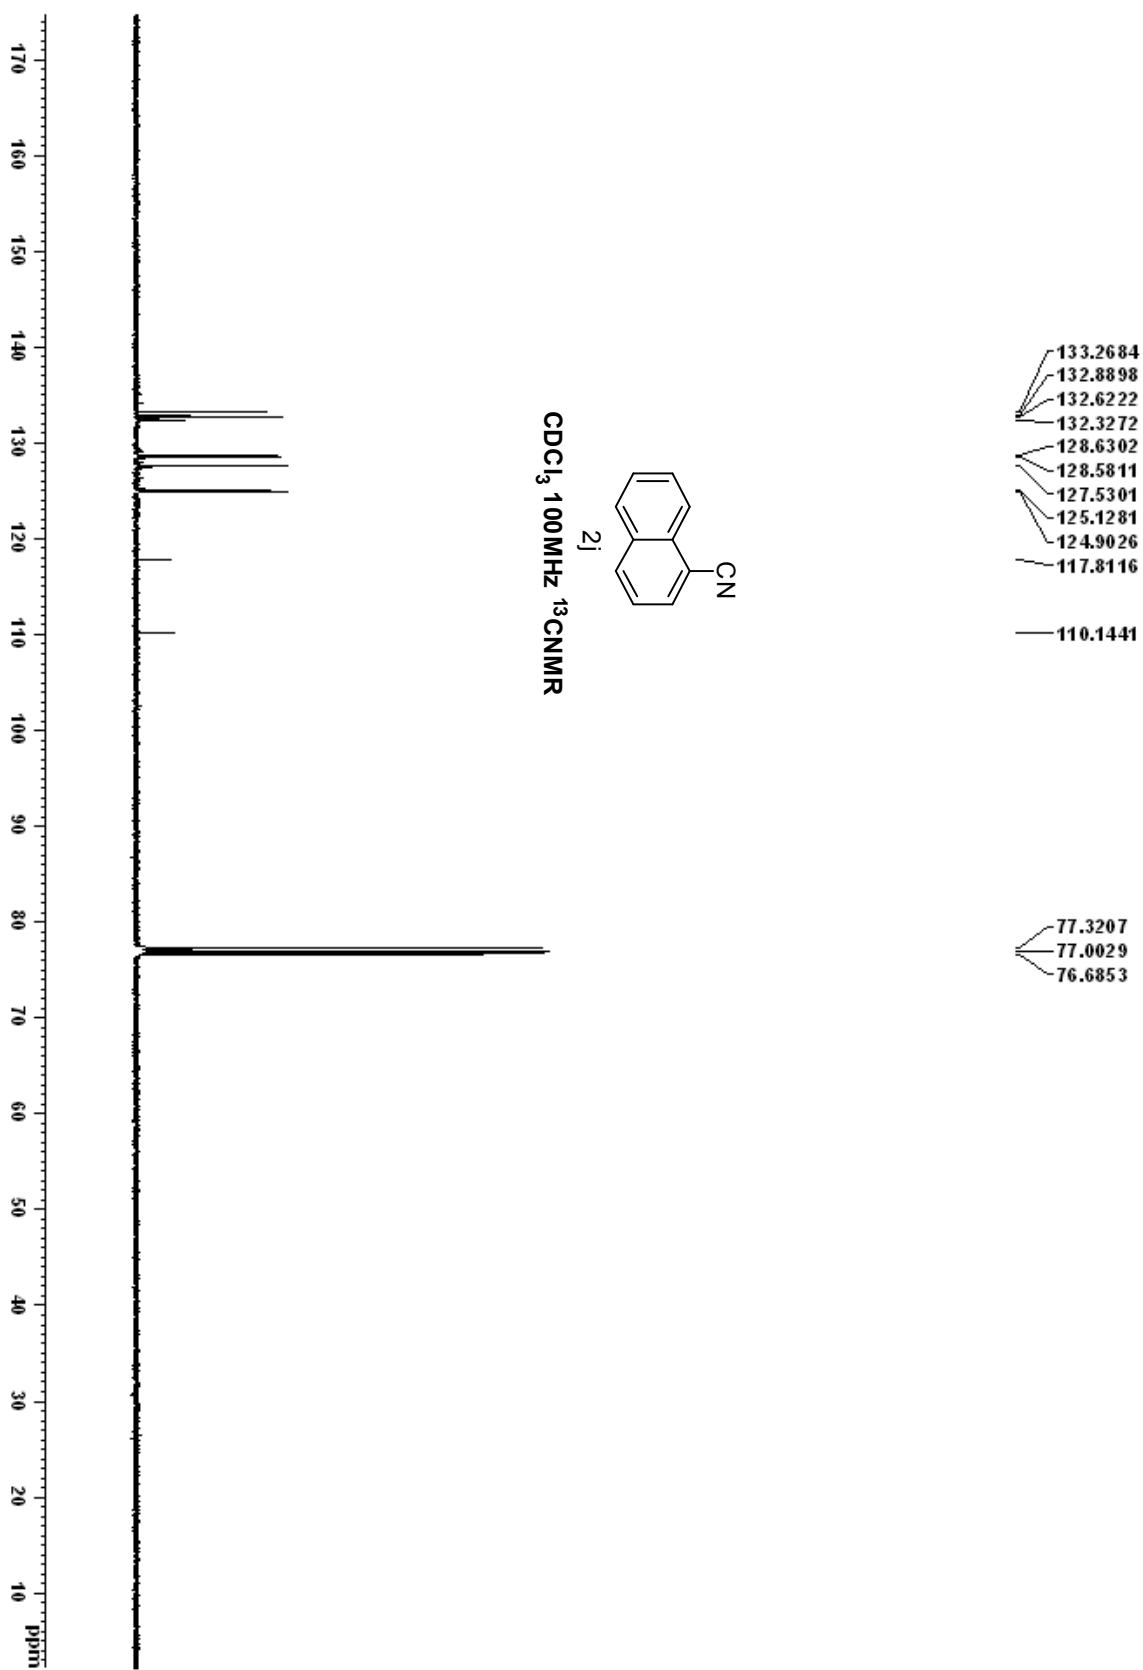

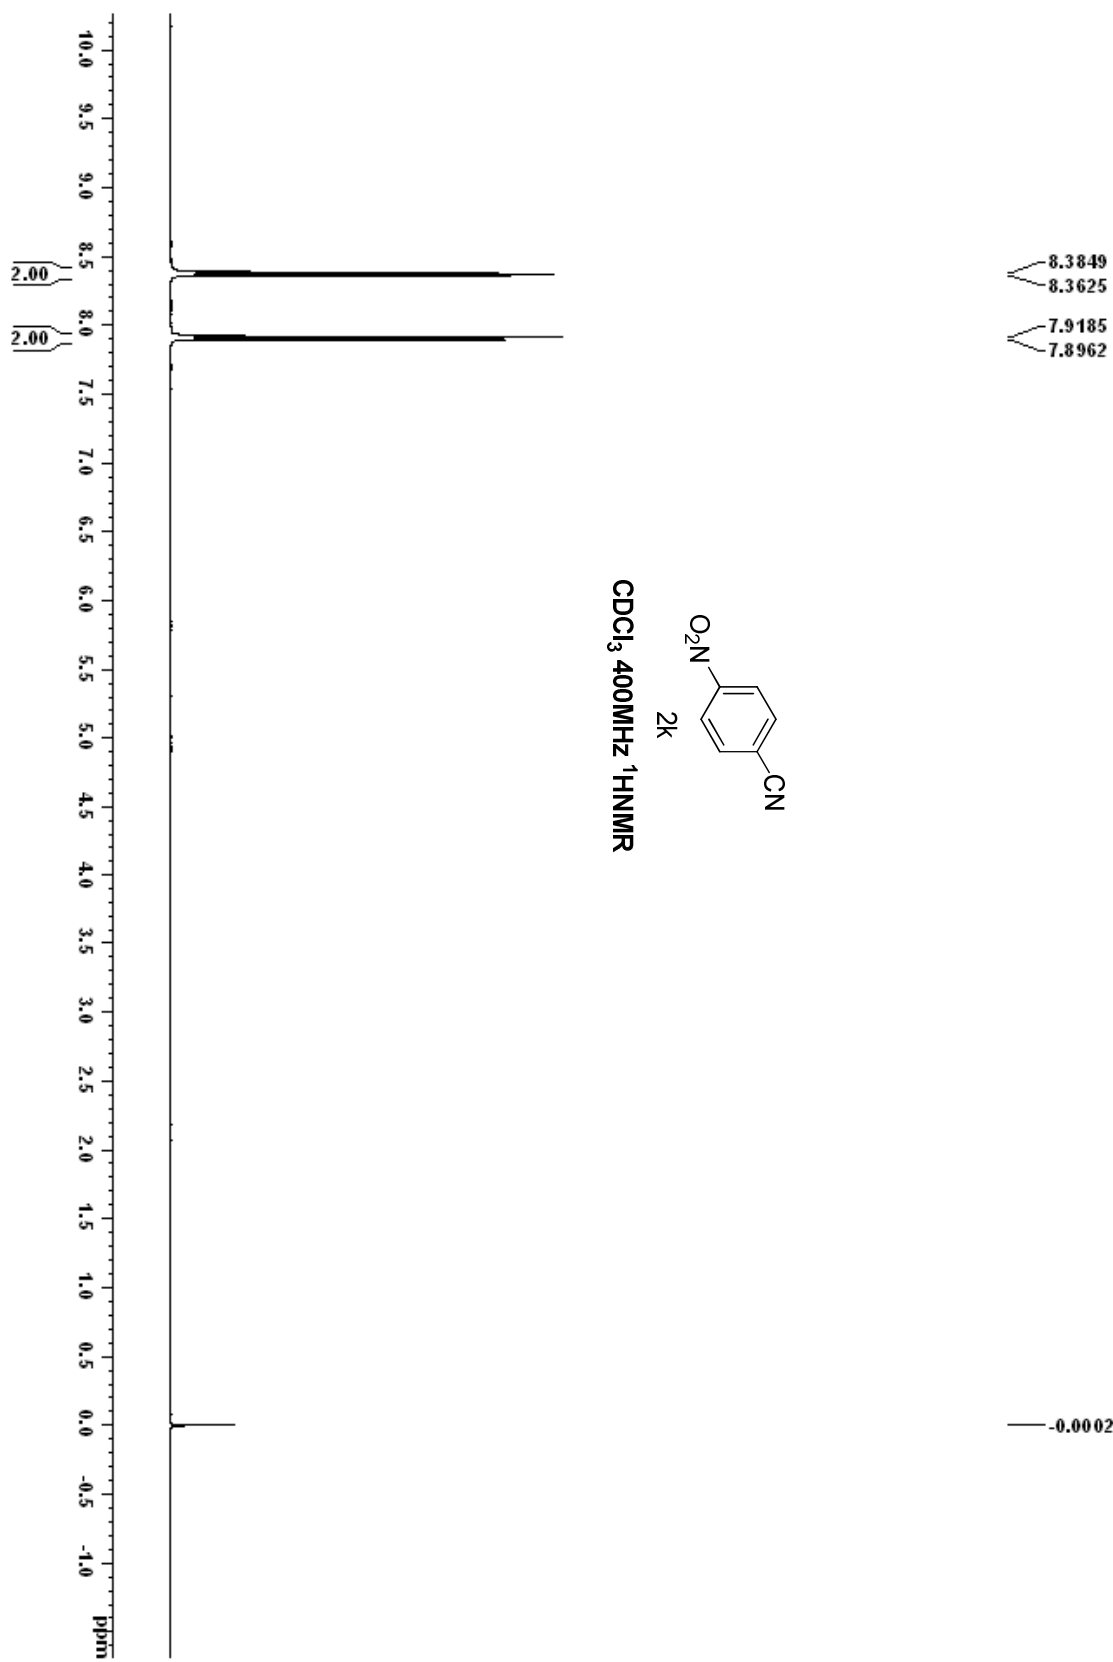

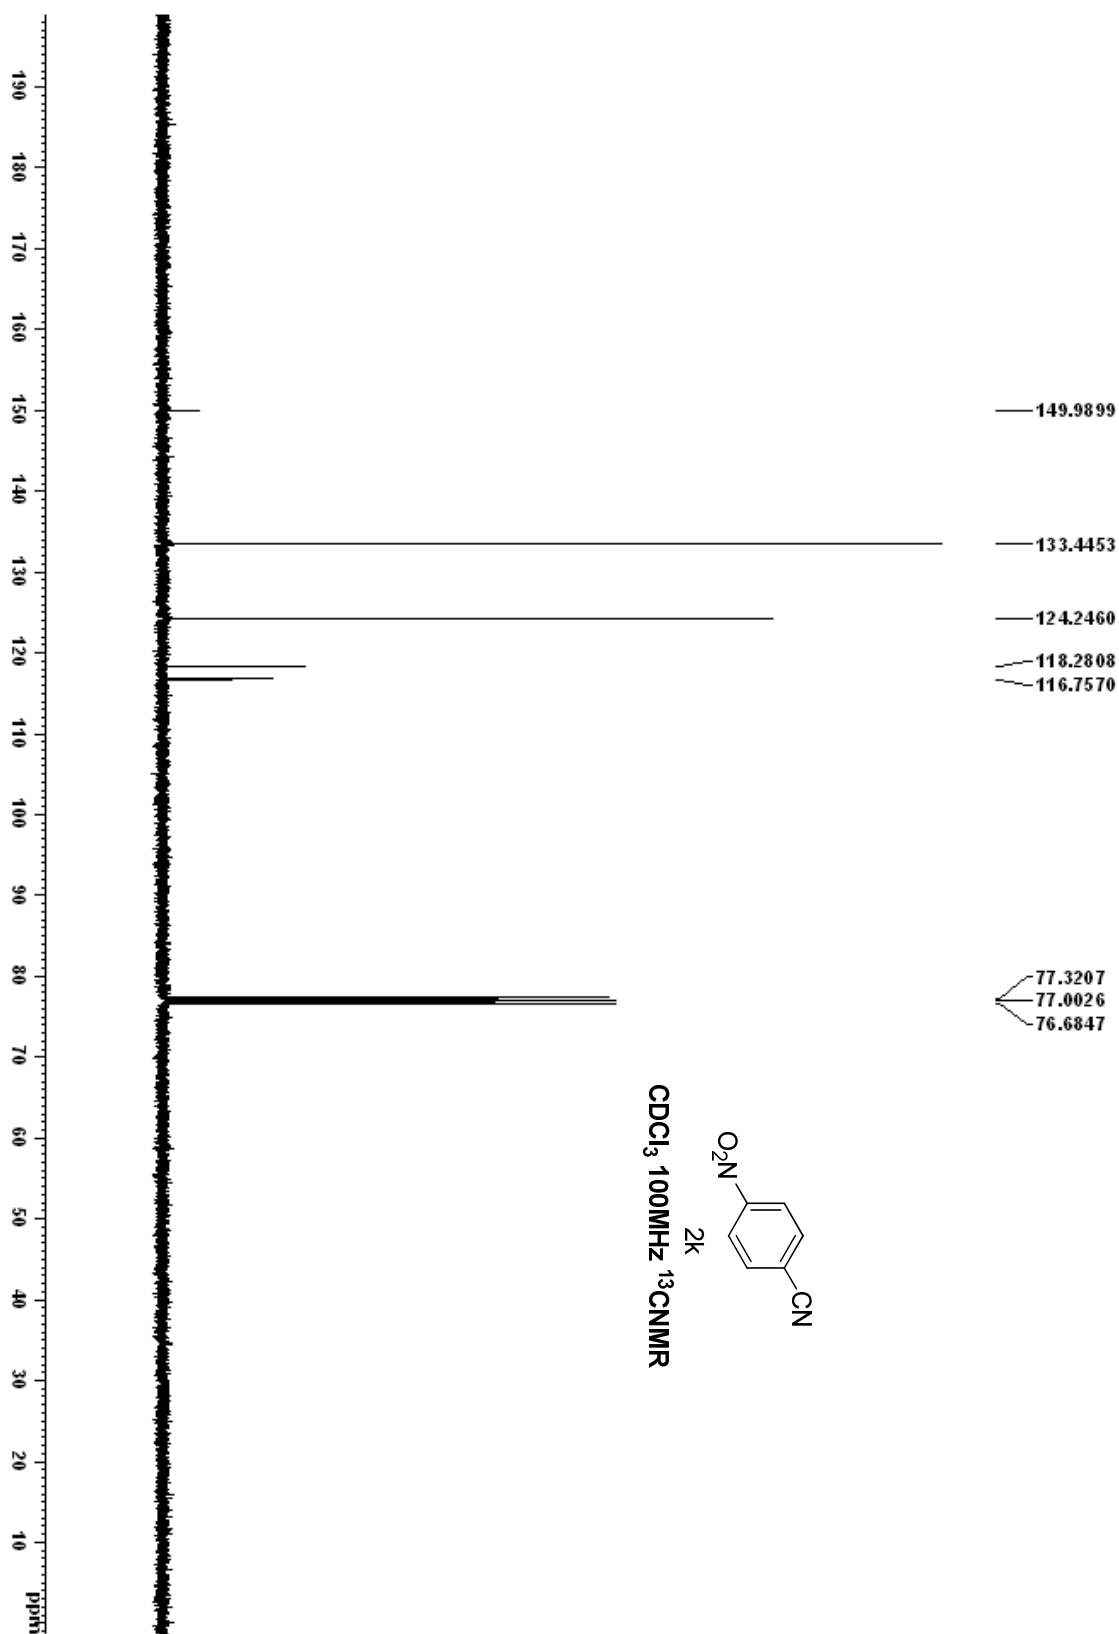

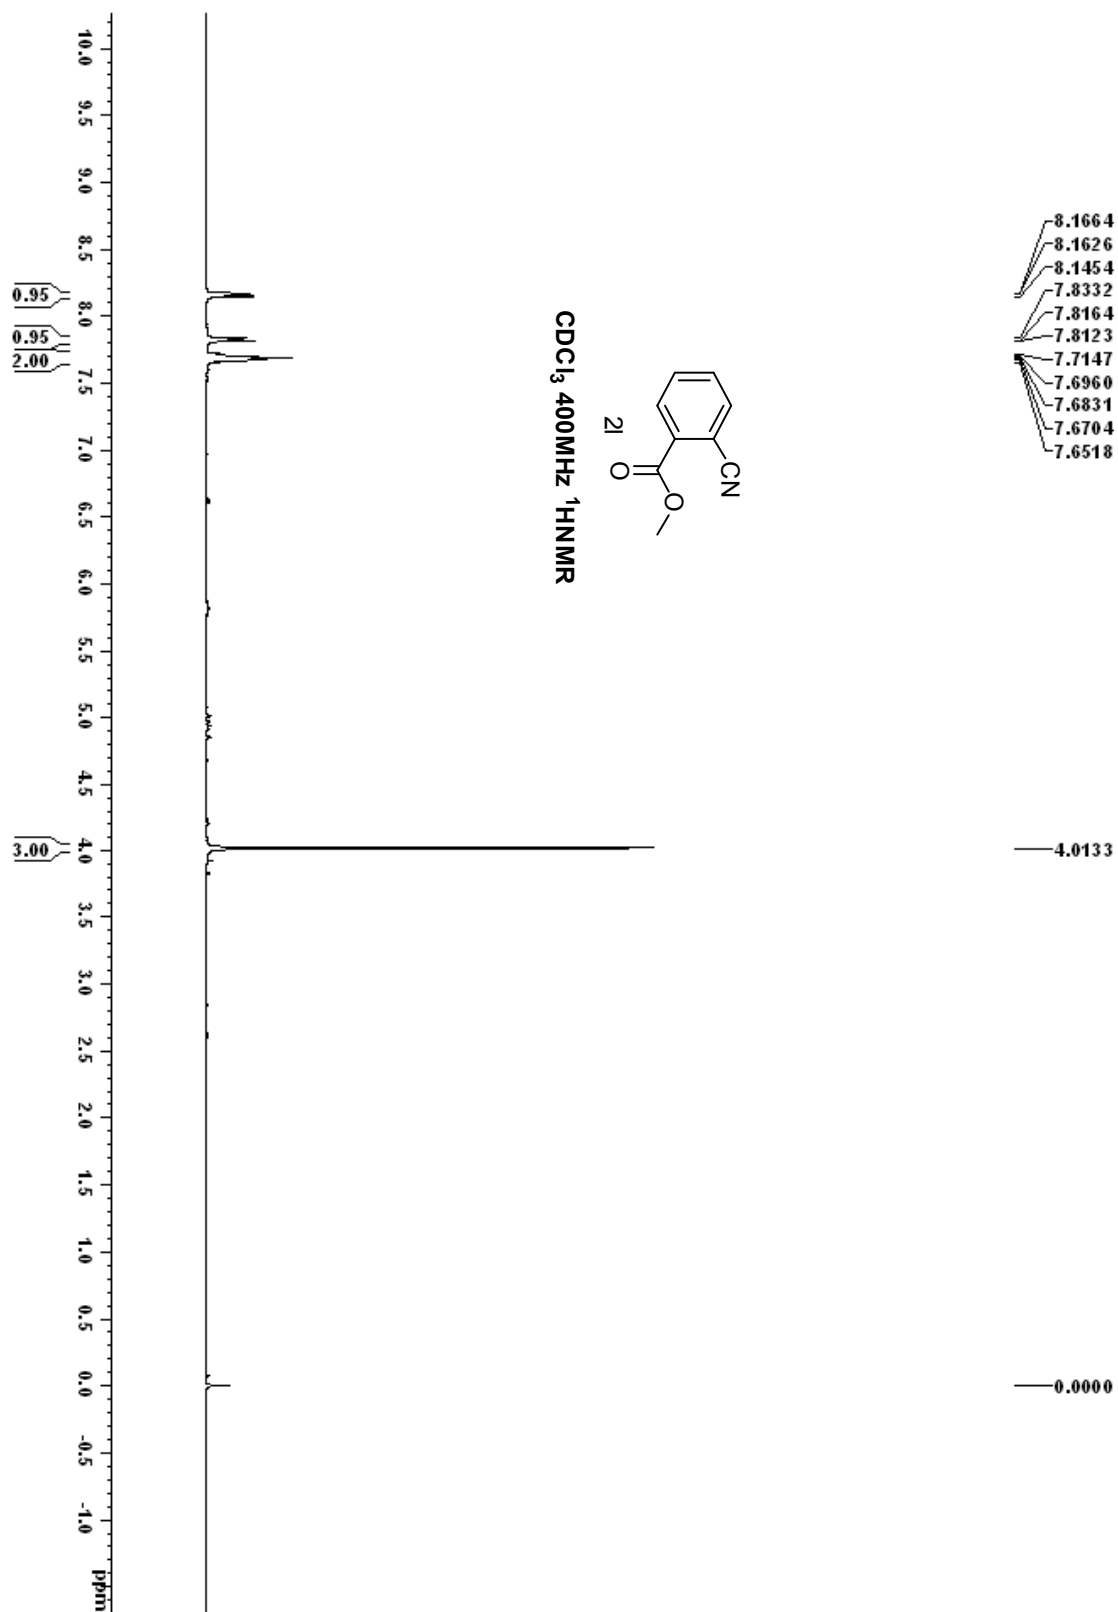

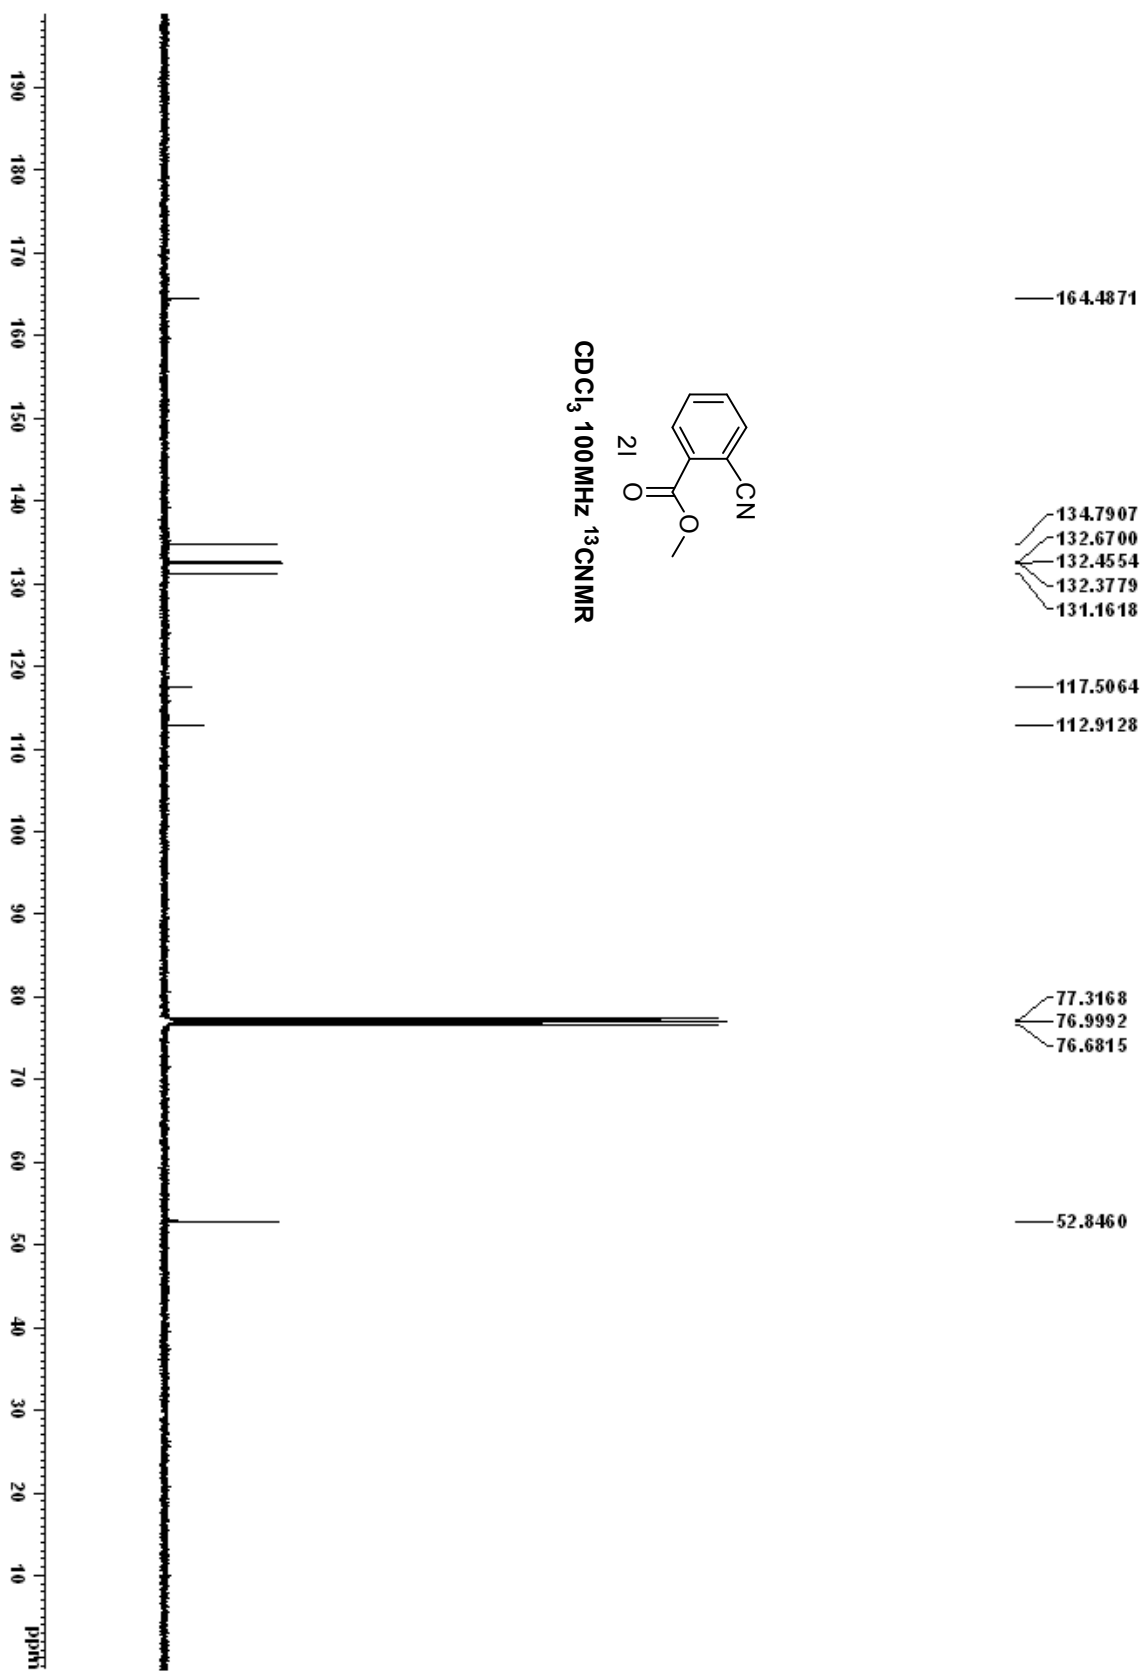

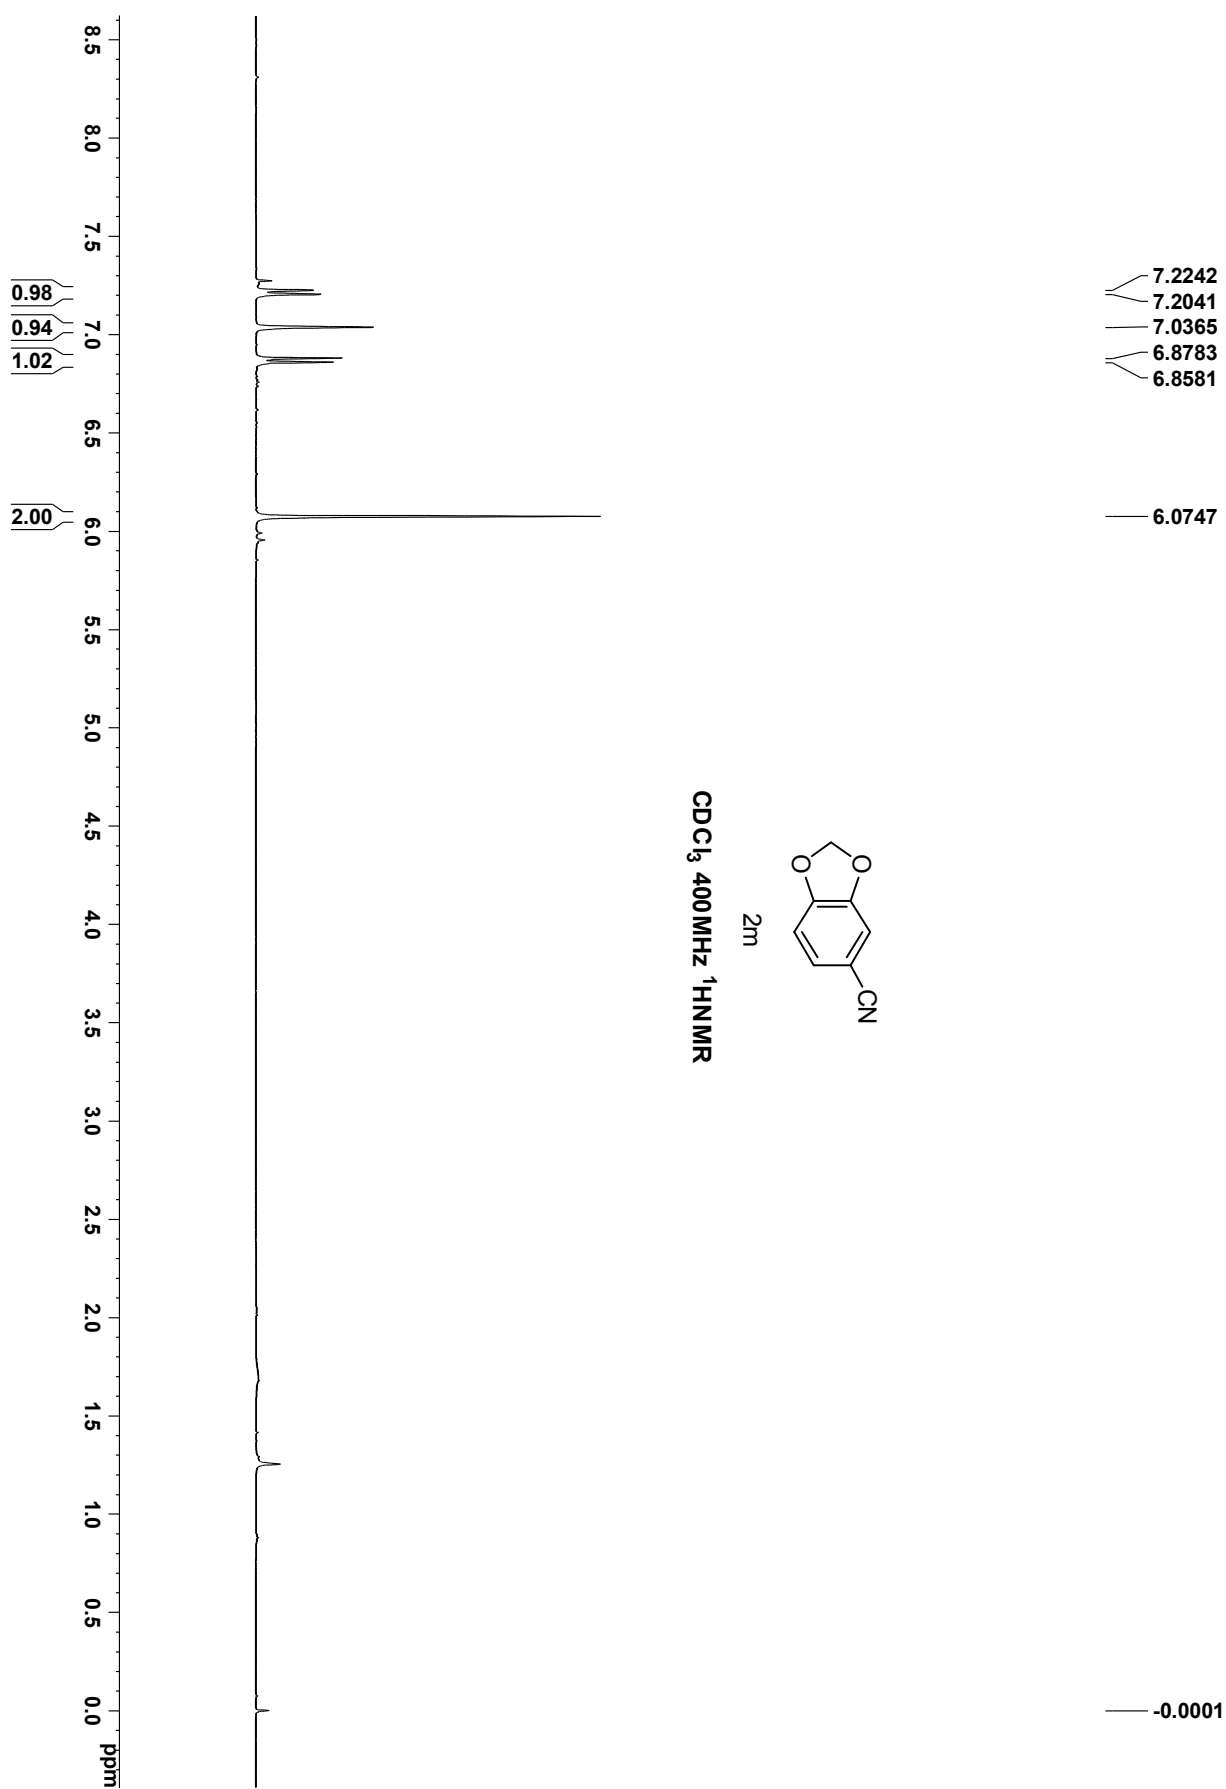

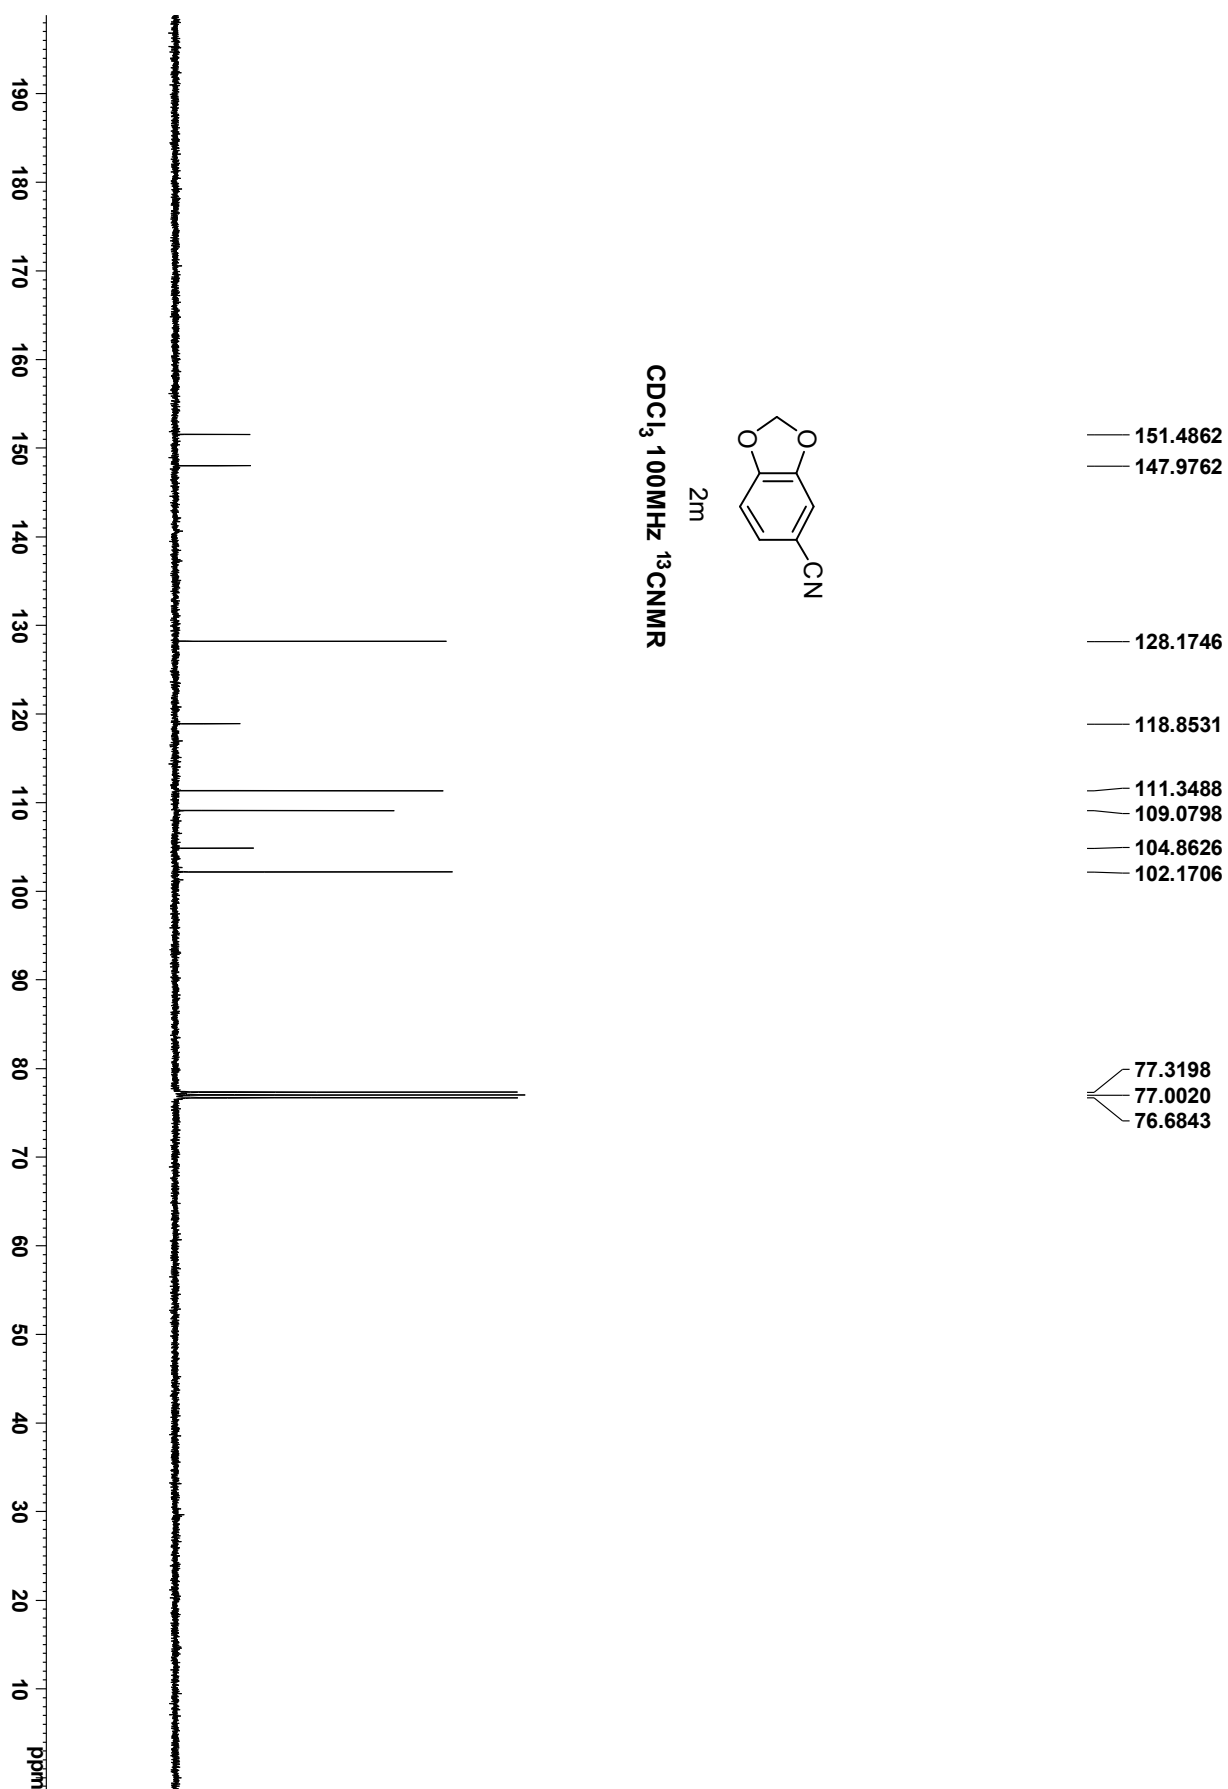



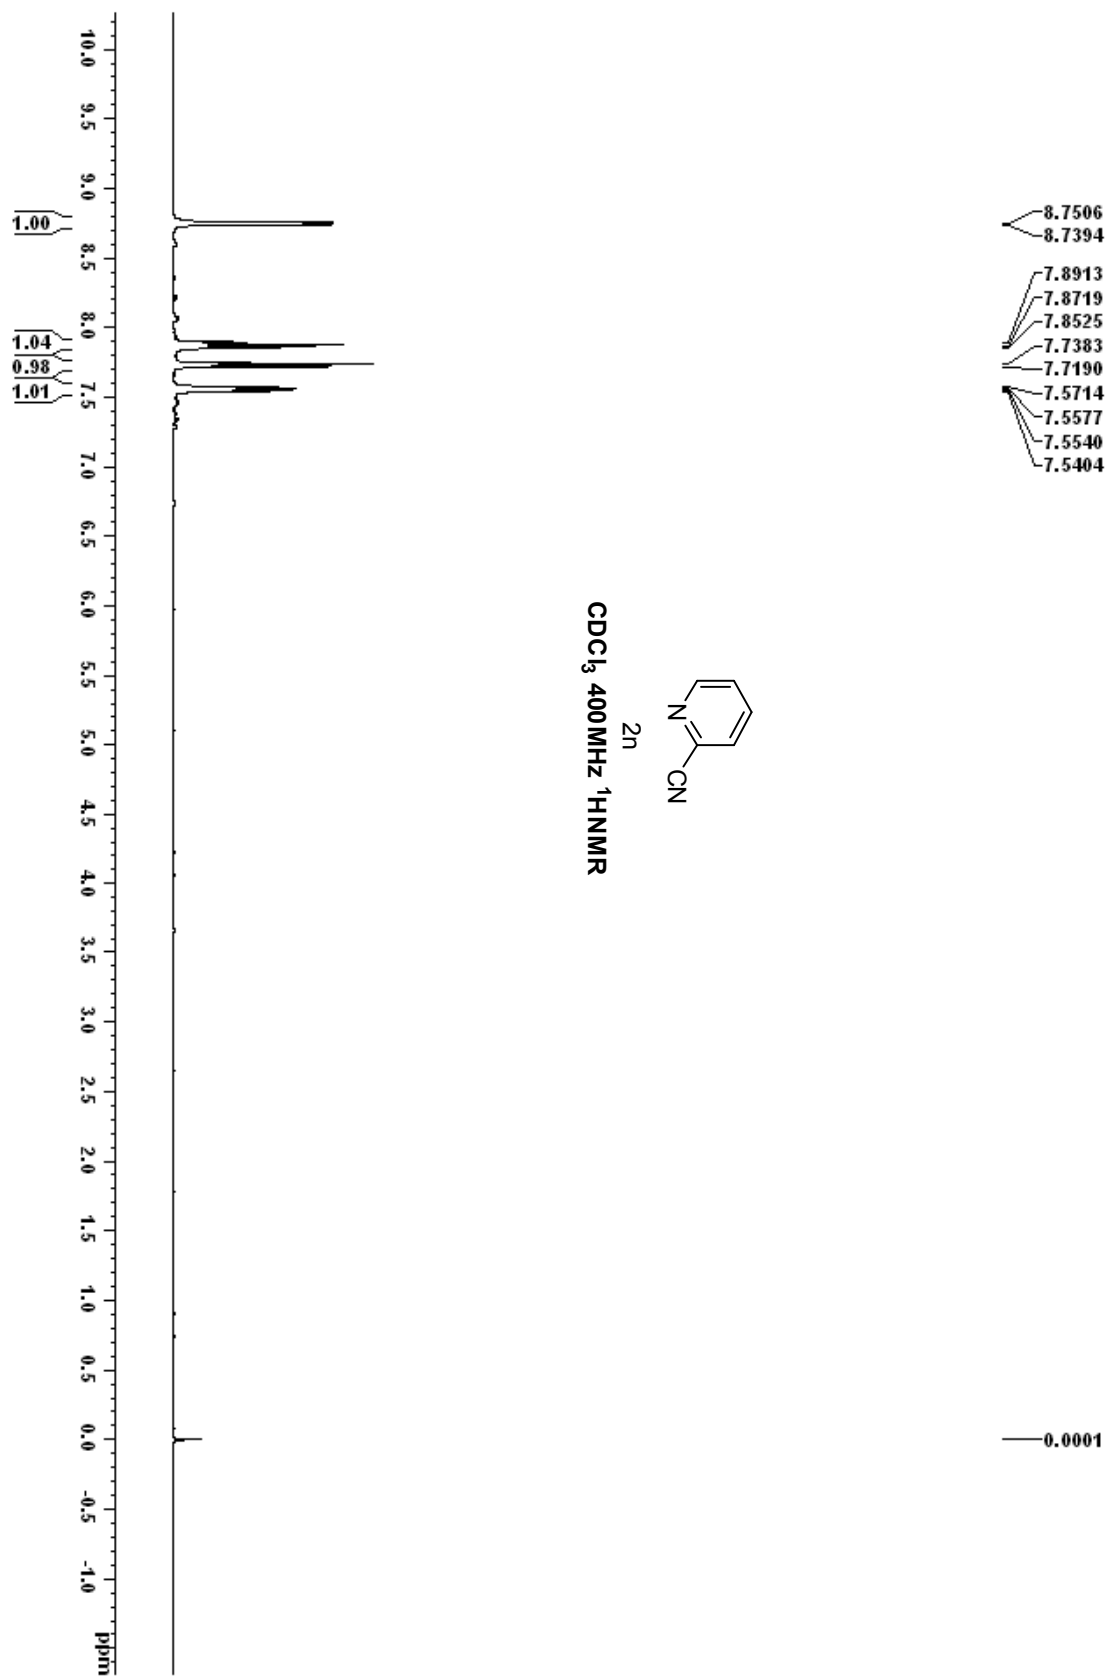

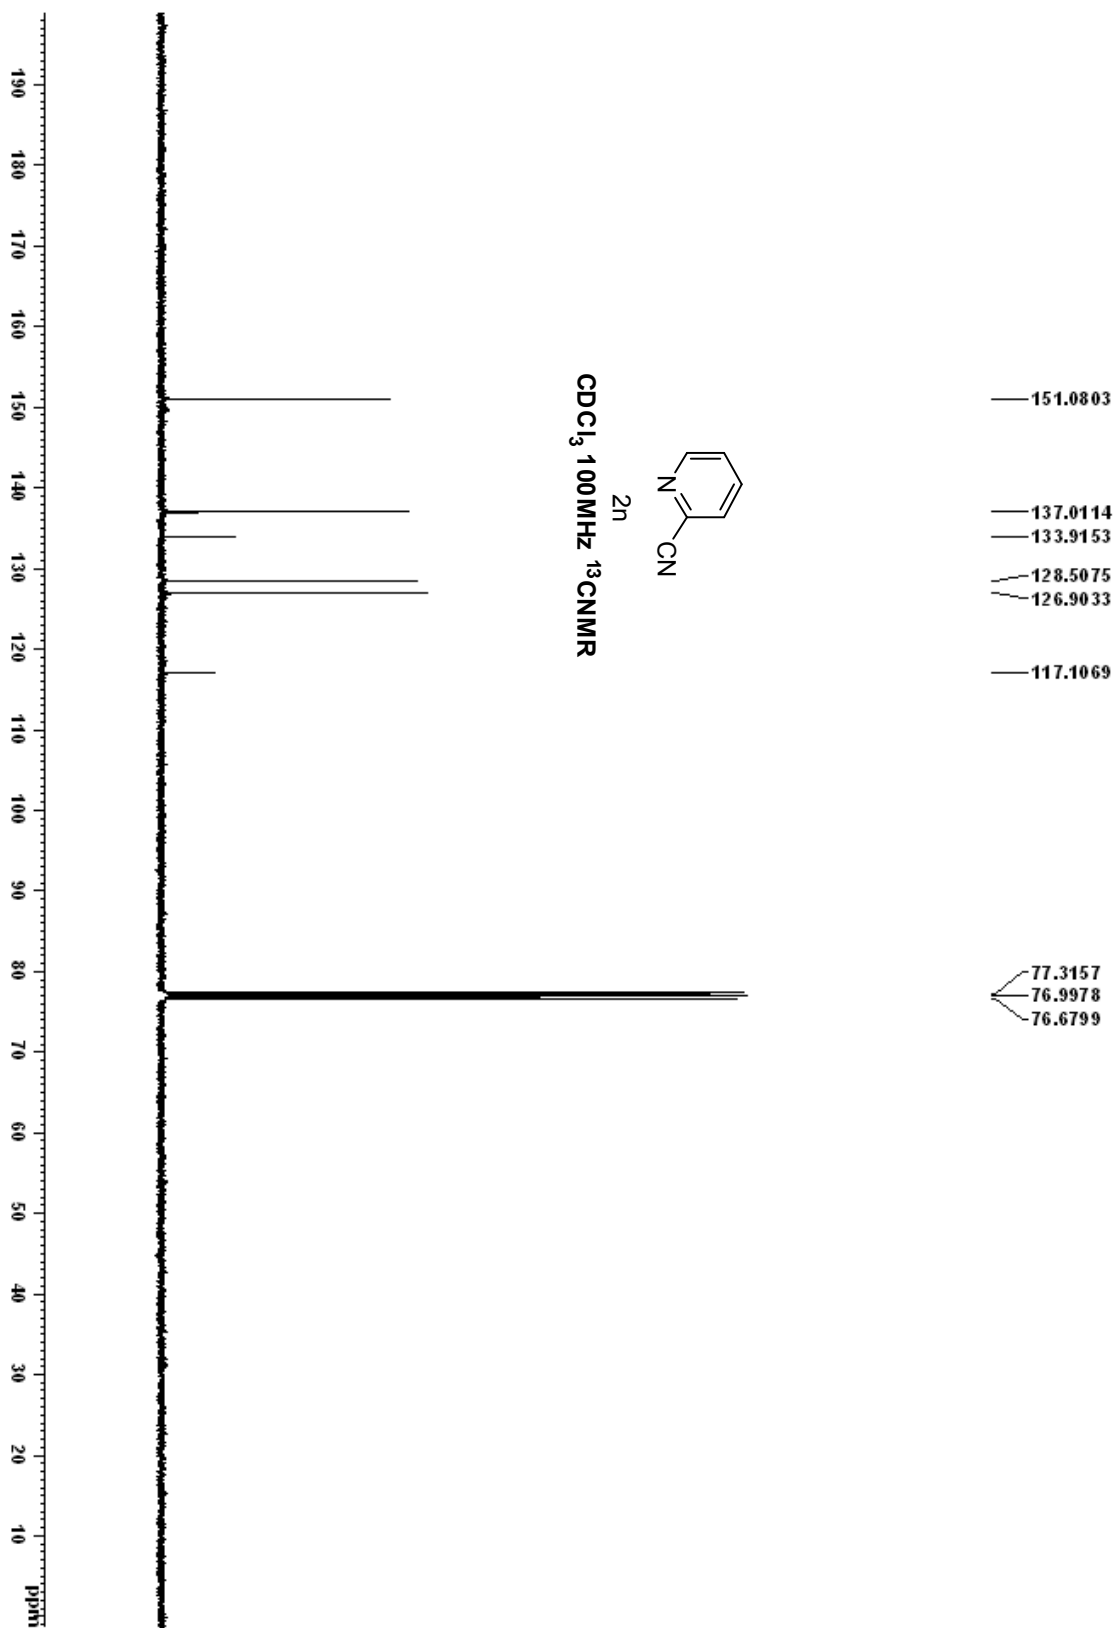

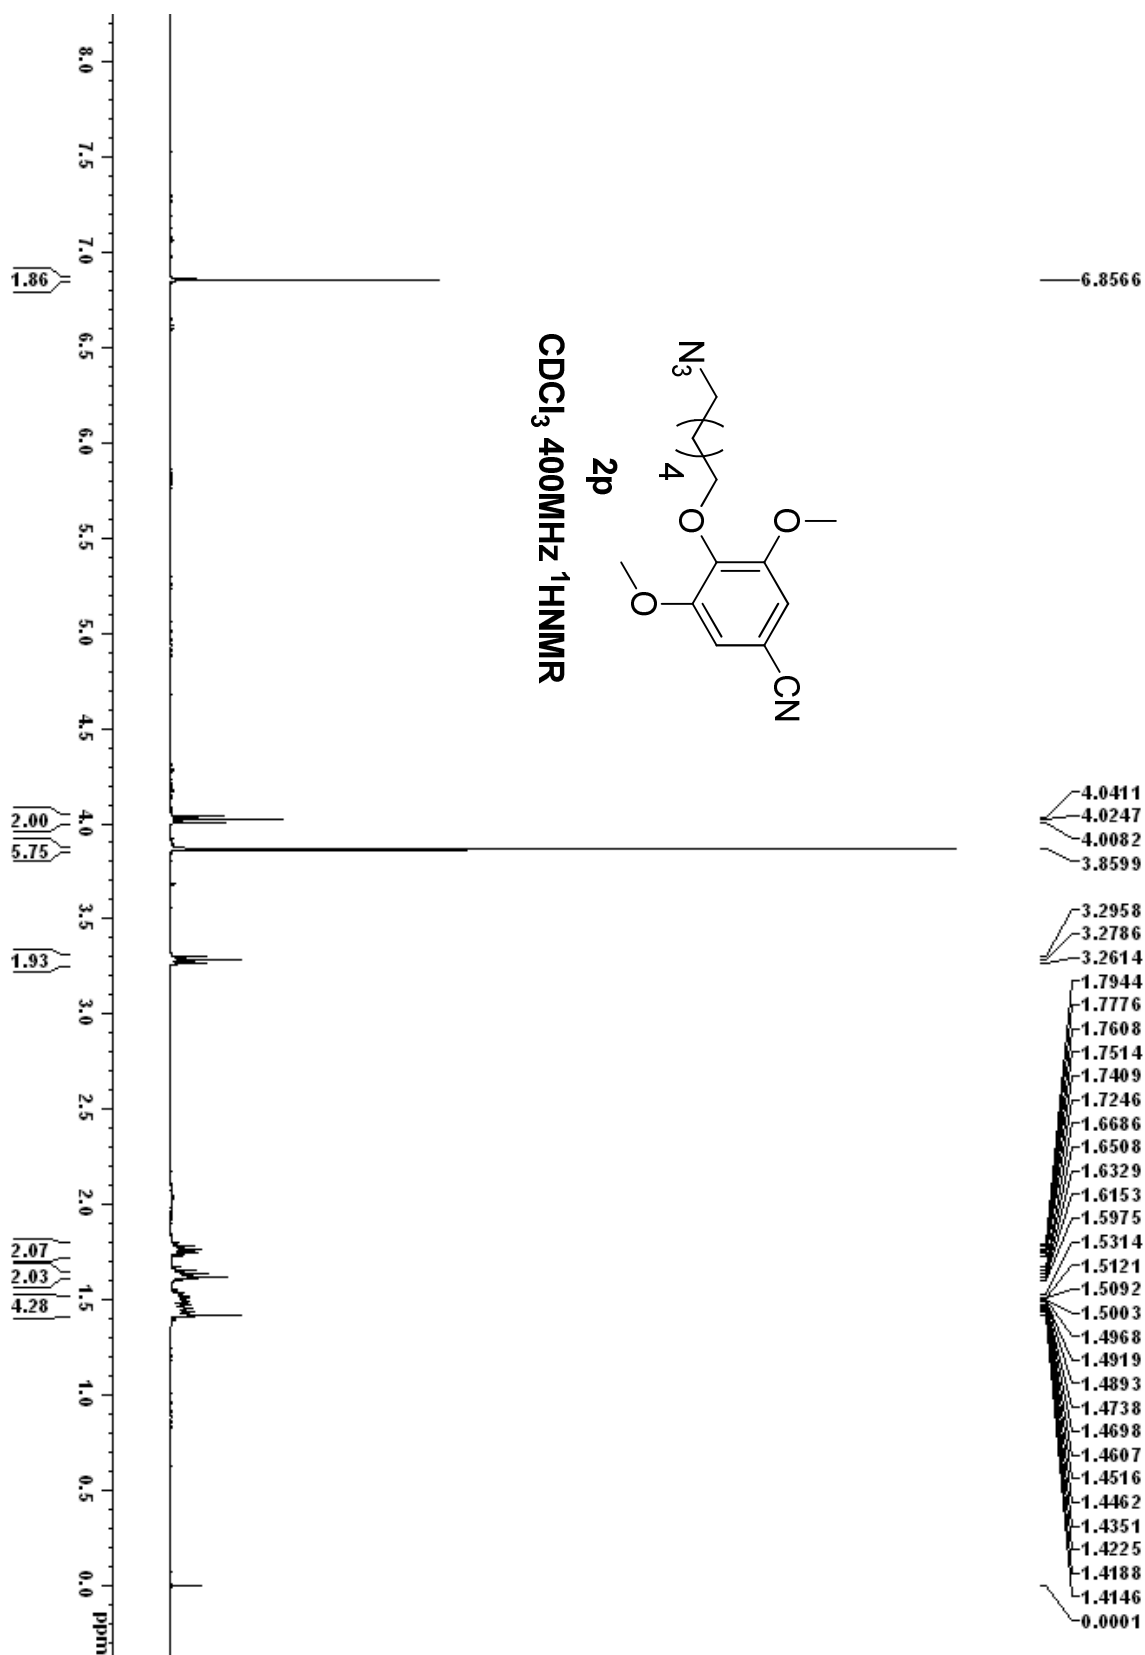

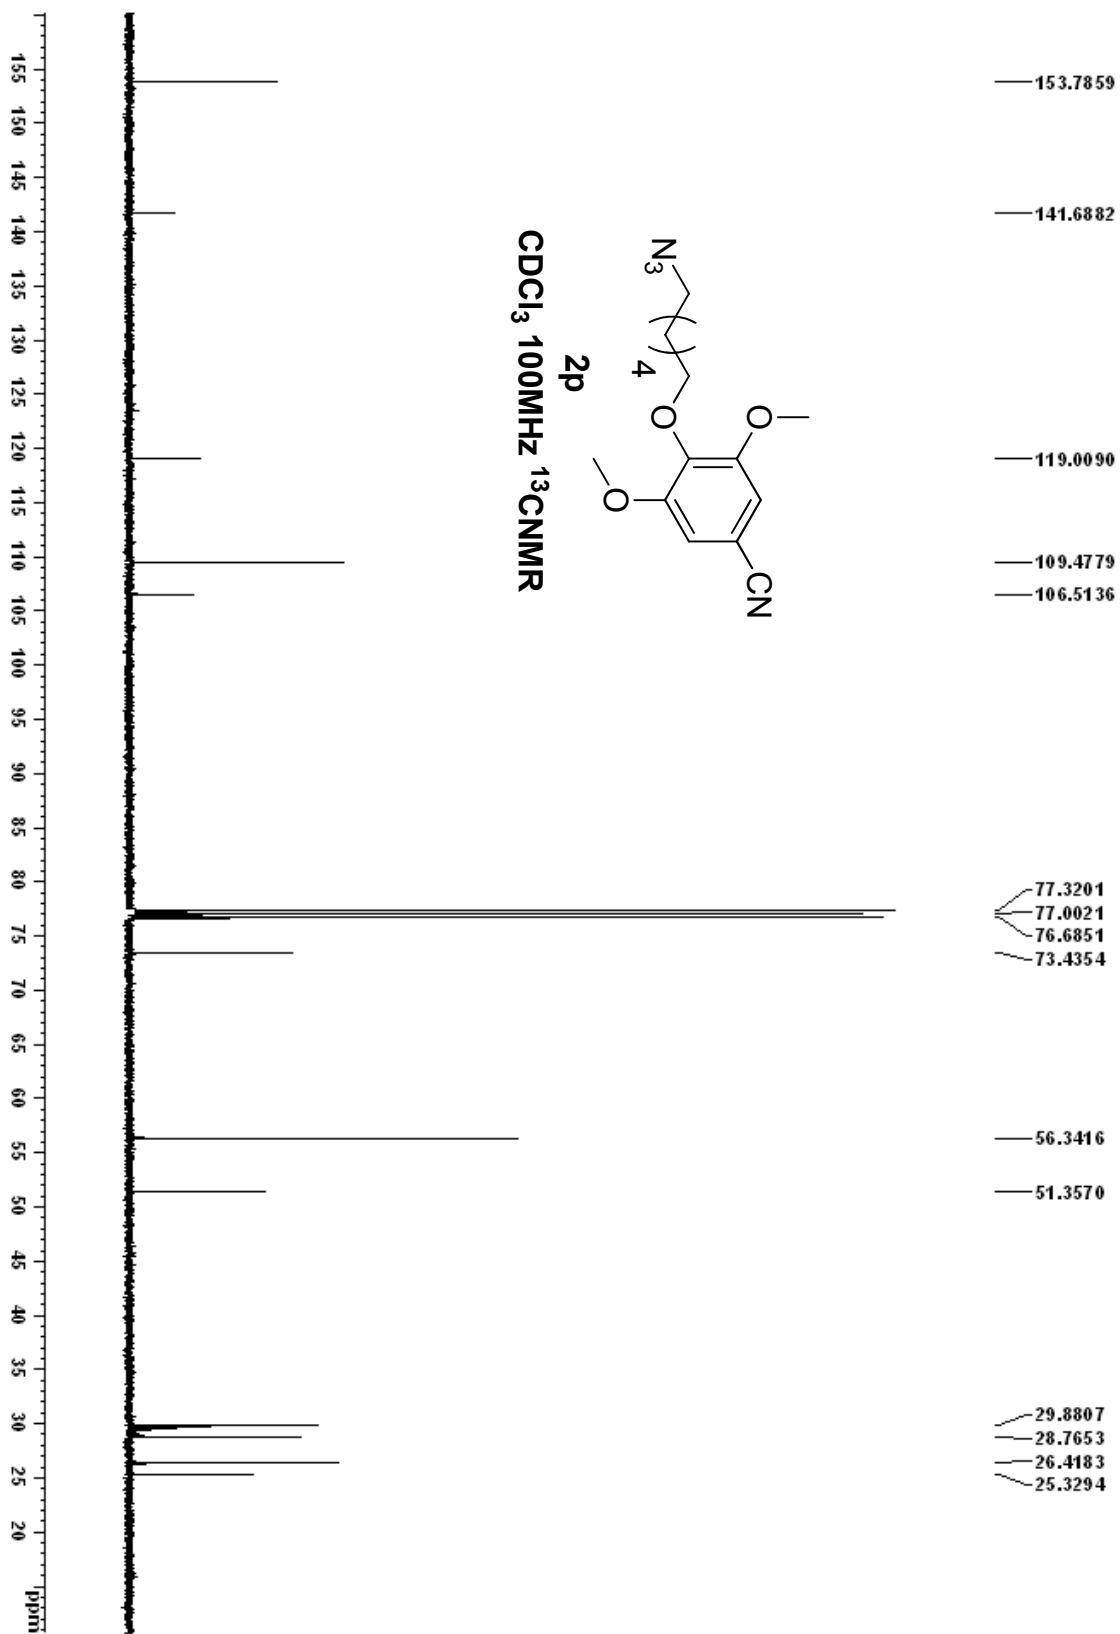

Supplement: c2ob06949k.pdf [file c2ob06949k.pdf]
